# Supplementary material
Source: PubMed Central journal article supplement (PMC7923636)
Supplement: pnas.2018033118.sapp.pdf [file pnas.2018033118.sapp.pdf]

# PNAS

[www.pnas.org](http://www.pnas.org)

Supplementary Information for

**A de novo strategy to develop NIR precipitating fluorochrome for long-term in situ cell membrane bioimaging**

Ke Li<sup>a</sup>, Yifan Lyu<sup>a</sup>, Yan Huang<sup>a</sup>, Shuai Xu<sup>a</sup>, Hong-Wen Liu<sup>a</sup>, Lanlan Chen<sup>b</sup>, Tian-Bing Ren<sup>a</sup>, Mengyi Xiong<sup>a</sup>, Shuangyan Huan<sup>a</sup>, Lin Yuan<sup>a</sup>, Xiao-Bing Zhang<sup>a,\*</sup>, and Weihong Tan<sup>a</sup>

Email: [xbzhang@hnu.edu.cn](mailto:xbzhang@hnu.edu.cn)

**This PDF file includes:**

- Experimental section
- Synthesis section
- Schemes S1 to S4
- Figures S1 to S83
- Tables S1 to S21
- SI References

## Experimental Section

**Materials and instruments.** Solvents and reagents of the best grade available were supplied by Qingdao Ocean Chemicals (Qingdao, China), Beyotime Biotechnology, Sigma-Aldrich, Bide Pharmaceutical Technology, Abcam, and SANTA CRUZ BIOTECHNOLOGY INC, and were used without further purification unless noted otherwise. Column chromatography was employed over silica gel (100-200 mesh), and thin-layer chromatography (TLC) was executed using silica gel 60 F254 plates. Water was purified and doubly distilled by a Milli-Q system (Millipore, USA). Fluorescence measurements were conducted at room temperature on a Hitachi F-4600 spectrofluorometer (Tokyo, Japan) with both excitation and emission slit set at 10.0 nm. NMR spectra were recorded on a Bruker DRX-400 spectrometer at 100 MHz for  $^{13}\text{C}$  NMR and 400 MHz for  $^1\text{H}$  NMR, using TMS as an internal standard. Mass spectra were performed using a Matrix Assisted Laser Desorption Ionization Time of Flight Mass Spectrometry (ultrafleXtreme). DAPI (D4055) was obtained from US. Everbright® Inc. Bcy-GGT was obtained from Jiang's group (1). L-Glutamic acid  $\gamma$ -(7-amido-4-methylcoumarin) (AMCG) was purchased from Sigma-Aldrich (G7261). Folate-PEG5000-CY 5.5 was purchased from Tanshui Biotechnology. Synthesis of all new compounds is described in Scheme S1-S4.

**DFT Calculations.** To describe the excited state of the fluorophores 2-(2-hydroxyphenyl)quinazolin-4(3H)-one (HPQ-H), HPQ1, HPQ-N and HPQ2, TD-DFT (time-dependent density functional theory) calculations were performed. All calculations and DFT-optimized structures were carried out using the Gaussian 09 program package. All geometries of these fluorophores were optimized at B3LYP/6-31+G level using a CPCM solvation model with water as the solvent. Molecular orbital (MO) plots and MO energy levels were computed at the same theoretical level.

**Spectrophotometric Experiments.** Fluorescence measurement experiments were carried out in 10 mM Tris-buffered saline (1% glycerol, TBS; 10 mM Tris-HCl and 0.15 M NaCl, pH 7.4) buffer solution containing 5% DMSO as the co-solvent. UV-Vis absorption experiments were carried out in DMSO or glycerol: PBS = 1:1. Fluorescence emission spectra were recorded at an excitation wavelength of 450 nm with emission wavelength ranging from 550 to 800 nm. Solutions of various species were prepared from L-lysine, L-glutamate, L-valine, L-isoleucine, L-threonine, L-tyrosine, L-tryptophan, phenylalanine, arginine, glucose,  $\text{CaCl}_2$ , BSA, NaClO,  $\text{H}_2\text{O}_2$ ,  $\text{Zn}(\text{NO}_3)_2$ ,  $\text{FeSO}_4$ ,  $\text{FeCl}_3$ ,  $\text{MgCl}_2$ , GSH, cathepsin B, monoamine oxidase, alkaline phosphatase, leucine aminopeptidase, and sulfatase in deionized water. The test solution was composed of HYPQG (5  $\mu\text{M}$ ) in 1 mL of 10 mM TBS buffer. The resulting solutions were cultured at 37  $^\circ\text{C}$  for 40 min, followed by measurement of fluorescence spectra. All the filtration experiments were performed by using 0.22  $\mu\text{m}$  filter.

**Kinetics Assay of Probe HYPQG.** The enzyme reaction for kinetics study of HYPQG was performed at a series of the final concentrations (2-20  $\mu\text{M}$ ) and hydrolyzed by GGT (80 U/L). The reaction was monitored by measuring fluorescence change at 650 nm (excited at 450 nm) at 37  $^\circ\text{C}$  for 40 min. Initial velocity was calculated from the slope of each progress curve. The parameters  $V_{\text{max}}$  and  $K_m$  with GGT for HYPQG was determined by Lineweaver-Burk plot as shown in Fig. S13. The results were fitted to the Michaelis-Menten equation for calculating the apparent kinetics parameters, as

$$V = V_{\text{max}}[\text{S}]/(K_m + [\text{S}]),$$

where  $[\text{S}]$  = substrate concentration and  $V$  = initial velocity.

**Single crystal.** Crystallization of HPQ from DMF. Crystallization of HPQ4 from dichloromethane (DCM) and hexane.

**Determination of the fluorescence quantum yield.** Fluorescence quantum yield for HYPQ was determined by using cresol purple as reference ( $\Phi_r = 0.58$  in ethanol). The quantum yield was calculated using the following equation:

$$\Phi_s = \Phi_r (A_r F_s / A_s F_r) (n_s^2 / n_r^2)$$

Where, *s* and *r* denote sample and reference, respectively. *A* is the absorbance at the excitation wavelength. *F* is the relative integrated fluorescence intensity and *n* is the refractive index of the solvent.  $\Phi$  is the fluorescence quantum yield. The solid-state fluorescence quantum yield of HYPQ was determined in an integrating sphere.

**Molecule docking.** Docking simulation was operated by using SYBYL (X-2.1). Here, the X-ray crystallographic structure of Alkaline Phosphatase (PDB entry 3tg0) (2) and Glutamyl Transpeptidase 1 (PDB entry 4zcg) (3) were selected for docking analysis. The structure of the probe HYPQG, AMCG and HTPQG was assigned with Gasteiger-Huckel charges. Other parameters were set at default values.

**Cytotoxicity Study.** To study cytotoxicity, A2780, OVCAR3, NIH3T3 and HepG2 cells were seeded onto 96-well plates ( $6 \times 10^3$  cells per well per 200  $\mu$ L of medium), respectively, and incubated for 24 h before treatment, followed by exposure to different concentrations (0-30  $\mu$ M, 1% DMSO) of the HYPQG probe for 6 h, followed by washing with Dulbecco's Phosphate Buffered Saline (DPBS) and incubating for an additional 24 h. Finally, cell viability was measured by 3-(4,5-dimethylthiazol-2-yl)-5-(3-carboxymethoxyphenyl)-2-(4-sulfophenyl)-2H-tetrazolium (MTS) assay, and the absorbance value was measured at 490 nm using a microplate reader.

As shown in Fig. S21, the fluorescence signal gradually reached a plateau within 70 s under 365 nm irradiation, which indicated that the probe was highly sensitive in light. In view of the phototoxicity of UV-light in cell experiments, we also measured the response time of the probe in living cells under blue light (450 nm ~ 470 nm, 18 W) irradiation. The fluorescence signal in cells gradually increased and reached a plateau under blue light irradiation for 2 min, which suggested that we could test the HYPQ toxicity by using this HYPQ-photoactivatable probe.

To study cytotoxicity, A2780, OVCAR3, NIH3T3 and HepG2 cells were seeded in 96-well plates ( $6 \times 10^3$  cells per well per 200  $\mu$ L of medium), respectively, and incubated the HYPQ-photoactivatable probe (0-30  $\mu$ M, 1% DMSO) for 1 h and then washed with Dulbecco's Phosphate Buffered Saline (DPBS), followed by irradiating under blue light for 2 min and incubating for additional 24 h. Finally, cell viability was measured by 3-(4,5-dimethylthiazol-2-yl)-5-(3-carboxymethoxyphenyl)-2-(4-sulfophenyl)-2H-tetrazolium (MTS) assay, and the absorbance value was measured at 490 nm using a microplate reader.

**Flow Cytometry Analysis.** Flow cytometry (BD FACS Calibur) was employed to determine endogenous GGT with the HYPQG probe. A2780, OVCAR3 and NIH3T3 cells in a 6-well plate were precultured for 24 h, respectively, and then treated with HYPQG (5  $\mu$ M) for 40 min. A2780 cells in a 6-well plate were precultured for 24 h and treated with 1 mM of 6-Diazo-5-oxo-L-norleucine (DON) for 1 h, followed by incubation with the HYPQG probe for 40 min. After incubation, the cells were treated with trypsin, washed with DPBS and subjected to flow cytometry analysis. The fluorescence signal was determined by counting 10,000 events in an FL-7 detector by flow cytometry.

**Immunofluorescence Assays.** A2780 and OVCAR3 cells were incubated on a 25 mm Petri dish for 24 h, respectively. The medium was removed, and the cells were washed twice with DPBS (1 mL each). Then, the cells were fixed with 4% paraformaldehyde (500  $\mu$ L per well) for 15 min at room temperature. The 4% paraformaldehyde was removed, and the cells were washed three times with DPBS. Proteins were blocked with 5% BSA in DPBS for 4 h at room temperature. GGT was detected by a 1 mL of GGT antibody (Anti-GGT/GGT antibody, ab55138, obtained from Abcam; dilution 1:500) in 1% BSA in DPBS for 1 h at room temperature. The cells were washed three times with DPBS and labeled with 0.5 mL of secondary antibody (m-IgGk BP-CFL 488, sc-516176, obtained from SANTA CRUZ BIOTECHNOLOGY, INC; dilution 1:100) in DPBS for 2 h at room temperature. Cells were then treated with DAPI (D4055, obtained from U.S. Everbright® Inc.) in DPBS for 0.5 h at room temperature. Finally, the cells were washed three times with DPBS, and the immunofluorescence imaging was performed on a laser confocal microscope (Nikon, Japan). All images and channels were placed at the same settings.

**Western Blotting Analysis.** A2780, OVCAR3 and HepG2 cells were placed in a 25 cm<sup>2</sup> flask and cultured for 24 h, respectively. The medium was removed, and the cells were washed twice with DPBS (1mL each). After that, the cells were treated with M-PER buffer (no.78501, Thermo Fisher Scientific) containing protease inhibitors (no. B14001, Biotool) and lysed for 30 min at 0 °C. The lysates were gathered and centrifuged for 15 min to collect the supernatant (500 × g). The protein concentration of supernatant was measured by a NanoDrop 2000/2000c (Thermo). All proteins were separated by SDS-PAGE and then transferred to a nitrocellulose membrane. The membrane was divided into two parts and then treated with GGT antibodies and GAPDH antibodies (sc-47724, obtained from SANTA CRUZ BIOTECHNOLOGY, INC.; dilution 1:10000) for 12 hours at 4 °C, respectively, followed by incubating with a secondary antibody for 2 hours at room temperature. Finally, the GGT was visualized on ChemiDoc XRS+ with Image Lab software (Bio-RAD).

**Fluorescence microscopy imaging in live cells.** To investigate the capability of HYPQG probe for detection of GGT activity in living cells, cells were first cultured in 1640 medium supplemented with 100 U/mL penicillin, 100 U/mL streptomycin and 10% fetal bovine serum at 37 °C with 5 wt %/vol CO<sub>2</sub> for 24 h before the experiment. Then the media were removed from each well, and cells were washed with DPBS. After that, the cells were cultured with 5 μM of HYPQG in DPBS buffer for 40 min (1% DMSO) at 37 °C, washed with DPBS, and imaged. To confirm that fluorescence enhancement was triggered by the catalysis of GGT, cells were cultured in DPBS buffer containing 1 mM of DON for 1 hour and then treated with HYPQG (5 μM) for another 40 min. Confocal fluorescence imaging of cells was obtained on a confocal laser scanning microscope (Nikon, Japan). Image analysis was performed by using ImageJ.

**Long-term imaging experiments.** A2780 cells were plated in 24 Petri dishes (25 mm) and cultured for 24 h, respectively. The medium was removed, and the cells were washed with DPBS (1mL each). After that, the cells were treated with 5 μM of HYPQG in DPBS buffer for 40 min, 70 min, 100 min, 160 min, 220 min, 280 min, 340 min and 400 min (1% DMSO) at 37 °C, respectively, and then washed with DPBS and imaged. Cells were treated with 5 μM of Memb-Tracker Green or Memb-Tracker Red for 10 min, 40 min, 70 min, 130 min, 190 min, 250 min, 310 min and 370 min (1% DMSO) at 37 °C and then washed with DPBS and imaged. HepG2 cells were plated in 8 Petri dishes (25 mm) and cultured for 24 h, respectively. The medium was removed, and the cells were washed with TBS (1mL each). After that, the cells were treated with 5 μM of HTPQA in TBS buffer for 40 min, 70 min, 100 min, 160 min, 220 min, 280 min, 340 min and 400 min (1% DMSO) at 37 °C, respectively, and then washed with TBS and imaged. All “0 h” fluorescence images were obtained when the fluorescence signal had reached a plateau for each probe, thus ensuring that the long-term imaging experiments were performed under the same conditions.

**Animal model.** Animal procedures were performed in accordance with protocol No. SYXK (Xiang) 2008-0001 approved by the Laboratory Animal Center of Hunan. Male BALB/c homozygous athymic mice (~3 weeks old, 16~18 g) were obtained from Hunan SJA Laboratory Animal Co., Ltd. and used under protocols approved by Hunan University Laboratory Animal Center. Nude mice were kept in a pathogen-free environment and housed in sterile cages with airflow hoods.

To generate the A2780 murine tumor model, 5×10<sup>7</sup> A2780 cells in 100 μL DPBS were subcutaneously injected in the right flanks of each mouse. Diameter of tumors is ca. 5 mm.

**In vivo imaging.** Before *in vivo* imaging, mice were anesthetized by inhalation of 5% isoflurane in 100% oxygen. Nude mice were imaged using a Caliper VIS Lumina XR small animal optical *in vivo* imaging system. The concentration of the injected solution was 20 μM (25 μL, PBS/DMSO = 8:2, pH = 7.4). For *in vivo* imaging: HYPQ and DCMG: λ<sub>ex</sub> = 535 nm, Bcy-GGT and Folate-PEG5000-CY 5.5: λ<sub>ex</sub> = 640 nm, and Cy5.5 filter was chosen as the all emission channel.

## Synthesis Section

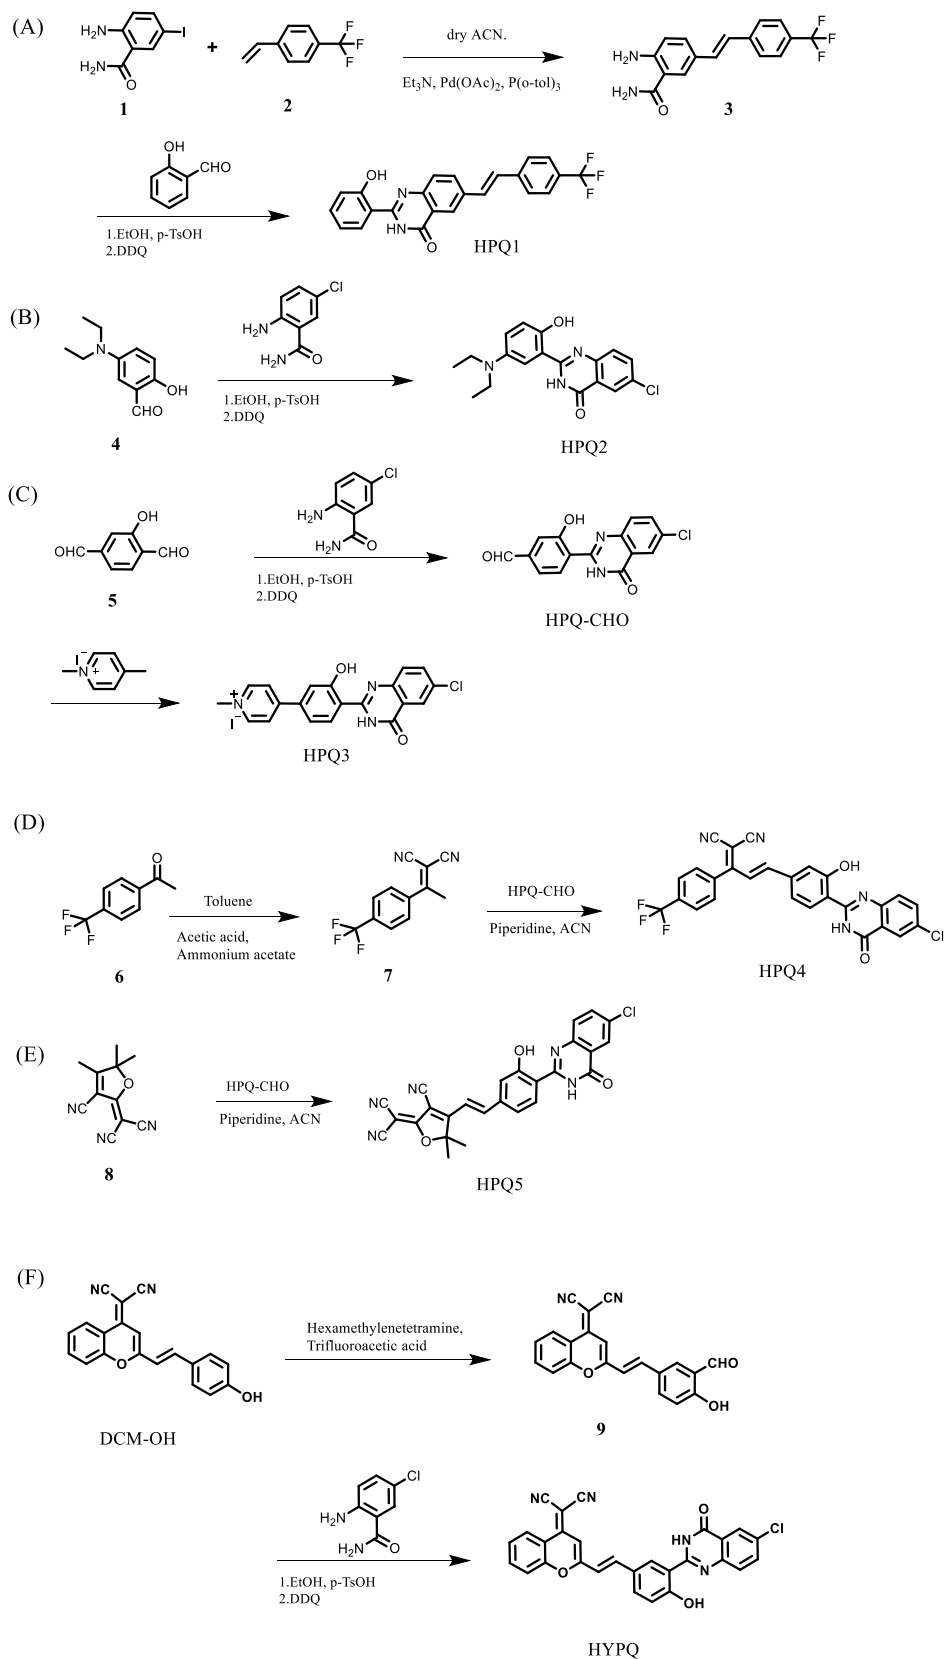

**Scheme S1.** Synthetic routes of HPQ1, HPQ2, HPQ3, HPQ4, HPQ5 and HYPQ.

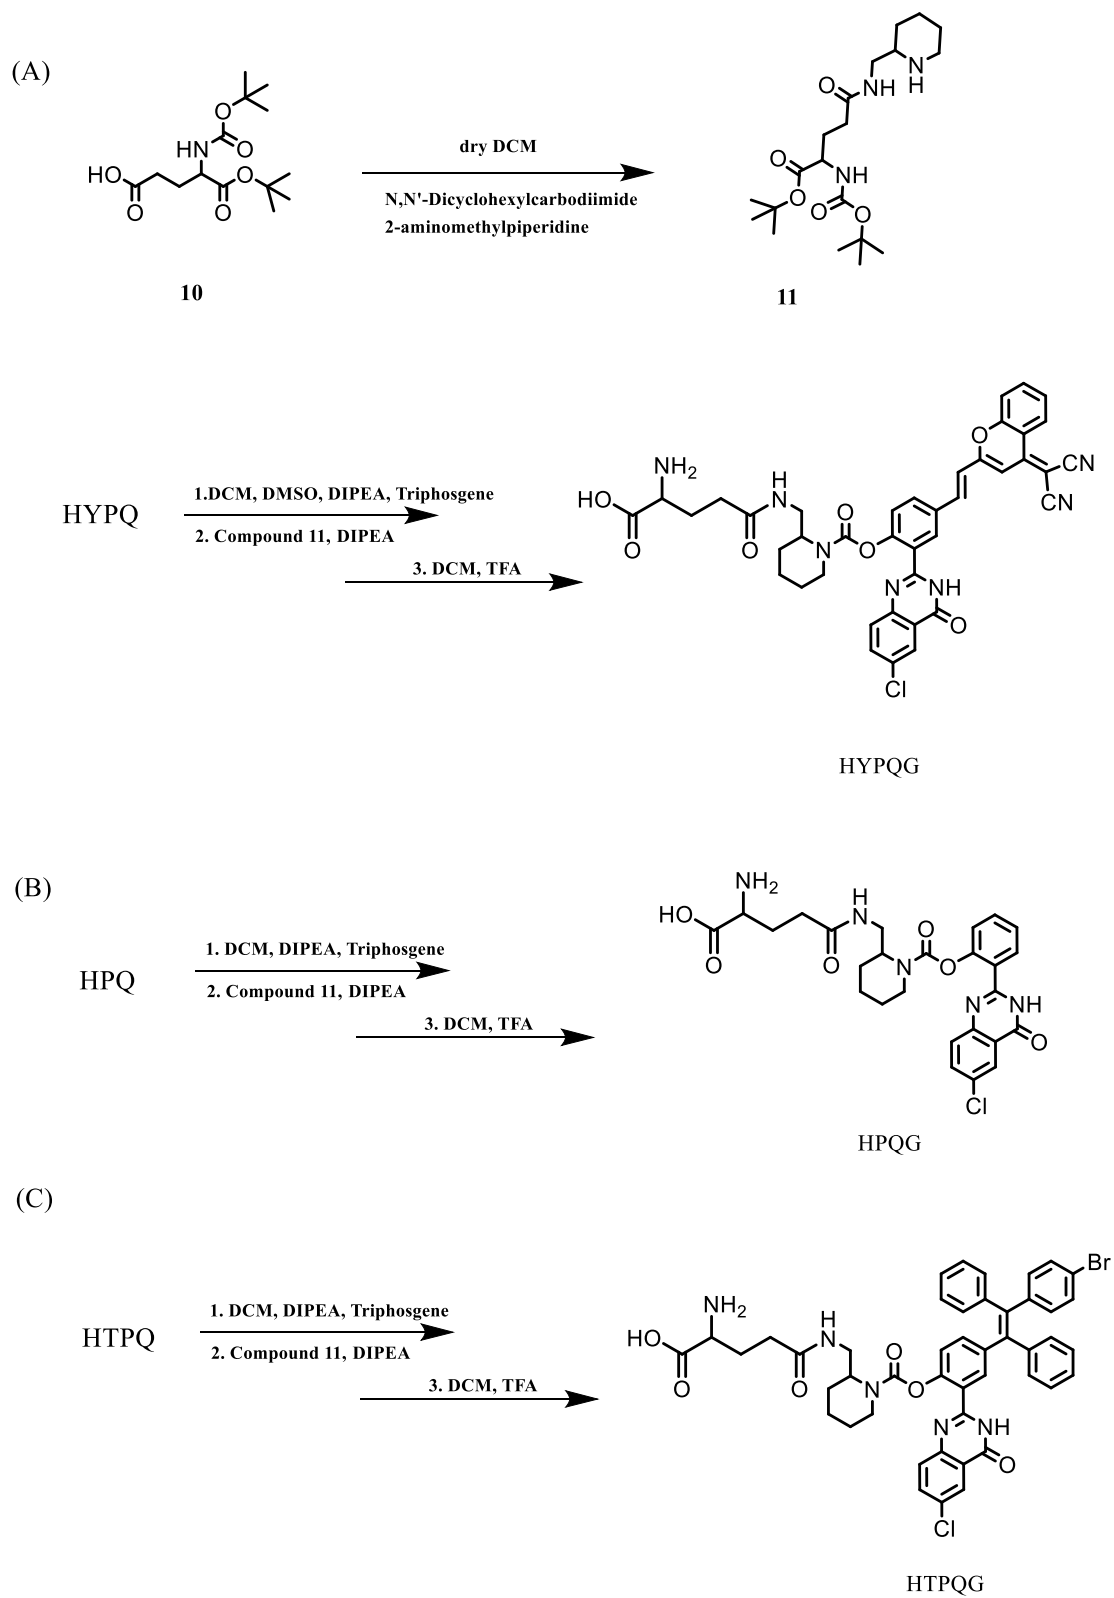

**Scheme S2.** Preparation of probe HYPQG, HPQG and HTPQG.

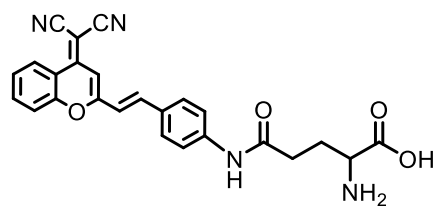

DCMG

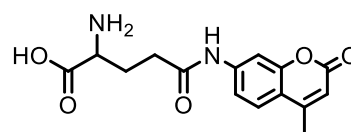

AMCG

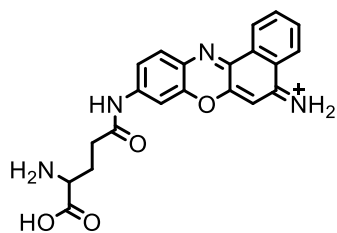

Cv-Glu

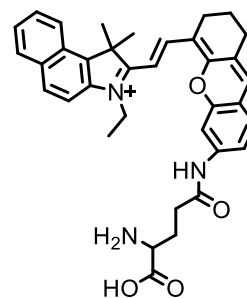

Bey-GGT

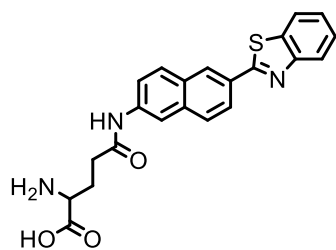

Np-Glu

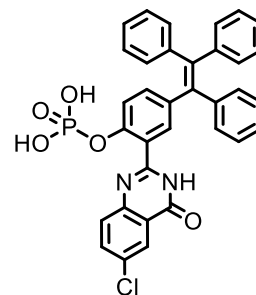

HTPQA

**Scheme S3.** Preparation of the control probes.

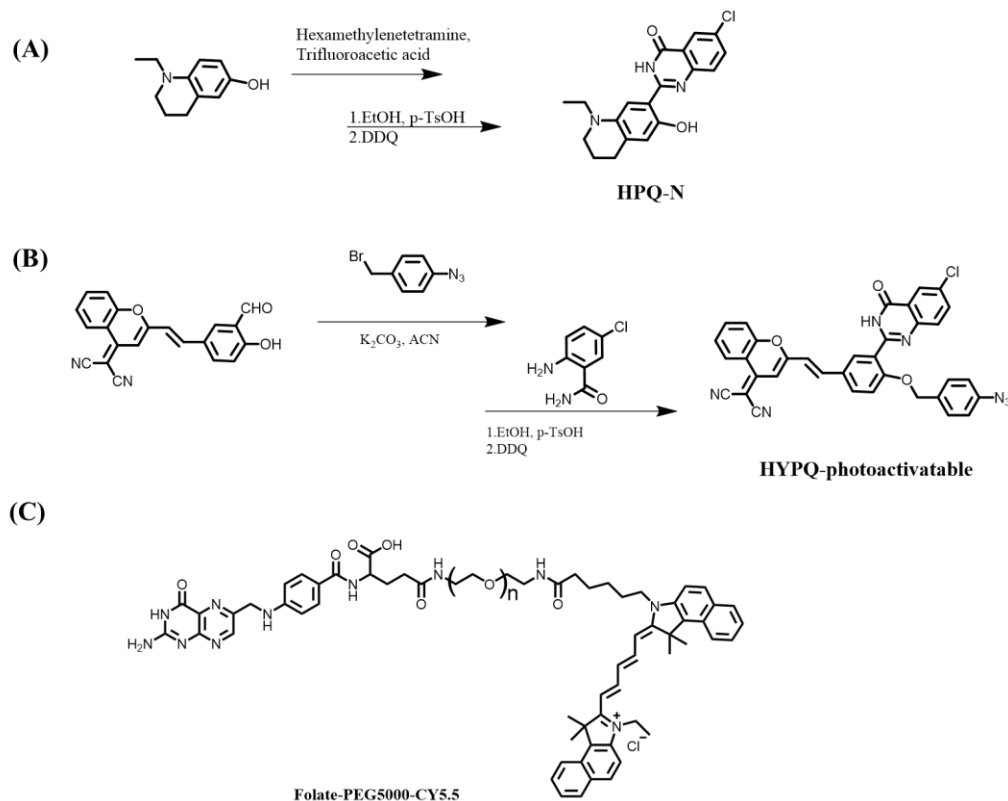

**Scheme S4.** Preparation of the control fluorophore (A) or probes (B) and (C).

**(E)-2-amino-5-(4-(trifluoromethyl) styryl) benzamide (3).**

2-amino-5-iodobenzamide (131.0 mg, 0.5 mmol), 1-(trifluoromethyl)-4-vinylbenzene (258.0 mg, 1.5 mmol) and Et<sub>3</sub>N (255.0 mg, 2.5 mmol) were dissolved in 10 mL of anhydrous ACN. Then Pd(OAc)<sub>2</sub> (12.6 mg, 0.05 mmol) and P(o-tol)<sub>3</sub> (46.0 mg, 0.1 mmol) were added. The flask was sealed, and the solution was stirred at 120 °C for 5 hours. Reaction was monitored by TLC (DCM: EtOH 40:1). Upon completion, the reaction mixture was diluted with DCM and washed with saturated NH<sub>4</sub>Cl. The organic phase was dried over Na<sub>2</sub>SO<sub>4</sub> and concentrated under reduced pressure. The residue was purified by column chromatography on silica gel (DCM: EtOH 50:1). The product was obtained as a white solid (78.0 mg, 51% yield). <sup>1</sup>H NMR (400 MHz, Methanol-*d*<sub>4</sub>) δ 7.8 (s, 1H), 7.7 (d, *J* = 8.2 Hz, 2H), 7.6 (d, *J* = 8.3 Hz, 2H), 7.5 (d, *J* = 7.5 Hz, 1H), 7.2 (d, *J* = 6.4 Hz, 1H), 7.1 (d, *J* = 6.4 Hz, 1H), 6.8 (d, *J* = 8.6 Hz, 1H). <sup>13</sup>C NMR (101 MHz, Chloroform-*d*) δ 171.3, 141.2, 136.3, 130.9, 130.3, 128.5, 127.2, 126.1, 125.6, 125.2, 123.9, 119.4, 117.8. MALDI-TOF/MS, *m/z*: calcd for [C<sub>16</sub>H<sub>13</sub>F<sub>3</sub>N<sub>2</sub>O+H<sup>+</sup>] 307.1, found 307.8.

**(E)-2-(2-hydroxyphenyl)-6-(4-(trifluoromethyl) styryl) quinazolin-4(3H)-one (HPQ1).**

Compound 3 (52.0 mg, 0.17 mmol) was dissolved in absolute EtOH to give a red solution to which salicylaldehyde (18 μL, 0.17 mmol) was added at room temperature. This reaction mixture was heated to reflux for 30 min, and then *p*-TsOH monohydrate (0.02 equiv.) was added, and reflux was continued for 2 h. The yellow suspension was cooled to room temperature, and then 2,3-dichloro-5,6-dicyano-1,4-benzoquinone (DDQ, 1.01 equiv.) was added in several portions, and the reaction mixture was further stirred overnight at room temperature. The precipitate was filtered, washed three times with absolute EtOH, and then twice with diethyl ether. It was finally air dried to yield a beige powder showing strong green fluorescence under a UV lamp (56.9 mg, 82% yield). <sup>1</sup>H NMR (400 MHz, DMSO-*d*<sub>6</sub>) δ 13.7 (s, 1H), 12.5 (s, 1H), 8.3 (s, 1H), 8.2 (s, 1H), 8.2 (d, *J* = 8.3 Hz, 1H), 7.9 (d, *J* = 7.7 Hz, 2H), 7.8 – 7.7 (m, 3H), 7.6 (q, *J* = 6.5 Hz, 2H), 7.5 (d, *J* = 7.6 Hz, 1H), 7.0 (d, *J* = 8.2 Hz, 1H), 6.9 (d, *J* = 7.5 Hz, 1H). <sup>13</sup>C NMR (101 MHz, DMSO-*d*<sub>6</sub>) δ 161.7, 160.4, 153.7, 148.1, 146.4, 141.4, 135.7, 134.2, 133.2, 130.4, 128.7, 128.1, 128.0, 127.6, 127.1, 126.0, 124.8, 121.5,



119.3, 118.4, 114.3, 113.8, 83.1. MALDI-TOF/MS, *m/z*: calcd for [C<sub>23</sub>H<sub>15</sub>F<sub>3</sub>N<sub>2</sub>O<sub>2</sub>+H<sup>+</sup>] 409.1, found 409.3.

**6-chloro-2-(5-(diethylamino)-2-hydroxyphenyl) quinazolin-4(3H)-one (HPQ2).**

Compound HPQ2 was synthesized following a procedure similar to that of HPQ1. The crude product was recrystallized in EtOH to yield compound HPQ2 as a yellow solid (230.0 mg, 0.67 mmol) in 92% yield. <sup>1</sup>H NMR (400 MHz, DMSO-*d*<sub>6</sub>) δ 10.2 (s, 1H), 8.1 – 8.0 (m, 1H), 7.8 (dd, *J* = 8.8, 2.5 Hz, 1H), 7.6 (d, *J* = 8.7 Hz, 1H), 7.2 (s, 1H), 6.6 (s, 1H), 6.5 – 6.3 (m, 1H), 6.1 (d, *J* = 2.5 Hz, 1H), 3.5 (s, 4H), 1.1 (d, *J* = 6.5 Hz, 6H). <sup>13</sup>C NMR (101 MHz, DMSO-*d*<sub>6</sub>) δ 163.0, 154.9, 143.6, 135.3, 131.8, 130.6, 129.9, 129.2, 125.5, 121.3, 114.8, 112.8, 104.3, 100.8, 98.2, 44.3, 13.0, 11.2. MALDI-TOF/MS, *m/z*: calcd for [C<sub>18</sub>H<sub>18</sub>ClN<sub>3</sub>O<sub>2</sub>+H<sup>+</sup>] 344.1, found 344.1.

**4-(4-(6-chloro-4-oxo-3,4-dihydroquinazolin-2-yl)-3-hydroxyphenyl)-1-methylpyridin-1-ium iodide (HPQ3).**

HPQ-CHO (150.0 mg, 0.50 mmol), 1,4-dimethylpyridin-1-ium iodide (235.0 mg, 1.0 mmol) and piperidine (0.8 mL) were dissolved in ACN (20 mL) under nitrogen protection. The resultant mixture was refluxed for 6 h, followed by extraction with DCM. The organic layers were dried over Na<sub>2</sub>SO<sub>4</sub> and concentrated under reduced pressure. The crude product was recrystallized in EtOH and then purified by column chromatography on silica gel (DCM: EtOH 20:1) to yield compound HPQ3 as a yellow solid (88.4 mg, 36% yield). <sup>1</sup>H NMR (400 MHz, DMSO-*d*<sub>6</sub>) δ 9.9 (s, 1H), 8.9 (d, *J* = 6.2 Hz, 2H), 8.8 (s, 1H), 8.2 (d, *J* = 6.1 Hz, 2H), 8.1 (d, *J* = 5.6 Hz, 2H), 8.0 (d, *J* = 6.3 Hz, 1H), 7.8 (dd, *J* = 8.2, 14.2 Hz, 5H), 7.2 (d, *J* = 8.5 Hz, 1H), 4.3 (s, 3H). <sup>13</sup>C NMR (101 MHz, DMSO-*d*<sub>6</sub>) δ 190.6, 179.1, 153.3, 145.2, 140.4, 135.3, 134.2, 132.6, 128.5, 128.1, 125.3, 123.4, 122.4, 121.5, 120.0, 118.9, 98.5, 89.1, 68.2, 27.0. MALDI-TOF/MS, *m/z*: calcd for C<sub>20</sub>H<sub>15</sub>ClN<sub>3</sub>O<sub>2</sub> 390.8, found 390.4.

**2-(1-(4-(trifluoromethyl) phenyl) ethylidene) malononitrile (7).**

1-(4-(trifluoromethyl) phenyl) ethan-1-one (90.0 mg, 0.50 mmol) and dicyanopropane (132.0 mg, 2.0 mmol) were dissolved in toluene (20 mL) with acetic acid (0.20 mL) and ammonium acetate (154.0 mg, 2.0 mmol) under nitrogen protection. The resultant mixture was refluxed for 5 h, followed by extraction with DCM. The organic layers were dried over Na<sub>2</sub>SO<sub>4</sub> and concentrated under reduced pressure. The crude product was purified by column chromatography on silica gel (PE: DCM 5:1) to yield compound **7** as a white solid (43.7 mg, 37% yield). <sup>1</sup>H NMR (400 MHz, Chloroform-*d*) δ 7.8 (d, *J* = 8.1 Hz, 2H), 7.7 (d, *J* = 8.0 Hz, 2H), 2.7 (s, 3H). <sup>13</sup>C NMR (101 MHz, CDCl<sub>3</sub>) δ 173.8, 139.2, 133.8, 133.5, 127.7, 126.2, 124.6, 121.9, 112.0, 86.7, 68.2, 31.9, 30.3, 29.7, 24.4, 22.7, 14.1. ESI/MS, *m/z*: calcd for [C<sub>12</sub>H<sub>7</sub>F<sub>3</sub>N<sub>2</sub>-H] 235.1, found 235.1.

**(E)-2-(3-(4-(6-chloro-4-oxo-3,4-dihydroquinazolin-2-yl)-3-hydroxyphenyl)-1-(4-(trifluoromethyl) phenyl) allylidene) malononitrile (HPQ4).**

HPQ-CHO (150.0 mg, 0.50 mmol) and 2-(1-(4-(trifluoromethyl) phenyl) ethylidene) malononitrile (236.0 mg, 1.0 mmol) were dissolved in ACN (20 mL) with piperidine (0.8 mL) under nitrogen protection. The resultant mixture was refluxed for 8 h, followed by extraction with DCM. The organic layers were dried over Na<sub>2</sub>SO<sub>4</sub> and concentrated under reduced pressure. The crude product was purified by column chromatography on silica gel (DCM: EtOH 80:1) to yield compound HPQ4 as a yellow solid (101 mg, 39% yield). <sup>1</sup>H NMR (400 MHz, DMSO-*d*<sub>6</sub>) δ 8.51 (s, 1H), 8.0 (d, *J* = 8.6 Hz, 2H), 7.8 (d, *J* = 8.0 Hz, 3H), 7.8 (d, *J* = 8.5 Hz, 3H), 7.5 (d, *J* = 9.2 Hz, 1H), 7.2 (s, 1H), 7.0 (s, 1H), 6.8 (d, *J* = 5.8 Hz, 1H), 6.7 (s, 1H). <sup>13</sup>C NMR (101 MHz, DMSO-*d*<sub>6</sub>) δ 170.1, 160.9, 153.9, 149.2, 135.5, 134.5, 131.8, 130.5, 130.1, 128.7, 126.4, 125.5, 122.9, 122.5, 119.9, 114.7, 114.4, 113.5, 35.6, 31.7, 29.5, 29.5, 29.1, 29.0, 27.0, 25.6, 22.5, 14.4. MALDI-TOF/MS, *m/z*: calcd for C<sub>27</sub>H<sub>14</sub>ClF<sub>3</sub>N<sub>4</sub>O<sub>2</sub> 518.1, found 518.1.

**(E)-2-(4-(4-(6-chloro-4-oxo-3,4-dihydroquinazolin-2-yl)-3-hydroxystyryl)-3-cyano-5,5-dimethylfuran-2(5H)-ylidene) malononitrile (HPQ5).**

2-(3-cyano-4,5,5-trimethylfuran-2(5H)-ylidene) malononitrile was synthesized following the procedure previously described (5). HPQ5 was synthesized following the same procedure as that for HPQ4. The crude product was recrystallized in EtOH to yield compound HPQ5 as a yellow solid

(46.5 mg, 26% yield). <sup>1</sup>H NMR (400 MHz, DMSO-*d*<sub>6</sub>) δ 8.1 (dd, *J* = 4.1, 2.2 Hz, 1H), 7.9 – 7.9 (m, 1H), 7.7 (d, *J* = 8.8 Hz, 2H), 7.5 (d, *J* = 8.0 Hz, 3H), 7.1 (d, *J* = 7.7 Hz, 3H), 2.3 (s, 6H). <sup>13</sup>C NMR (101 MHz, DMSO-*d*<sub>6</sub>) δ 159.7, 159.3, 141.2, 138.3, 136.1, 132.3, 128.5 (m), 125.9, 124.6, 121.5, 99.9, 21.2, 20.1. MALDI-TOF/MS, *m/z*: calcd for C<sub>26</sub>H<sub>16</sub>ClN<sub>5</sub>O<sub>3</sub> 481.1, found 481.0.

**(E)-2-(2-(3-formyl-4-hydroxystyryl)-4H-chromen-4-ylidene) malononitrile (9).**

DCM-OH was synthesized following the previously described procedure (6). DCM-OH (156.0 mg, 0.50 mmol) and hexamethylenetetramine (84.0 mg, 0.60 mmol) were dissolved in trifluoroacetic acid (5.0 mL) under nitrogen protection. The resultant mixture was refluxed for 5 h, followed by hydrolysis with 4 mol HCl for 2 h at 100 °C. The precipitate was filtered, washed three times with diethyl ether and finally air dried to yield a black powder. The black solid was purified by column chromatography on silica gel (DCM: EA 100:1) to yield compound **9** as a yellow solid (34 mg, 20% yield). <sup>1</sup>H NMR (400 MHz, Chloroform-*d*) δ 11.3 (s, 1H), 10.2 (s, 1H), 9.0 – 8.9 (m, 1H), 7.8 (s, 2H), 7.7 (d, *J* = 7.2 Hz, 1H), 7.6 – 7.5 (m, 2H), 7.5 (t, *J* = 7.3 Hz, 1H), 7.1 (d, *J* = 9.3 Hz, 1H), 6.9 (s, 1H), 6.8 (d, *J* = 5.9 Hz, 1H). <sup>13</sup>C NMR (101 MHz, DMSO-*d*<sub>6</sub>) δ 190.4, 168.6, 163.3, 158.9, 155.0, 153.4, 152.5, 138.5, 135.8, 129.1, 126.8, 125.0, 123.3, 119.5, 118.8, 118.1, 117.7, 117.5, 116.3, 106.7, 60.2. MALDI-TOF/MS, *m/z*: calcd for [C<sub>21</sub>H<sub>12</sub>N<sub>2</sub>O<sub>3</sub>+H<sup>+</sup>] 341.1, found 341.9.

**(E)-2-(2-(3-(6-chloro-4-oxo-3,4-dihydroquinazolin-2-yl)-4-hydroxystyryl)-4H-chromen-4-ylidene) malononitrile (HYPQ).**

Compound **9** (34.0 mg, 0.1 mmol) was dissolved in EtOH (15 mL) and DCM (5 mL) to give a yellow solution to which 2-amino-5-chlorobenzamide (25.0 mg, 0.15 mmol) was added at room temperature. This reaction mixture was heated to reflux for 30 min, then *p*-TsOH monohydrate (0.02 equiv.) was added, and reflux was continued for 2 h. The red suspension was cooled to room temperature, and then DDQ (1.01 equiv.) was added in several portions. The reaction mixture was further stirred overnight at room temperature. The precipitate was filtered, washed three times with absolute EtOH, then twice with DCM, and finally air dried to yield a dark red powder showing strong red fluorescence under a UV lamp. (14.2 mg, 29% yield). <sup>1</sup>H NMR (400 MHz, DMSO-*d*<sub>6</sub>) δ 8.9 – 8.7 (m, 1H), 8.6 (s, 1H), 8.1 (s, 1H), 7.9 (s, 2H), 7.9 – 7.8 (m, 4H), 7.8 – 7.7 (m, 2H), 7.6 (d, *J* = 7.9 Hz, 1H), 7.4 (s, 1H), 7.1 (d, *J* = 8.8 Hz, 1H), 6.9 (s, 1H). <sup>13</sup>C NMR (101 MHz, DMSO-*d*<sub>6</sub> and pyridine-*d*<sub>5</sub>) δ 189.9, 182.4, 172.8, 161.2, 155.6, 147.6, 136.5, 135.4, 134.6, 134.2, 132.8, 130.0, 128.9, 125.4, 124.7, 124.2, 123.2, 122.7, 121.8, 115.4, 44.2. ESI/MS, *m/z*: calcd for [C<sub>28</sub>H<sub>15</sub>ClN<sub>4</sub>O<sub>3</sub>-H] 489.1, found 489.3.

**Tert-butyl N2-(tert-butoxycarbonyl)-N5-(piperidin-2-ylmethyl) glutamate (11).**

To an ice-cold suspension of Boc-Glu-OtBu (303.0 mg, 1 mmol) and hydroxybenzotriazole (150.0 mg, 1.1 mmol) in dry DCM (20 mL) was added dropwise a solution of N,N'-dicyclohexylcarbodiimide (227.0 mg, 1.1 mmol), and the mixture was stirred for 15 min. Then 2-aminomethylpiperidine (114.0 mg, 1mmol) was added dropwise to the reaction mixture. After 24 h stirring at room temperature, the colorless solid material 1,3-dicyclohexylurea was filtered off. The filtrate was washed with sat. NaHCO<sub>3</sub> and then extracted several times with a solution of HCl at pH = 3. DCM (100 mL) was added to the combined acidic aqueous layers which were then treated with an aqueous solution of 2 M NaOH to reach a pH of 12. This basic aqueous layer was washed twice with DCM, and organic layers were dried with anhydrous Na<sub>2</sub>SO<sub>4</sub> and evaporated under reduced pressure to a yield crude oil. The oil was left at 4 °C overnight, and the remaining crystallized 1,3-dicyclohexylurea was filtered off, as previously described. Column chromatography (DCM : MeOH = 40 : 1) gave compound **11** (164 mg, 41%) <sup>1</sup>H NMR (400 MHz, Chloroform-*d*) δ 6.7 (d, *J* = 7.3 Hz, 1H), 5.4 (d, *J* = 7.6 Hz, 1H), 4.1 (s, 1H), 3.3 (d, *J* = 8.5 Hz, 1H), 3.2 – 2.9 (m, 2H), 2.8 (s, 1H), 2.7 – 2.5 (m, 2H), 2.2 (t, *J* = 7.2 Hz, 3H), 1.8 (s, 2H), 1.6 (d, *J* = 7.9 Hz, 2H), 1.6 (s, 1H), 1.5 – 1.3 (m, 18H), 1.2 – 1.0 (m, 1H). <sup>13</sup>C NMR (101 MHz, CDCl<sub>3</sub>) δ 172.3, 171.5, 155.9, 123.9, 123.7, 118.6, 111.2, 82.2, 79.8, 55.9, 53.5, 46.5, 45.0, 32.5, 30.2, 29.9, 29.3, 28.3, 27.9, 26.2, 25.9, 24.0. MALDI-TOF/MS, *m/z*: calcd for [C<sub>20</sub>H<sub>37</sub>N<sub>3</sub>O<sub>5</sub>+H<sup>+</sup>] 400.3, found 400.3.

**(E)-N5-((1-((2-(6-chloro-4-oxo-3,4-dihydroquinazolin-2-yl)-4-(2-(4-(dicyanomethylene)-4H-chromen-2-yl) vinyl) phenoxy) carbonyl) piperidin-2-yl) methyl) glutamine (HYPQG).**

HYPQ (49.0 mg, 0.10 mmol) and DIPEA (1 mL) was dissolved in a mixture solution (10 mL dry DCM and 1 mL dry DMSO). The mixture was cooled in an ice bath, then solution of triphosgene (124.0 mg, 0.42 mmol) in dry DCM (1 mL) was injected with vigorous stirring, and the solution was stirred for 40 min at 0 °C, followed by removal of the ice bath. After 12 h stirring at room temperature, a solution of triphosgene (31.0 mg, 0.1 mmol) in dry DCM (1.0 mL) was injected with vigorous stirring, and the solution was stirred again for 12 h at room temperature. The resulting mixture was then evaporated to dryness under reduced pressure, and the volatiles were trapped in a liquid nitrogen trap. The resulting solution was resuspended in dry DCM and cooled to 0 °C before a solution of compound 4 (80.0 mg, 0.2 mmol) in dry DCM was added dropwise, followed by DIPEA (1 mL). The progression of the reaction was followed by TLC (DCM / MeOH, 40:1). The reaction mixture was then diluted with DCM and washed twice with brine and then treated with an aqueous solution of 1 M HCl to reach a pH of 4. The organic solvent was evaporated under reduced pressure to a yield crude solid. The solid was suspended in EtOH (2 mL), and the HYPQ was filtered off and rinsed with EtOH. The organic solvent was evaporated under reduced pressure to a yield crude solid. After that, the mixture was dissolved in TFA (3 mL) and DCM (3 mL) at 0 °C and stirred for 7 h at room temperature. After removal of the solvent from the reaction mixture under reduced pressure, the residue was washed with diethyl ether and dichloromethane, respectively, to obtain a crude yellowed solid. The crude product was purified by preparatory TLC (DCM: MeOH 10:1) to yield compound HYPQG as a yellow solid (9.1 mg, 12% yield). <sup>1</sup>H NMR (400 MHz, DMSO-*d*<sub>6</sub>) δ 8.7 (d, *J* = 8.3 Hz, 1H), 8.5 (s, 1H), 8.1 (s, 1H), 8.1 (s, 1H), 7.9 (t, *J* = 8.1 Hz, 3H), 7.9 – 7.8 (m, 1H), 7.8 – 7.8 (m, 1H), 7.7 (d, *J* = 8.7 Hz, 1H), 7.8 – 7.5 (m, 2H), 7.4 (s, 1H), 7.0 (s, 1H), 4.1 – 3.9 (m, 1H), 3.8 (s, 1H), 3.7 (s, 1H), 3.6 (s, 1H), 3.5 (s, 1H), 2.9 (s, 3H), 2.2 (s, 2H), 1.9 (s, 2H), 1.5 (s, 4H), 1.5 (s, 2H). <sup>13</sup>C NMR (101 MHz, DMSO-*d*<sub>6</sub>) δ 158.2, 153.4, 152.5, 150.6, 137.4, 136.0, 135.1, 132.5, 131.7, 130.3, 128.2, 126.7, 125.4, 125.1, 124.4, 122.7, 120.9, 119.5, 117.5, 116.2, 107.5, 83.4, 70.2, 61.2, 49.3, 29.5, 27.9, 20.5, 19.0, 15.4, 11.60. HRMS, *m/z*: calcd for [C<sub>40</sub>H<sub>34</sub>CIN<sub>7</sub>O<sub>7</sub>+H<sup>+</sup>] 760.2286, found 760.2287.

**N5-((1-((2-(6-chloro-4-oxo-3,4-dihydroquinazolin-2-yl) phenoxy) carbonyl) piperidin-2-yl) methyl) glutamine (HPQG).**

HPQ was synthesized following a previously described procedure (7, 8). To HPQ (65.0 mg, 0.24 mmol) in a two-neck flask under argon were added dry DCM (10 mL) and DIPEA (1 mL), and the mixture was left to cool in an ice bath. A solution of triphosgene (212.0 mg, 0.72 mmol) in dry DCM (3.0 mL) was injected with vigorous stirring, and the solution was stirred for 40 min at 0 °C, followed by removal of the ice bath. The resulting mixture was then evaporated to dryness under reduced pressure, and the volatiles were trapped in a liquid nitrogen trap. The resulting solution was resuspended in dry DCM and cooled to 0 °C before a solution of compound 4 (83.0 mg, 0.24 mmol) in dry DCM was added dropwise, followed by DIPEA (1.0 mL). The progression of the reaction was followed by TLC (DCM / MeOH, 40:1). The reaction mixture was then diluted with DCM and washed twice with brine and then treated with an aqueous solution of 1 M HCl to reach a pH of 4. The organic solvent was evaporated under reduced pressure to a yield a crude solid. The solid was suspended in EtOH (2 mL), and the HPQ was filtered off and rinsed with EtOH. The organic solvent was evaporated under reduced pressure to yield a crude solid. After that, the mixture was dissolved in TFA (5 mL) and DCM (5 mL) at 0 °C and stirred for 7 h at room temperature. After removal of the solvent from the reaction mixture under reduced pressure, the residue was washed with diethyl ether and dichloromethane, respectively, to obtain a crude solid. The crude product was purified by preparatory TLC (DCM: MeOH 10:1) to yield compound HPQG as a white solid (54.7 mg, 42% yield). <sup>1</sup>H NMR (400 MHz, Methanol-*d*<sub>4</sub>) δ 8.3 (d, *J* = 7.9 Hz, 1H), 7.9 (t, *J* = 7.6 Hz, 1H), 7.8 (d, *J* = 7.7 Hz, 1H), 7.8 (d, *J* = 8.2 Hz, 1H), 7.7 (d, *J* = 7.7 Hz, 1H), 7.6 (t, *J* = 7.6 Hz, 1H), 7.5 (t, *J* = 7.5 Hz, 1H), 7.4 (d, *J* = 8.0 Hz, 1H), 4.3 (s, 1H), 3.9 (t, *J* = 6.2 Hz, 1H), 3.8 (s, 1H), 3.5 (q, *J* = 7.0 Hz, 1H), 3.1 (t, *J* = 4.6 Hz, 1H), 2.4 (d, *J* = 6.9 Hz, 2H), 2.1 (d, *J* = 7.6 Hz, 2H), 1.6 – 1.5 (m, 4H), 1.4 (s, 1H), 1.2 (t, *J* = 7.0 Hz, 2H). <sup>13</sup>C NMR (101 MHz, MeOD) δ 172.9, 170.0, 162.9, 161.3, 152.3, 149.0, 134.7, 131.9, 129.8, 127.0, 126.4, 125.9, 125.6, 123.1, 120.5, 115.1, 65.5, 53.4, 52.2, 40.1, 38.1, 31.2, 25.6, 18.4, 14.0. HRMS, *m/z*: calcd for [C<sub>26</sub>H<sub>28</sub>CIN<sub>5</sub>O<sub>6</sub>+H<sup>+</sup>] 542.1806, found 542.1807.

**(E)-N5-((1-((4-(2-(4-bromophenyl)-1,2-diphenylvinyl)-2-(6-chloro-4-oxo-3,4-dihydroquinazolin-2-yl) phenoxy) carbonyl) piperidin-2-yl) methyl) glutamine (HTPQG).**

HTPQG was synthesized following a same procedure as that for HPQG. HTPQ was synthesized following a previously described procedure (9). The crude product was purified by preparatory TLC (DCM: MeOH 10:1) to yield compound HTPQG as a light yellow solid (43% yield). <sup>1</sup>H NMR (400 MHz, DMSO-*d*<sub>6</sub>) δ 12.5 (s, 1H), 8.6 (s, 3H), 8.0 (s, 3H), 7.7 (d, *J* = 7.1 Hz, 2H), 7.7 – 6.5 (m, 12H), 4.3 (s, 1H), 3.9 (s, 1H), 3.6 (s, 1H), 3.3 (s, 2H), 3.1 (s, 4H), 2.8 (m, 4H), 2.5 (s, 1H), 2.2 (s, 1H), 1.9 (s, 1H), 1.4 (m, 2H). <sup>13</sup>C NMR (101 MHz, DMSO-*d*<sub>6</sub>) δ 152.5, 147.8, 147.6, 142.8, 142.6, 140.6, 140.3, 140.16, 134.8, 134.1, 133.0, 132.4, 131.4, 131.0, 128.5, 128.3, 127.4, 126.9, 125.2, 123.1, 122.5, 120.4, 79.7, 79.4, 79.0, 65.3, 49.2, 39.4, 18.9, 15.5, 11.4. HRMS, *m/z*: calcd for [C<sub>46</sub>H<sub>41</sub>BrClN<sub>5</sub>O<sub>6</sub>+H<sup>+</sup>] 847.2009, found 847.2009.

**(E)-N5-(4-(2-(4-(dicyanomethylene)-4H-chromen-2-yl) vinyl) phenyl) glutamine (DCMG).**

DCMG was synthesized following a previously described procedure (10). <sup>1</sup>H NMR (400 MHz, DMSO-*d*<sub>6</sub>) δ 10.5 (s, 1H), 8.7 (d, *J* = 7.6 Hz, 1H), 8.5 (s, 3H), 7.9 (t, *J* = 7.4 Hz, 1H), 7.8 (d, *J* = 8.2 Hz, 1H), 7.7 (d, *J* = 4.5 Hz, 4H), 7.6 (s, 1H), 7.5 (t, *J* = 7.7 Hz, 1H), 7.4 (d, *J* = 6.1 Hz, 1H), 6.9 (s, 1H), 3.9 (t, *J* = 6.2 Hz, 1H), 2.7 – 2.5 (m, 2H), 2.2 – 2.1 (m, 2H). <sup>13</sup>C NMR (101 MHz, DMSO-*d*<sub>6</sub>) δ 171.1, 170.6, 158.8, 158.3, 153.3, 152.6, 141.6, 138.9, 135.8, 130.1, 129.6, 126.5, 125.0, 119.6, 119.1, 118.2, 117.7, 117.5, 116.4, 116.1, 106.7, 60.2, 51.9, 32.2, 26.1. HRMS, *m/z*: calcd for [C<sub>25</sub>H<sub>20</sub>N<sub>4</sub>O<sub>4</sub>+H<sup>+</sup>] 441.1563, found 441.1564.

**6-chloro-2-(1-ethyl-6-hydroxy-1,2,3,4-tetrahydroquinolin-7-yl) quinazolin-4(3H)-one (HPQ-N).**

HPQ-N was synthesized following a same procedure as that for HYPQ. <sup>1</sup>H NMR (400 MHz, DMSO-*d*<sub>6</sub>) δ 8.3 (s, 1H), 8.1 (d, *J* = 11.4 Hz, 1H), 7.8 (s, 1H), 7.6 (s, 1H), 7.4 (s, 1H), 3.2 (s, 4H), 1.6 (d, *J* = 9.5 Hz, 4H), 1.3 – 1.2 (m, 3H), 0.9 (d, *J* = 1.6 Hz, 2H). HRMS, *m/z*: calcd for [C<sub>19</sub>H<sub>18</sub>ClN<sub>3</sub>O<sub>2</sub> +H<sup>+</sup>] 356.1166, found 356.1161.

**(E)-2-(2-(4-((4-azidobenzyl)oxy)-3-(6-chloro-4-oxo-3,4-dihydroquinazolin-2-yl)styryl)-4H-chromen-4-ylidene)malononitrile (HYPQ-photoactivatable).**

Compound 9 (170.0 mg, 0.5 mmol) was added to a 50 mL flask with a reflux condenser, followed by adding 20 mL acetonitrile. Meanwhile, 210 mg (1.0 mmol) 1-azido-4-(bromomethyl) benzene and 276 mg (2.0 mmol) K<sub>2</sub>CO<sub>3</sub> were added. The resultant mixture was refluxed for 6 h, followed by extraction with DCM. The organic layers were dried over Na<sub>2</sub>SO<sub>4</sub> and concentrated under reduced pressure. Then the mixture was filtered and then diluted with DCM and washed twice with brine. The organic solvent was evaporated under reduced pressure to a yield a crude solid. The crude solid was re-dissolved in absolute EtOH (15 mL) and then 2-amino-5-chlorobenzamide (75.0 mg, 0.45 mmol) was added at room temperature. This reaction mixture was heated to reflux for 30 min, then *p*-TsOH monohydrate (0.02 equiv.) was added, and reflux was continued for 2 h. The suspension was cooled to room temperature, and then DDQ (1.01 equiv.) was added in several portions. The reaction mixture was further stirred overnight at room temperature. Next, the organic solvent was evaporated under reduced pressure to a yield a crude solid, followed by fast column chromatography to obtain the product (petroleum ether /ethyl acetate = 5:2, v / v). <sup>1</sup>H NMR (400 MHz, Chloroform-*d*) δ 8.9 (d, *J* = 8.3 Hz, 2H), 7.8 (t, *J* = 7.9 Hz, 2H), 7.6 (d, *J* = 10.3 Hz, 1H), 7.6 – 7.5 (m, 4H), 6.9 (s, 2H), 6.5 (dd, *J* = 17.4, 10.7 Hz, 2H), 6.4 (d, *J* = 17.3 Hz, 2H), 5.8 (d, *J* = 10.8 Hz, 2H), 5.4 (s, 1H), 4.7 (s, 1H). HRMS, *m/z*: calcd for [C<sub>35</sub>H<sub>20</sub>ClN<sub>7</sub>O<sub>3</sub> +H<sup>+</sup>] 622.1394, found 622.1390.

CV-Glu was synthesized following a previously described procedure (11).

Np-Glu and HTPQA were obtained from our group (12).

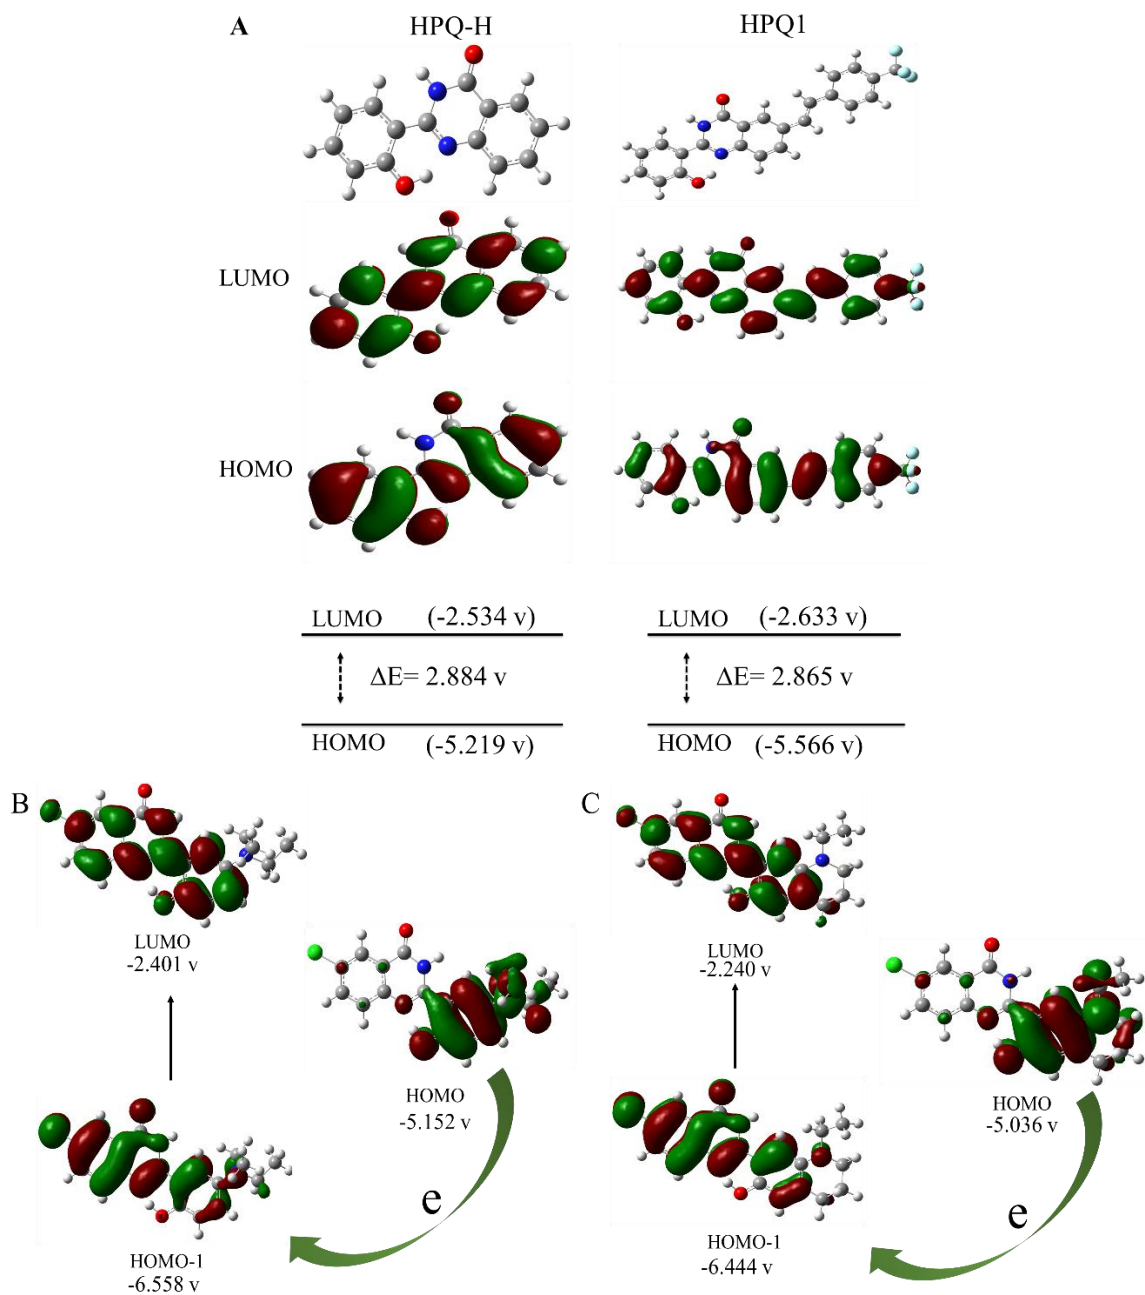

**Fig. S1.** (A) DFT-optimized structures and HOMO/LUMO energy gaps of HPQ-H and HPQ1. Frontier orbitals (LUMO/HOMO) of HPQ2 (B) and HPQ-N (C).

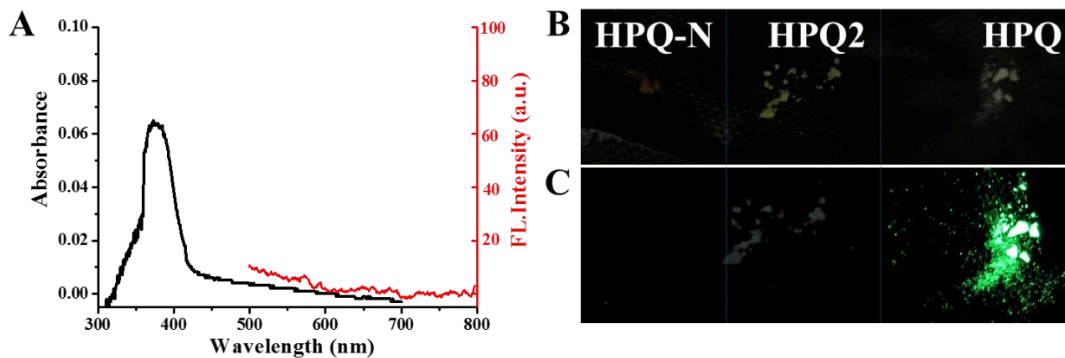

**Fig. S2.** (A) The absorbance/emission spectra of HPQ-N (10  $\mu$ M) in PBS containing 1% DMSO and 10% glycerol. The solid-state fluorescence of HPQ, HPQ2 and HPQ-N before (B) and after (C) under UV lamp at 365 nm irradiation.

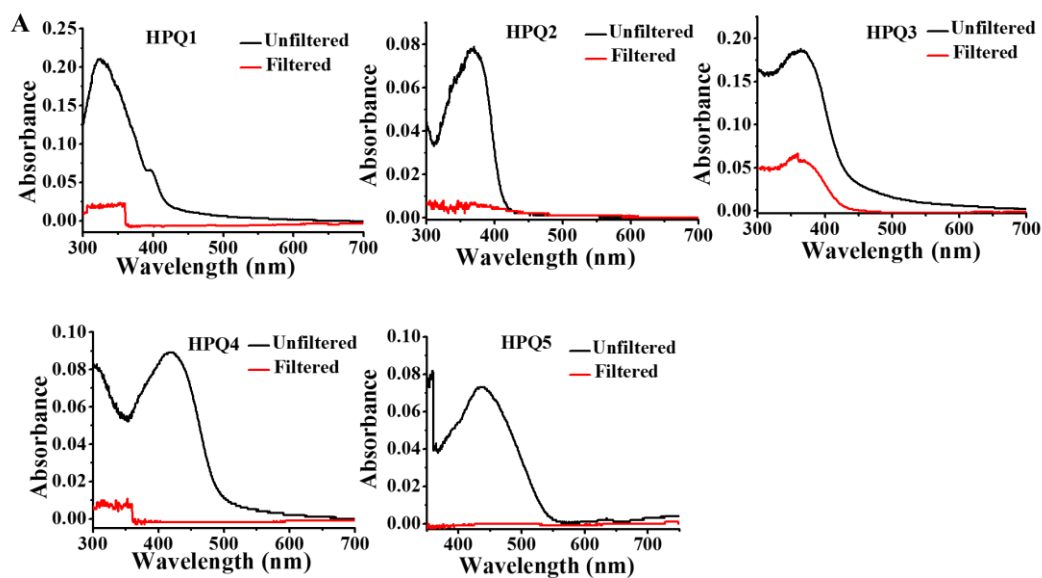

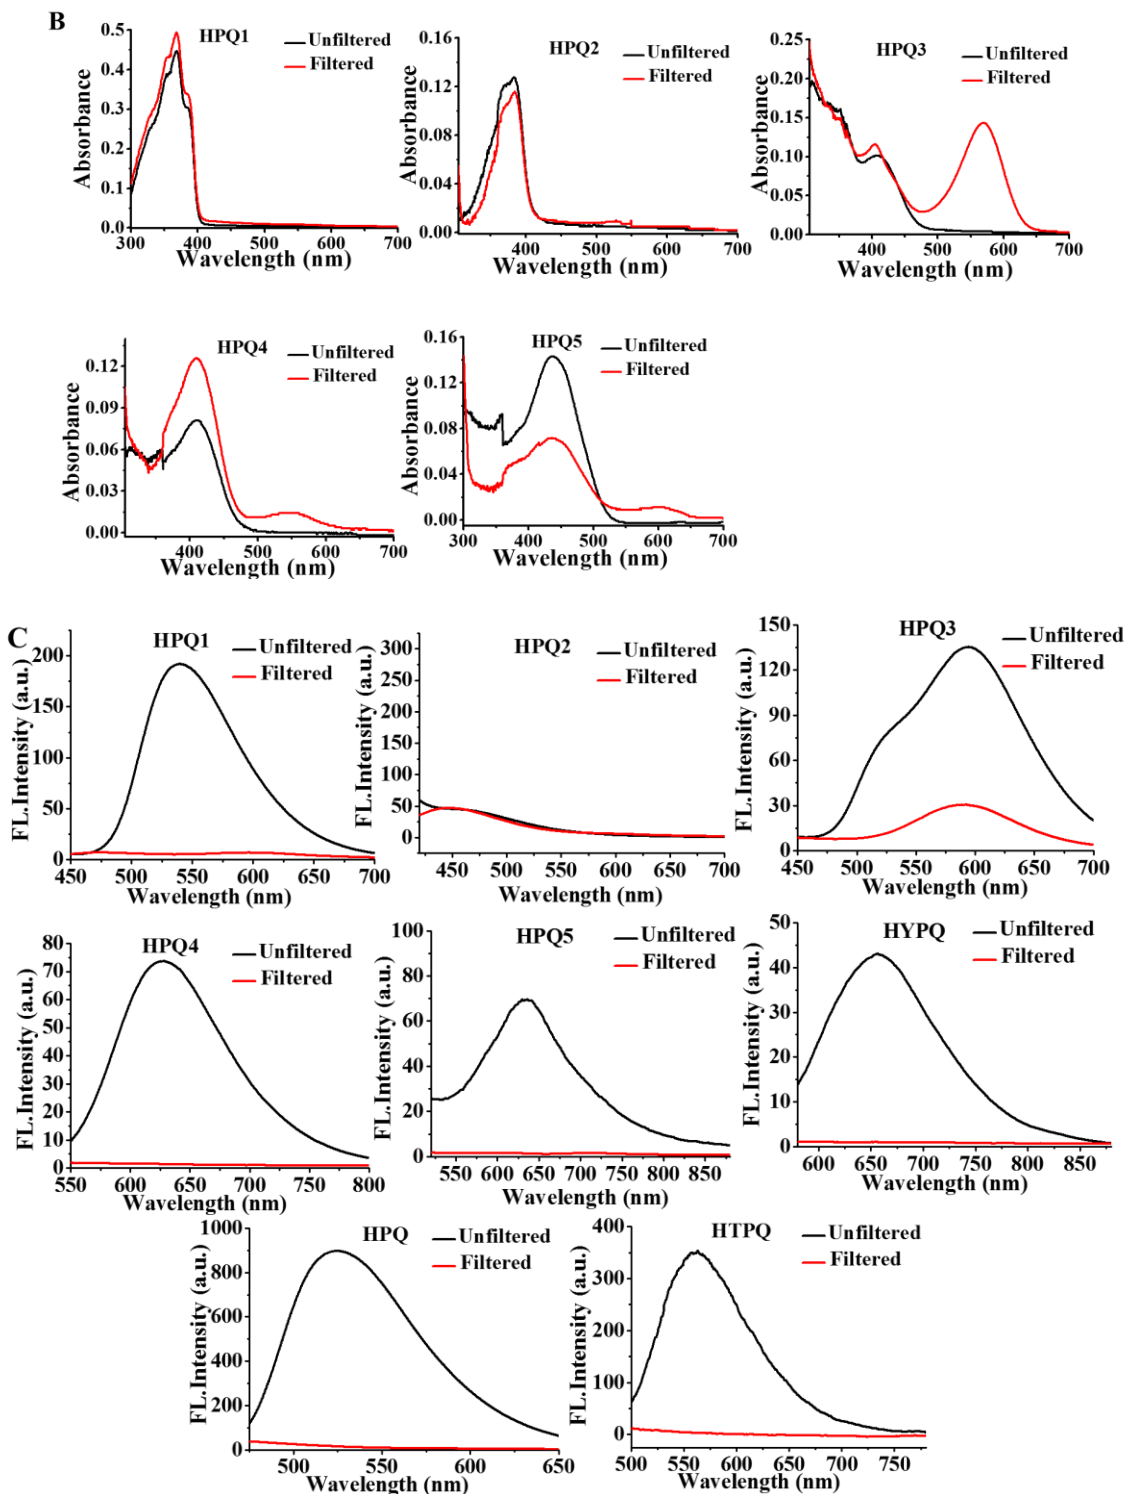

**Fig. S3.** The absorbance spectra of all 10  $\mu\text{M}$  compounds (HPQ1, HPQ2, HPQ3, HPQ4, HPQ5,) in PBS containing 1% DMSO and 10% glycerol (A) or in DCM (B). The fluorescence spectra of all 10  $\mu\text{M}$  compounds (HPQ1, HPQ2, HPQ3, HPQ4, HPQ5, HYPQ, HPQ, HTPQ) in PBS containing 1% DMSO and 10% glycerol. The black lines and red lines indicated the absorbance/fluorescence spectra intensity change of these compounds before and after filtration.

|      | $\lambda_{\text{Abs/nm}}$ | $\lambda_{\text{Em/nm}}$ | Stokes shift/nm |
|------|---------------------------|--------------------------|-----------------|
| HPQ  | 355                       | 515                      | 160             |
| HPQ1 | 395                       | 535                      | 140             |
| HPQ2 | 370                       | /                        | /               |
| HPQ3 | 385                       | 590                      | 205             |
| HPQ4 | 409                       | 625                      | 216             |
| HPQ5 | 445                       | 636                      | 191             |
| HYPQ | 450                       | 650                      | 200             |

**Table S1:** The data analysis of absorption/emission of these solid-state fluorophores.

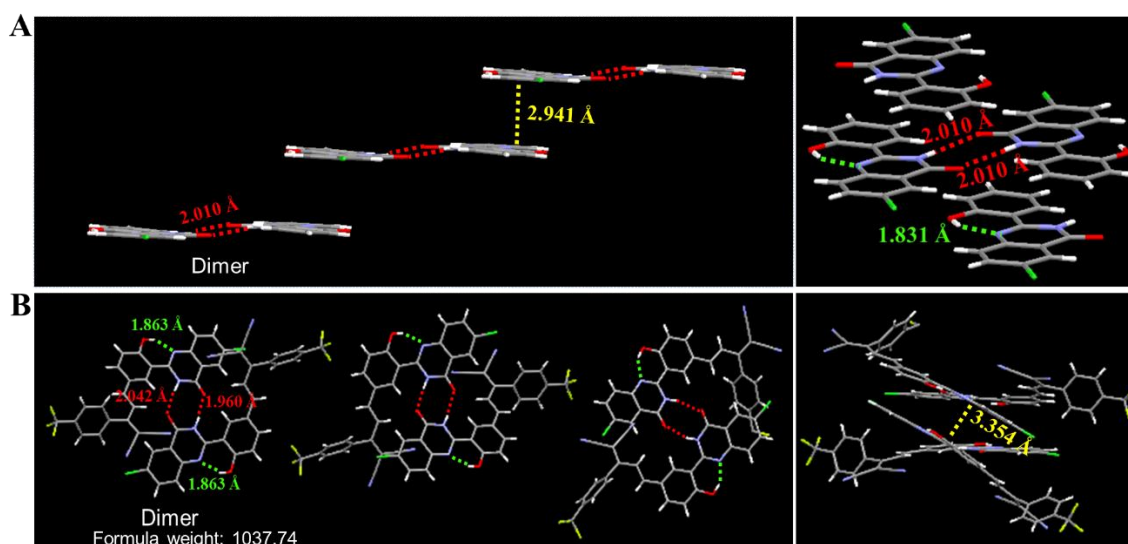

**Fig. S4.** Crystal structures of HPQ (CCDC: 2045408) (A) and HPQ4 (CCDC: 2045423) (B). The green dotted lines indicated the intramolecular hydrogen bond, and the red dotted lines indicated intermolecular H-bonding interactions. The yellow dotted lines indicated the distance between the two dimers in crystals respectively.



| Solid-state fluorochrome | Optimized structure                                                                 | The graphical presentation of the twisted angle between substituted groups and HPQ structure | Twist angle |
|--------------------------|-------------------------------------------------------------------------------------|----------------------------------------------------------------------------------------------|-------------|
| HPQ1                     |    |            | 6.51°       |
| HPQ2                     |   |           | 55.96°      |
| HPQ3                     |  |          | 1.46°       |
| HPQ4                     |  |          | 62.34°      |
| HPQ5                     |  |          | 70.74°      |
| HYPQ                     |  |          | 0.02°       |

**Table S2:** The DFT-optimized structures of these solid-state fluorophores.

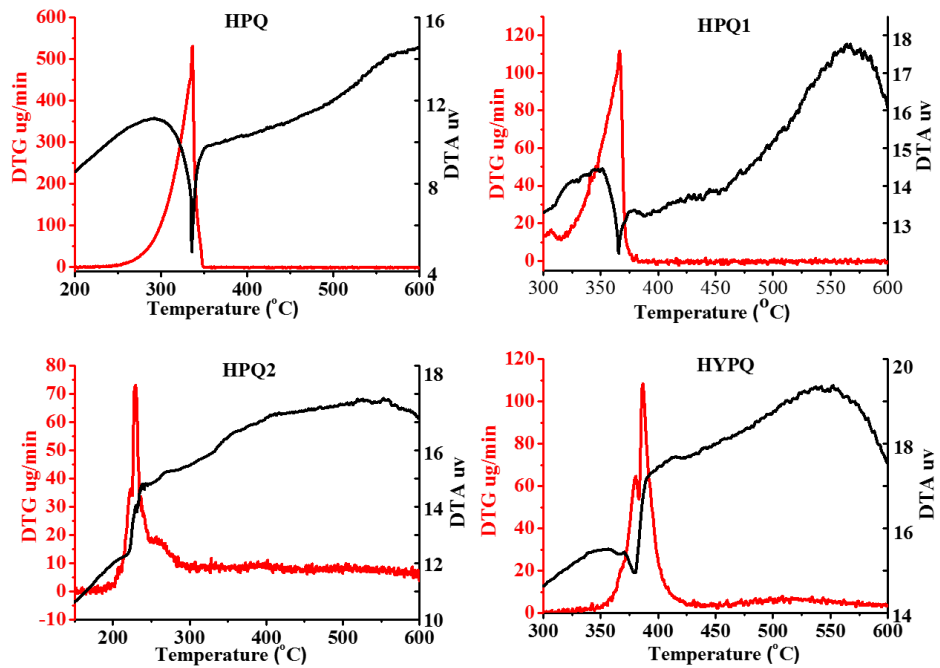

**Fig. S5.** The DTA (black) and TG (red) curves of compounds HPQ, HPQ1, HPQ2 and HYPQ. The DTA measurement was performed with a HENGJIU HCT-4 instrument.

|      | Chemical Structure | Melting point (°C) |
|------|--------------------|--------------------|
| HPQ  |                    | 336.16             |
| HPQ1 |                    | 362.31             |
| HPQ2 |                    | 231.26             |
| HPQ3 |                    | 364.15             |
| HPQ4 |                    | 123.24             |
| HPQ5 |                    | 240.60             |
| HYPQ |                    | 386.79             |

**Table S3:** The melting point of these solid-state fluorophores was obtained from the TG-DTA curves.

| fluorophore | LogP  |
|-------------|-------|
| HPQ1        | 6.06  |
| HPQ2        | 4.27  |
| HPQ3        | -0.07 |
| HPQ4        | 6.57  |
| HPQ5        | 3.98  |
| HYPQ        | 5.38  |

**Table S4:** The distribution coefficient (logP) of these solid-state fluorophores was carried out using MarvinSketch 15.6.29 (ChemAxon, Budapest, Hungary).

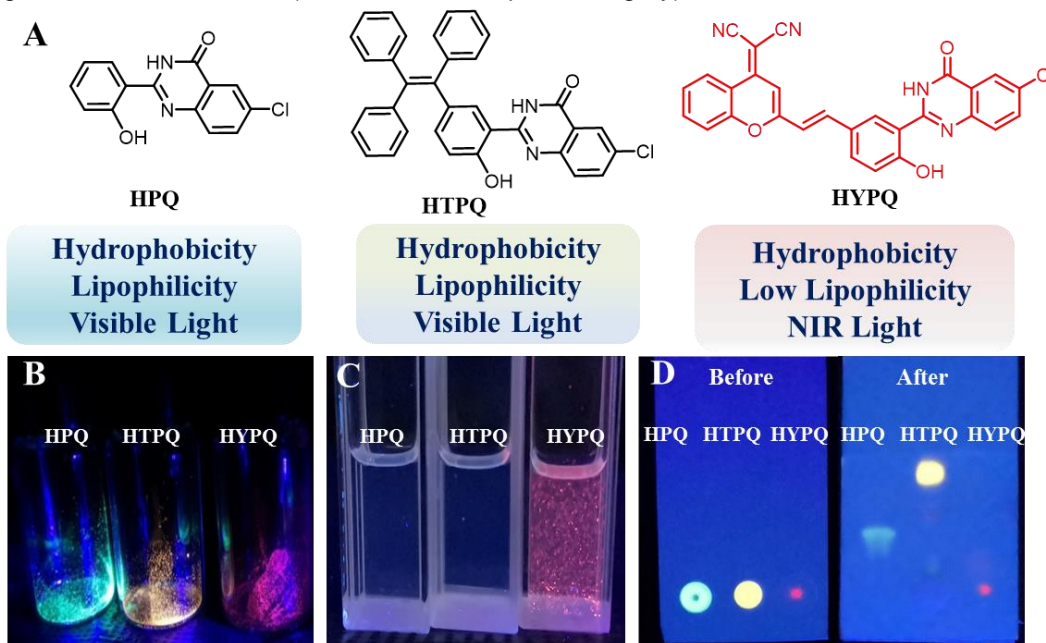

**Fig. S6.** (A) Molecular structures of HPQ, HTPQ and HYPQ. Based on the traditional solid-state fluorophore HPQ, we developed a novel type of omni-insoluble NIR solid-state fluorochrome, HYPQ. (B) Solid-state fluorescent photographs of HPQ, HTPQ and HYPQ in powder samples. (C)

After HPQ, HTPQ and HYPQ were respectively dispersed in dichloromethane solutions (10  $\mu\text{M}$ ), solid-state fluorescent photos were obtained. HPQ and HTPQ were liposoluble, thereby dissolving absolutely without solid-state fluorescence. (D) HPQ, HTPQ and HYPQ were chromatographed by TLC with pure dichloromethane. By the omni-insoluble property of HYPQ, it could not be separated on silica gel plates.

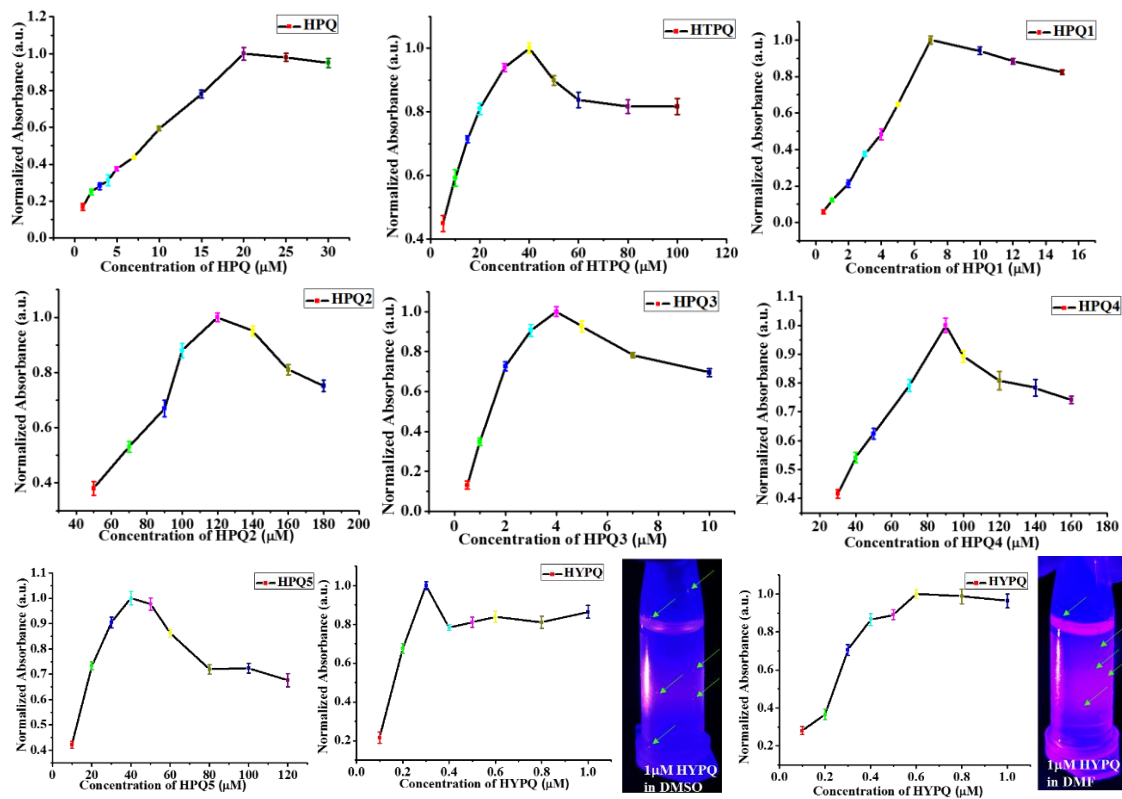

**Fig. S7.** The measurement of the solubility of these solid-state fluorophores in DMSO solutions by using UV absorbance. Inset: Photos of HYPQ (1  $\mu\text{M}$ ) in DMSO and DMF solutions respectively under UV lamp at 365 nm excitation.

|                    |                                             |
|--------------------|---------------------------------------------|
| Planarity          | HPQ5 HPQ4 HPQ2 HPQ1 HPQ3 HYPQ               |
|                    | Bad <span style="float: right;">Good</span> |
| Melting point      | HPQ4 HPQ2 HPQ5 HPQ1 HPQ3 HYPQ               |
|                    | Low <span style="float: right;">High</span> |
| Solubility in DMSO | HPQ2 HPQ4 HPQ5 HPQ1 HPQ3 HYPQ               |
|                    | High <span style="float: right;">Low</span> |

**Table S5:** The comparison of characters of these solid-state fluorochromes. The data analysis of planarity, melting point and solubility came from Table S2, Table S3 and Fig. S7 respectively.

| Solvent  | $\lambda_{\text{Abs/nm}}$ | $\epsilon(\text{M}^{-1} \text{cm}^{-1})$ | $\lambda_{\text{Em/nm}}$ | $\Phi_f$ | Stokes shift/nm |
|----------|---------------------------|------------------------------------------|--------------------------|----------|-----------------|
| DMSO     | 585                       | 28000                                    | 650                      | 0.10     | 65              |
| glycerol | 450                       | 3000                                     | 650                      | 0.19     | 200             |

The quantum yields were determined using cresol purple as reference ( $\Phi_f = 0.58$  in ethanol).

| Solid-State | $\lambda_{\text{Abs/nm}}$ | $\lambda_{\text{Em/nm}}$ | $\Phi_f(\%)$ | Stokes shift/nm | $\tau$ (ns) |
|-------------|---------------------------|--------------------------|--------------|-----------------|-------------|
| Powder      | 450                       | 650                      | 0.38         | 200             | 0.62        |

**Table S6:** The photophysical characterization of HYPQ.

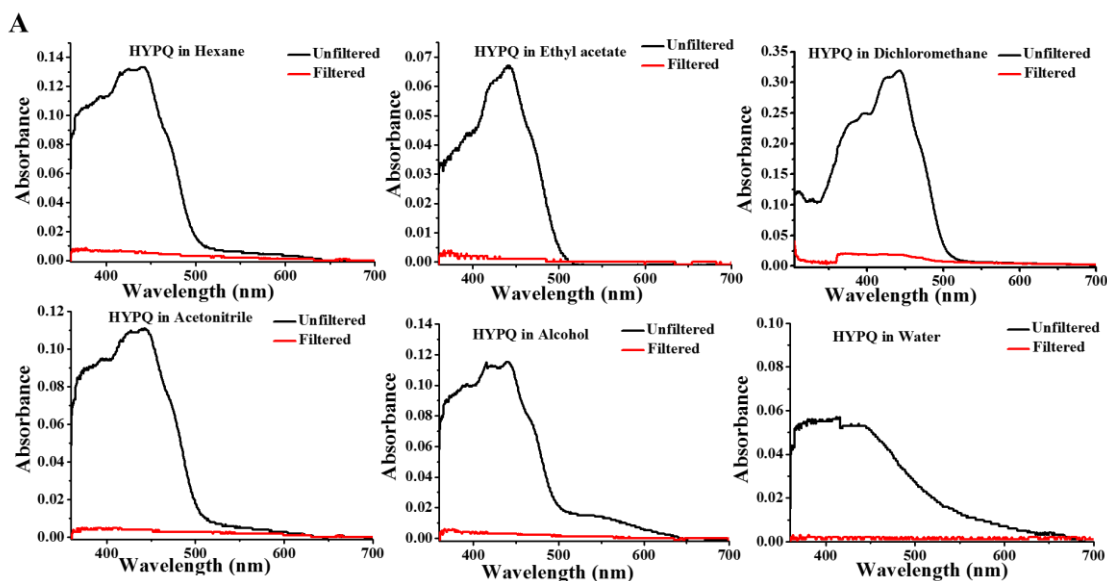

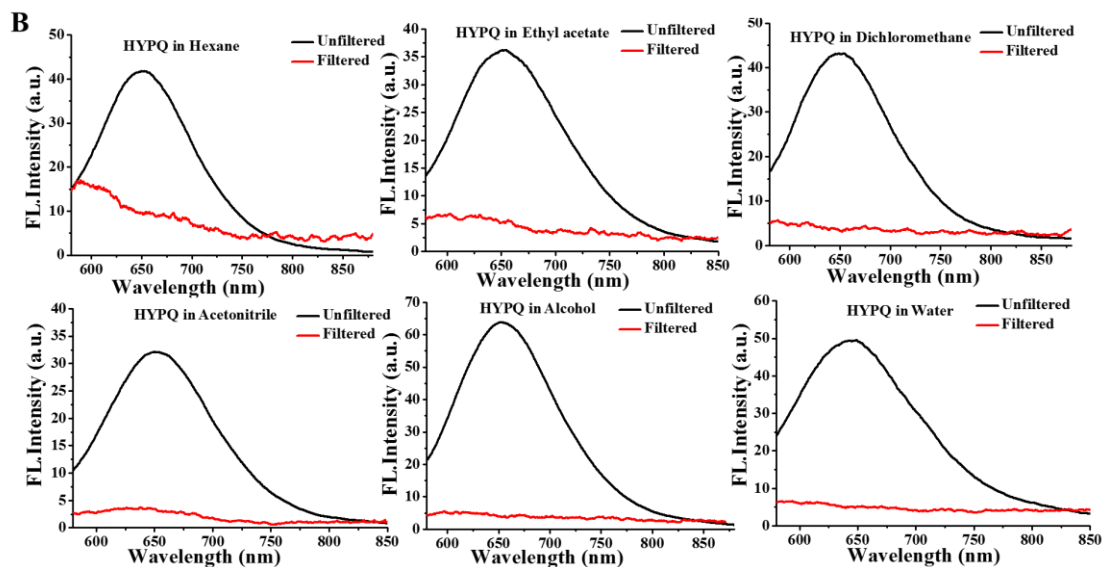

**Fig. S8.** The absorbance/fluorescence spectra of HYPQ (10 μM) in different solvents. The black lines and red lines indicated the absorbance/fluorescence spectra intensity change of these compounds before and after filtration.

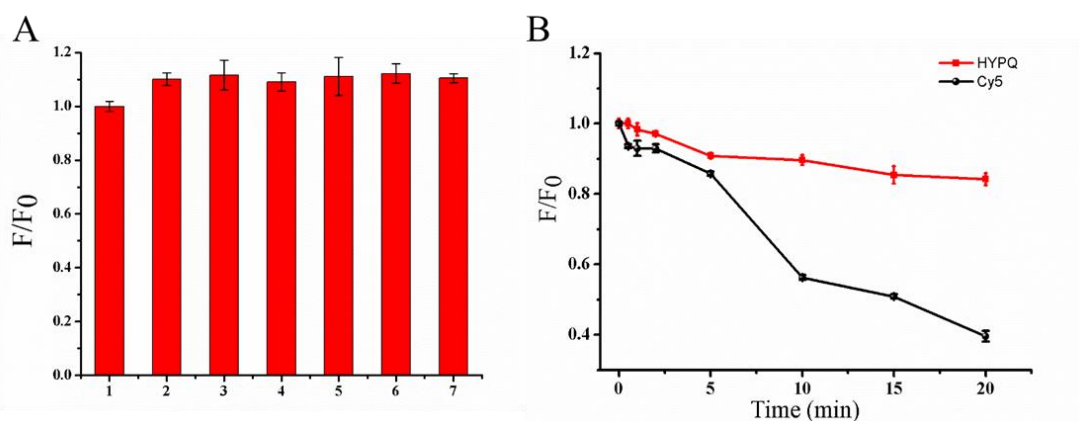

**Fig. S9.** (A) Fluorescence responses of HYPQ upon treatment with various ROS/RNS (100 μM). 1. Blank, 2. O<sub>2</sub><sup>-</sup>, 3. H<sub>2</sub>O<sub>2</sub>, 4. ClO<sup>-</sup>, 5. S<sup>2-</sup>, 6. S<sub>2</sub><sup>2-</sup>, 7. SO<sub>3</sub><sup>2-</sup>. Fluorescence spectra were measured at 650 nm with an excitation at 450 nm. (B) Photostability of HYPQ and Cy5 in TBS buffer solution (pH 7.4, 1% glycerol). Samples were continuously irradiated by white light (50 W) in ice-bath condition.

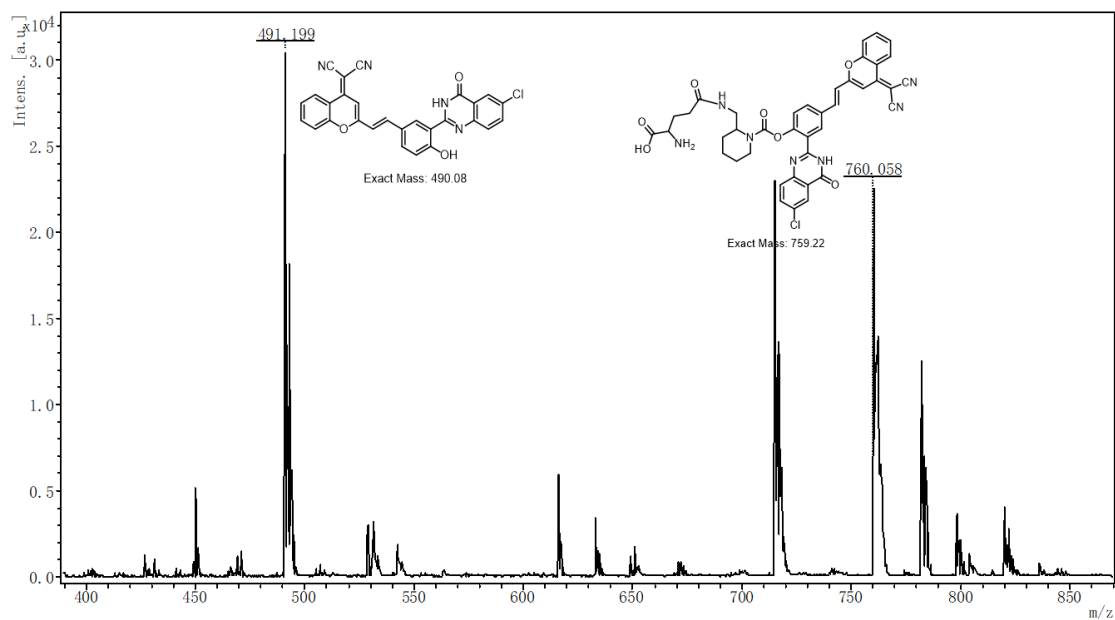

**Fig. S10.** The MALDI-TOF/MS spectrum of probe HYPQG in the presence of GGT.

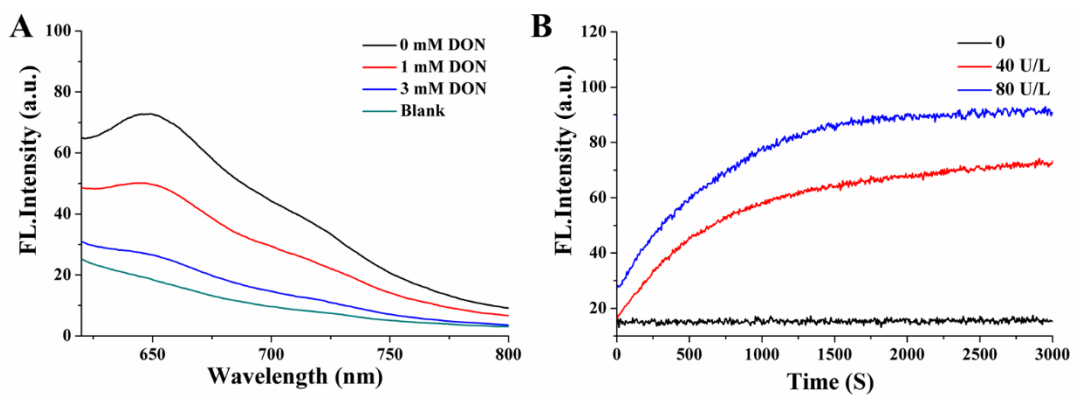

**Fig. S11.** (A). Fluorescence emission spectra of HYPQG (5 μM) in the presence of GGT and inhibitors (pH=7.4 TBS-buffered aqueous at 37 °C). DON was incubated for 30 min, and then HYPQG was added for another 40 min. (B). Fluorescence intensity of HYPQG (5 μM) vs. reaction time in the presence of various concentrations of GGT (0 U/L, 40 U/L, 80 U/L). The measurements were performed at 37 °C in 10 mM TBS (pH 7.4) with  $\lambda_{ex/em} = 450/650$  nm.



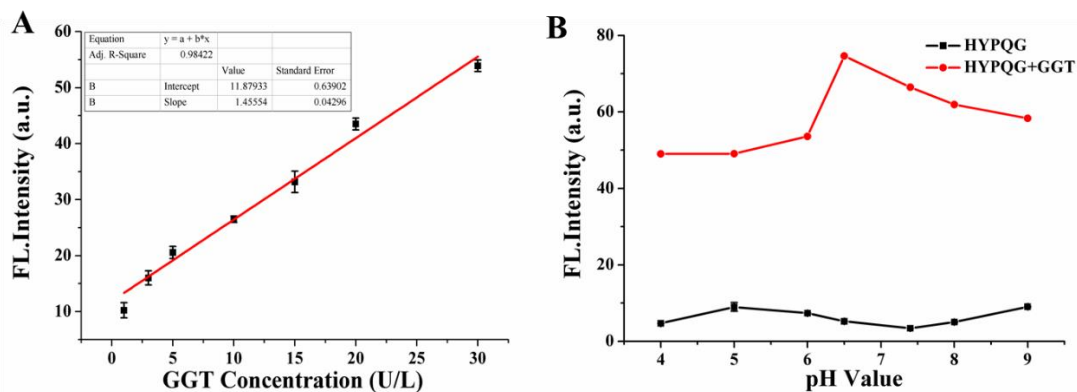

**Fig. S12.** (A) The linearity between fluorescence intensities at 650 nm and increasing concentrations of GGT (1-30 U/L). (B) Fluorescence intensity (650 nm) vs. pH value. Effect of pH on the fluorescence intensity of black line, HYPQG (5  $\mu$ M); red line, HYPQG (5  $\mu$ M) with GGT (80 U/L) in buffered/DMSO/glycerol (94/5/1, v/v/v, pH= 4.0 - 9.0, 10 mM).  $\lambda_{ex}$  =450 nm.

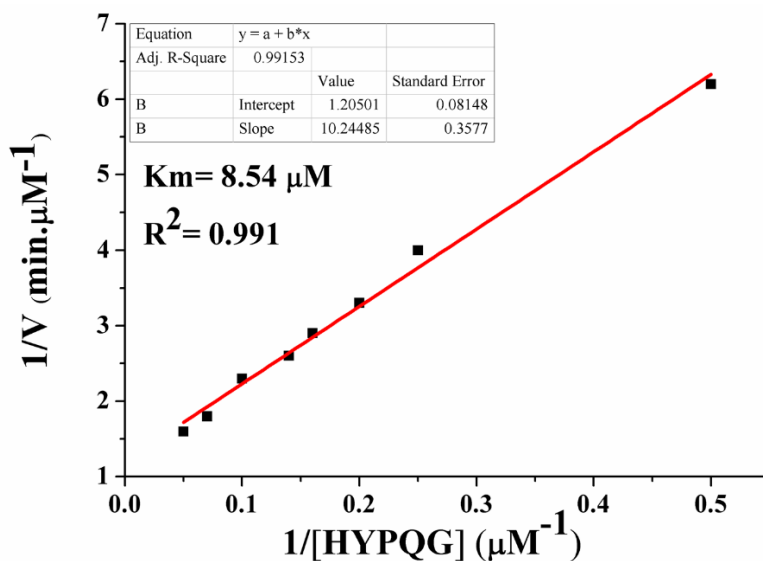

**Fig. S13.** Lineweaver-Burk plot for the enzyme-catalyzed reaction of HYPQG. The Michaelis-Menten equation was described as  $V = V_{max} [\text{probe}] / (K_m + [\text{probe}])$ , where V is the initial reaction rate, [probe] is the probe concentration (substrate), and  $K_m$  is the Michaelis constant. Conditions: 80 U/L GGT, 2-20  $\mu$ M of HYPQG. The measurements were performed at 37  $^{\circ}$ C with  $\lambda_{ex/em}$  = 450/650 nm.

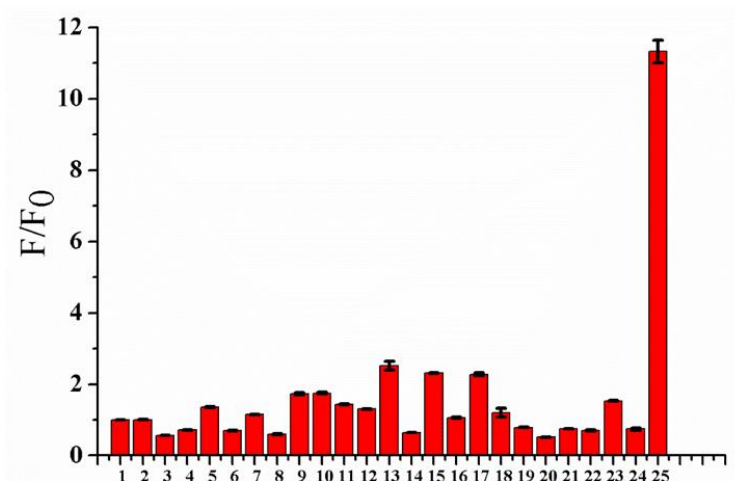

**Fig. S14.** Fluorescence responses of HYPQG (5  $\mu\text{M}$ ) toward other substances (100  $\mu\text{M}$  for 1-18): 1. L-lysine, 2. L-glutamate, 3. L-valine, 4. L-isoleucine, 5. L-threonine, 6. L-tyrosine, 7. L-tryptophan, 8. phenylalanine, 9. arginine, 10. glucose, 11.  $\text{CaCl}_2$ , 12. BSA, 13.  $\text{NaClO}$ , 14.  $\text{H}_2\text{O}_2$ , 15.  $\text{Zn}(\text{NO}_3)_2$ , 16.  $\text{FeSO}_4$ , 17.  $\text{FeCl}_3$ , 18.  $\text{MgCl}_2$ , 19. GSH (5 mM), 20. cathepsin B (100 U/L), 21. monoamine oxidase (10  $\mu\text{g}/\text{mL}$ ), 22. alkaline phosphatase (100 U/L), 23. leucine aminopeptidase (50 U/L), 24. sulfatase (1000 U/L), 25. GGT (80 U/L). The test solution was kept in TBS-buffered (10 mM,  $\text{pH}=7.4$ ) aqueous DMSO solution (94:5, v/v, 1% glycerol) at 37  $^\circ\text{C}$  for 40 min before measurement.  $\lambda_{\text{em}}=450$  nm.

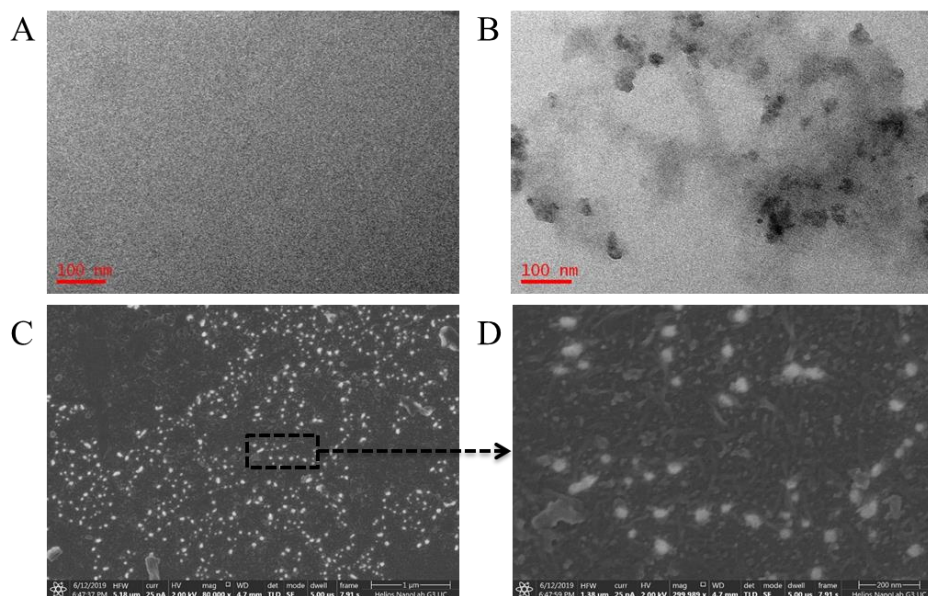

**Fig. S15.** TEM photos of HYPQG (10  $\mu\text{M}$ ) before (A) and after (B) reaction with GGT (150 U/L). SEM photos of HYPQG (10  $\mu\text{M}$ ) reaction with GGT at the scale of 1  $\mu\text{m}$  (C) and 200 nm (D).

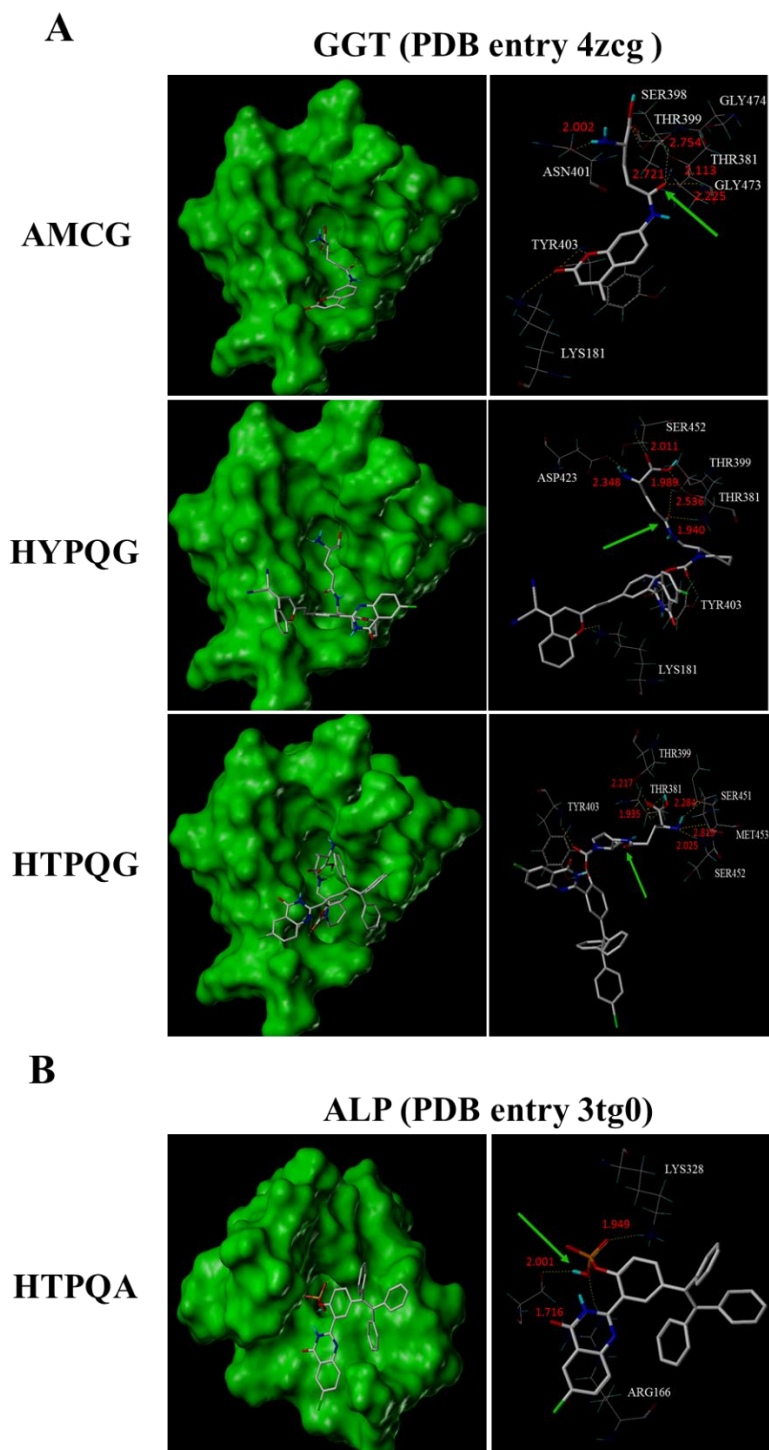

**Fig. S16.** (A) The molecular docking modes of AMCG, HYPQG and HTPQG in the ligand binding pocket of gamma glutamyltransferase (GGT). (B) The molecular docking mode of HTPQA in the ligand binding pocket of alkaline phosphatase (ALP). The interaction of hydrogen bonds between the probes and the protein structure was displayed as dotted lines. The hydrogen bond lengths were denoted in red and reaction sites were indicated by green arrows.

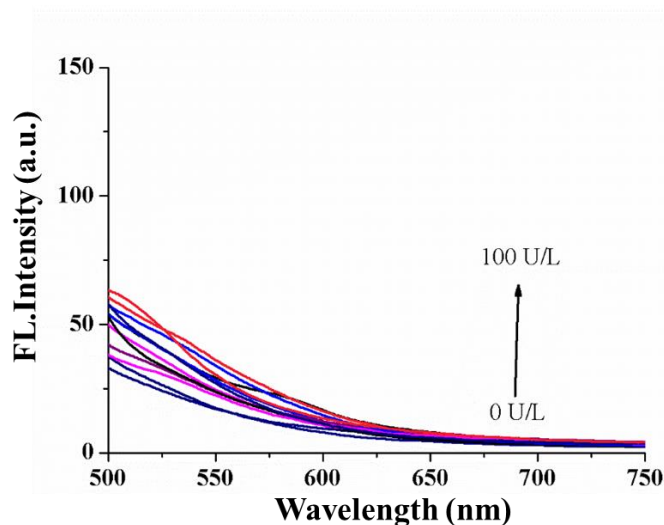

**Fig. S17.** Fluorescence emission spectra of HTPQG (5  $\mu$ M) in the presence of different concentrations of GGT (0, 3, 5, 10, 20, 30, 50, 60, 80, 90, and 100 U/L) in TBS-buffered (10 mM, pH=7.4) aqueous DMSO solution (5%) at 37  $^{\circ}$ C.

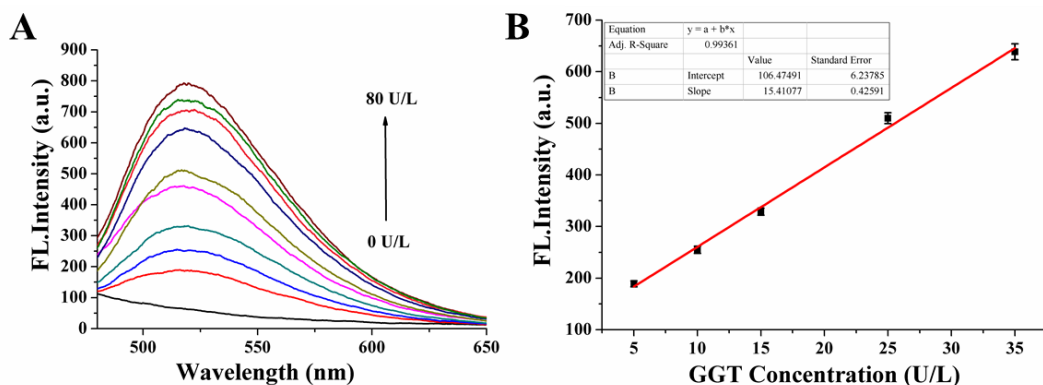

**Fig. S18.** (A) The fluorescence emission spectra of HPQG (5  $\mu$ M) in the presence of different concentrations of GGT (0, 1, 5, 10, 15, 25, 35, 50, 70, and 80 U/L) in TBS-buffered (10 mM, pH=7.4) aqueous DMSO solution (5%) at 37  $^{\circ}$ C. (B) The linearity between fluorescence intensities at 510 nm and increasing concentrations of GGT (5-35 U/L).

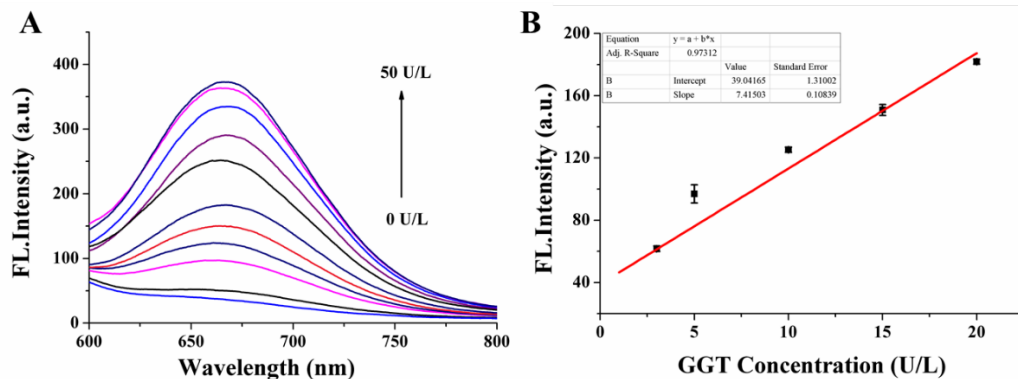

**Fig. S19.** (A) Fluorescence emission spectra of DCMG (5  $\mu$ M) in the presence of different concentrations of GGT (0, 3, 5, 10, 15, 20, 25, 30, 40, 45, and 50 U/L) in TBS-buffered (10 mM, pH=7.4) aqueous DMSO solution (5%) at 37  $^{\circ}$ C. (B) The linearity between fluorescence intensities at 650 nm and increasing concentrations of GGT (5-20 U/L).

pH=7.4) aqueous DMSO solution (5%) at 37 °C. (B) The linearity between fluorescence intensities at 660 nm and increasing concentrations of GGT (3-20 U/L).

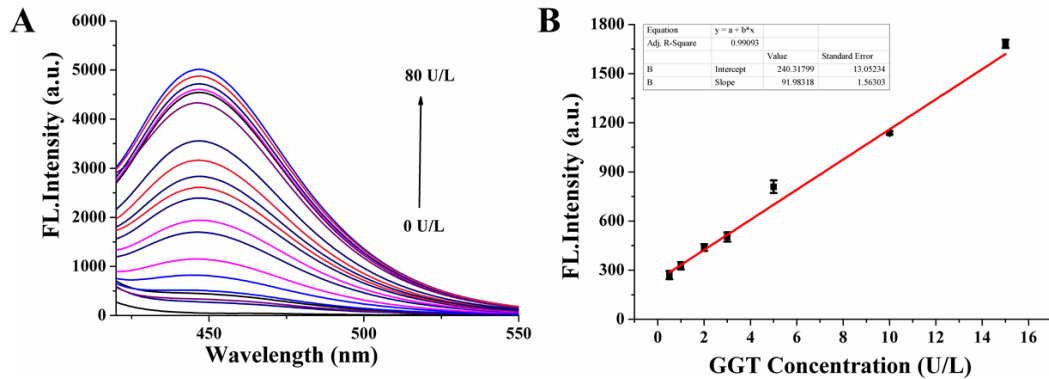

**Fig. S20.** (A) Fluorescence emission spectra of AMCG (5  $\mu$ M) in the presence of different concentrations of GGT (0, 0.5, 1, 2, 3, 5, 10, 15, 20, 25, 30, 35, 40, 45, 50, 55, 60, 70, and 80 U/L) in TBS-buffered (10 mM, pH=7.4) aqueous DMSO solution (5%) at 37 °C. (B) The linearity between fluorescence intensities at 450 nm and increasing concentrations of GGT (0.5-15 U/L).

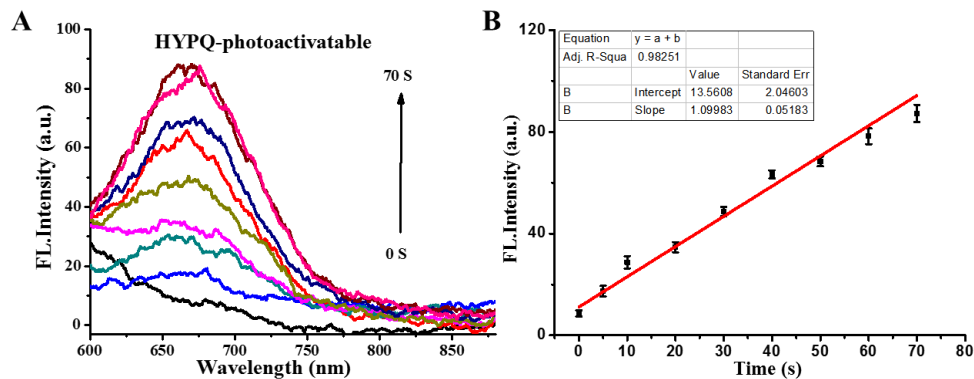

**Fig. S21.** (A) Fluorescence emission spectra of HYPQ-photoactivatable (10  $\mu$ M) after irradiation by 365 nm light for 5 S, 10 S, 20 S, 30 S, 40 S, 50 S, 60 S and 70 S in glycerol/ PBS/ DMSO = 5/4/1. (B) The linearity between fluorescence intensities at 650 nm and increasing irradiation time under 365 nm light.

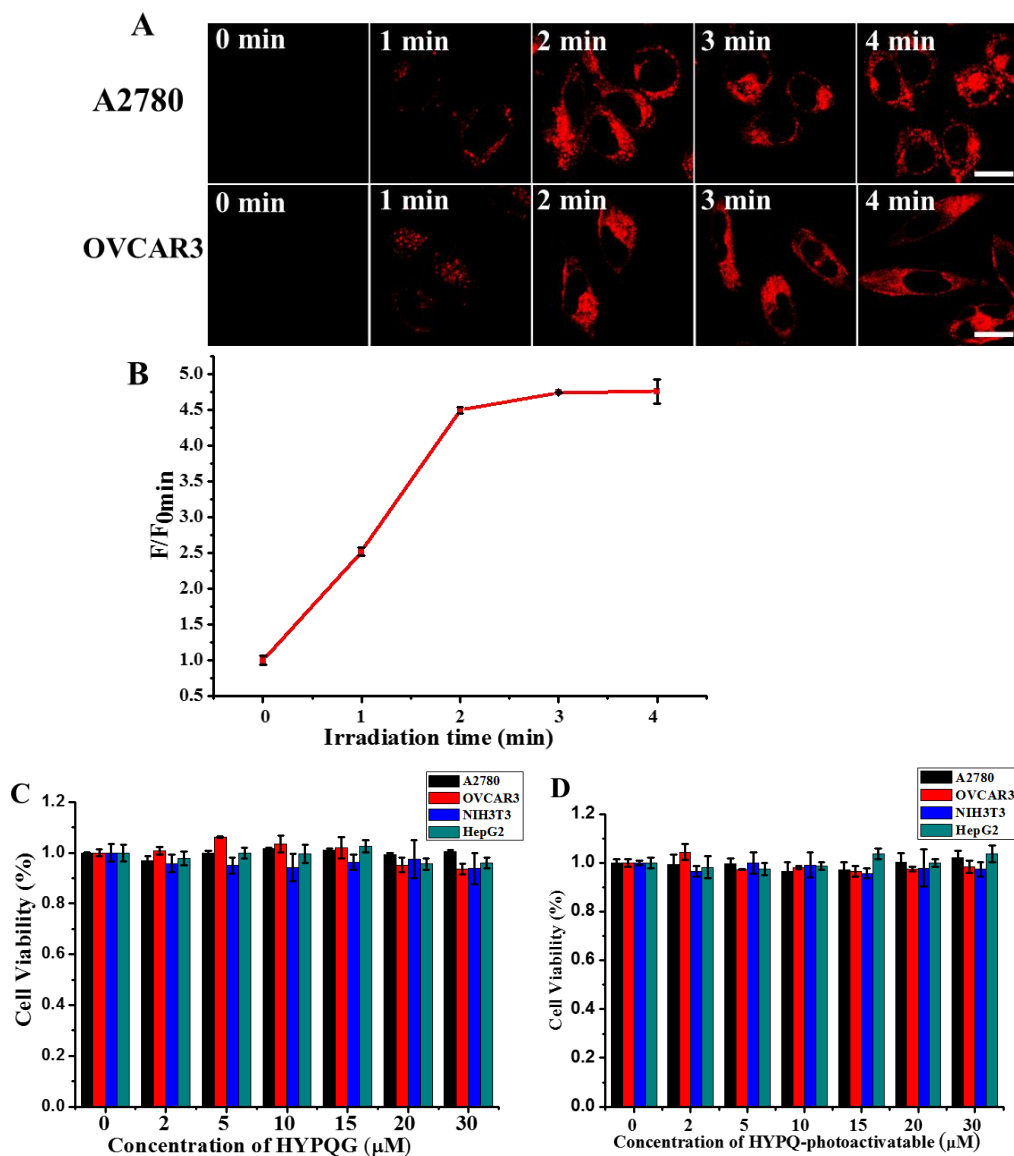

**Fig. S22.** (A) Real-time imaging of living cells incubated with HYPQ-photoactivatable (5  $\mu\text{M}$ ) in DPBS buffer after the different irradiation times under blue light (450 nm–470 nm). (B) Average intensity found in Fig. S22A; that of  $t=0$  min was defined as 1.0.  $\lambda_{\text{ex}} = 488$  nm,  $\lambda_{\text{em}} = 584\text{-}676$  nm. Scale bar = 20  $\mu\text{m}$ . (C) Cytotoxicity of HYPQG toward A2780, OVCAR3, NIH3T3 and HepG2 cells. (D) Cytotoxicity of HYPQ-photoactivatable toward A2780, OVCAR3, NIH3T3 and HepG2 cells. Cell viability was measured by MTS assay, and the results are reported as percentage relative to untreated cells.

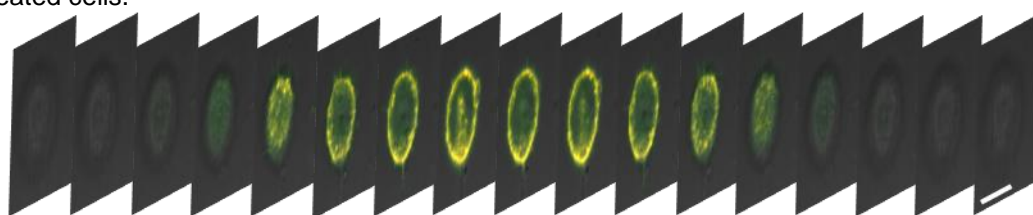

**Fig. S23.** Z-stack images of the 3-D spheroid from 0-60  $\mu\text{m}$  after A2780 cells were incubated with HYPQG and Memb-Tracker Green. Scale bar: 20  $\mu\text{m}$

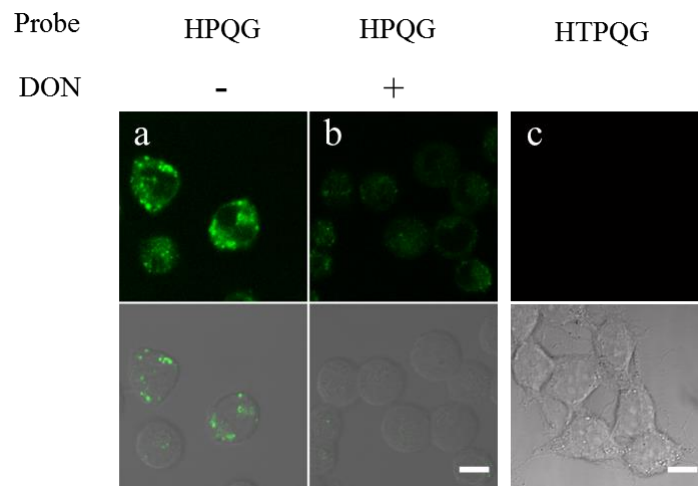

**Fig. S24.** Confocal images of GGT in A2780 cells treated with the HPQG probe (a), and HTPQG (c) for 40 min. The cells were pretreated with DON (1 mM) for 1 h before incubation with HPQG for 40 min (b). Scale bar: 20  $\mu$ m

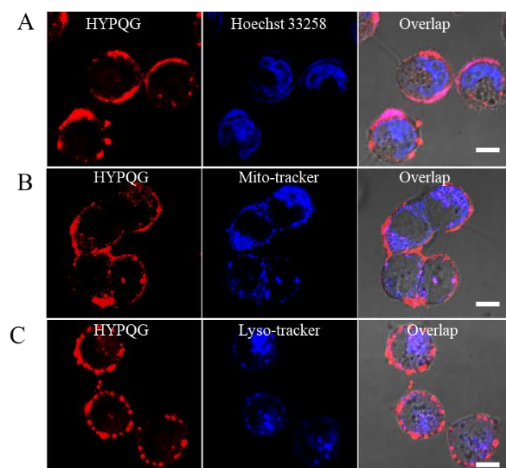

**Fig. S25.** Co-incubation with organelle trackers. A2780 cells were incubated with HYPQG (5  $\mu$ M) for 40 min and then co-stained with 5  $\mu$ M Hoechst33258, Mito-Tracker Blue and Lyso-Tracker for 10 min, respectively. (A) Nuclei staining: Hoechst33258,  $\lambda_{ex}$  = 405 nm,  $\lambda_{em}$  = 425-475 nm; (B) Mito-Tracker:  $\lambda_{ex}$  = 405 nm,  $\lambda_{em}$  = 425-475 nm; (C) Lyso-Tracker:  $\lambda_{ex}$  = 405 nm,  $\lambda_{em}$  = 425-475 nm. Scale bar: 20  $\mu$ m

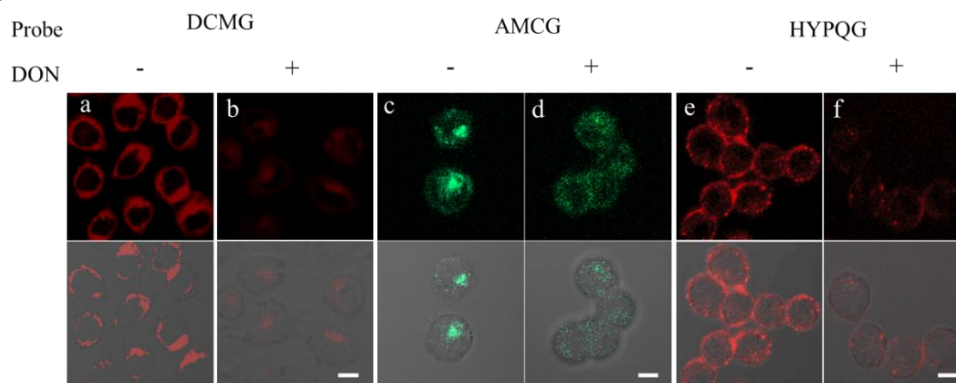

**Fig. S26.** Confocal images of GGT in A2780 cells treated with the DCMG (a), AMCG (c) and HYPQG (e) probes, or pretreated with DON (1 mM) for 1 h before incubation with DCMG (b), AMCG

(d) and HYPQG (f) for 40 min. (DCMG:  $\lambda_{ex}$  = 488 nm,  $\lambda_{em}$  = 663–738 nm; AMCG:  $\lambda_{ex}$  = 405 nm,  $\lambda_{em}$  = 425–475 nm; HYPQG:  $\lambda_{ex}$  = 488 nm,  $\lambda_{em}$  = 584–676 nm). Scale bar: 20  $\mu$ m

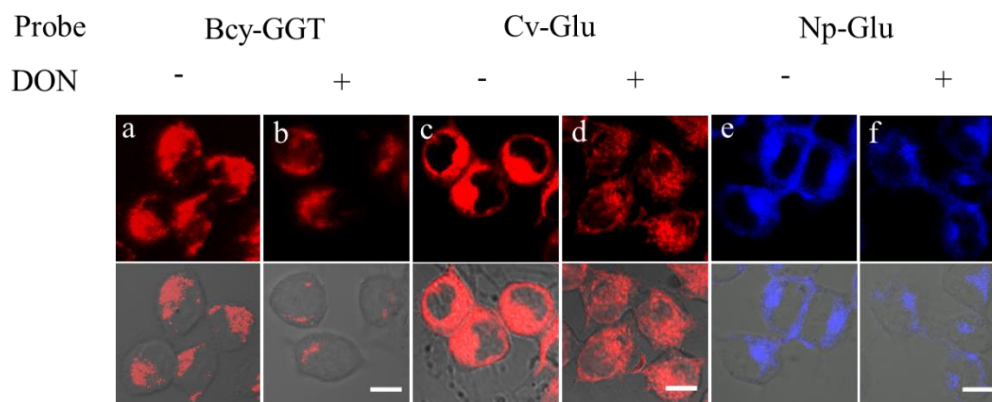

**Fig. S27.** Confocal images of GGT in A2780 cells treated with the Bcy-GGT (a), Cv-Glu (c) and Np-Glu (e) probes, or pretreated with DON (1 mM) for 1 h before incubation with Bcy-GGT (b), Cv-Glu (d) and Np-Glu (f) for 40 min. (Bcy-GGT:  $\lambda_{ex}$  = 640 nm,  $\lambda_{em}$  = 663–738 nm; Cv-Glu:  $\lambda_{ex}$  = 560 nm,  $\lambda_{em}$  = 584–676 nm; Np-Glu:  $\lambda_{ex}$  = 405 nm,  $\lambda_{em}$  = 425–475 nm). Scale bar: 20  $\mu$ m

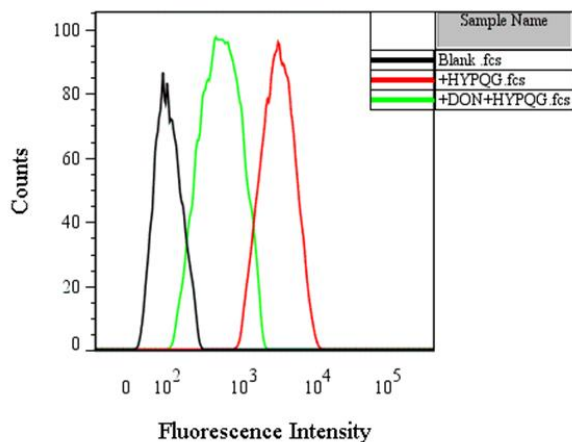

**Fig. S28.** Flow cytometric analysis of intact A2780 and A2780 loaded HYPQG treated with DON (1 mM). The X-axis is the Cy5 channel that captured the fluorescence of HYPQG ( $\lambda_{ex}$  = 488 nm).



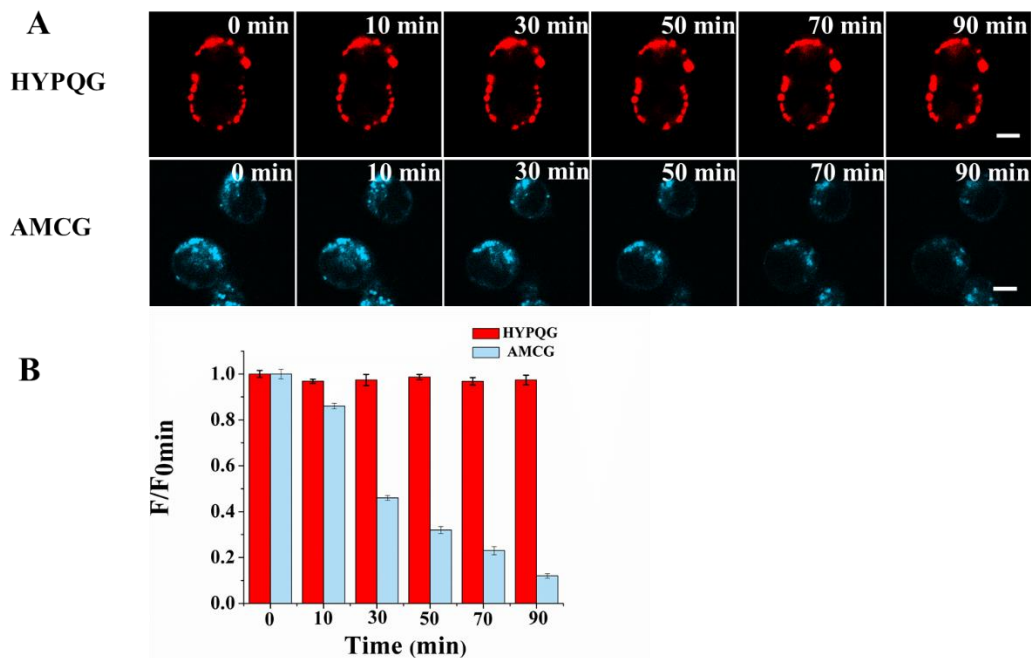

**Fig. S29.** Anti-diffusion performance of HYPQG was investigated by comparing with the commercially available AMCG probe. (A) A2780 cells were incubated with HYPQG (top) and AMCG (bottom) for 40 min, respectively, and then washed with DPBS, followed by real-time images obtained every 10 min for a total of 90 min. HYPQG:  $\lambda_{ex} = 488$  nm,  $\lambda_{em} = 584$ -676 nm; AMCG:  $\lambda_{ex} = 405$  nm,  $\lambda_{em} = 425$ -475 nm. (B) Average fluorescence intensity found in Fig. S29A; initial intensity was defined as 1.0. Scale bar = 20  $\mu$ m

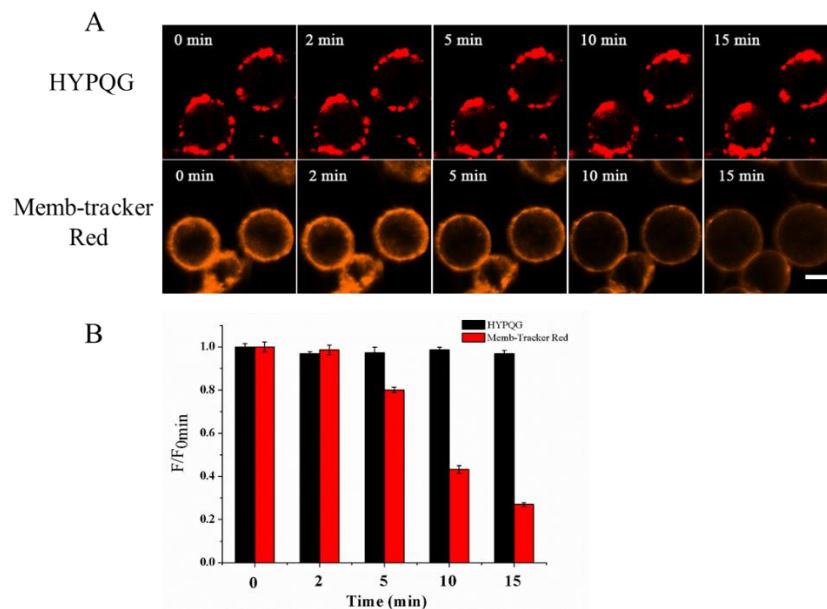

**Fig. S30.** (A) A2780 cells were incubated with HYPQG (5  $\mu$ M) for 40 min and Memb-Tracker Red (5  $\mu$ M) for 10 min, respectively, and then real-time fluorescence scanning was carried out. (B) Average intensity found in Fig. S30A; that of  $t = 0$  min was defined as 1.0. HYPQG:  $\lambda_{ex} = 488$  nm,  $\lambda_{em} = 584$ -676 nm; Memb-Tracker Red:  $\lambda_{ex} = 560$  nm,  $\lambda_{em} = 570$ -620 nm. Scale bar = 20  $\mu$ m

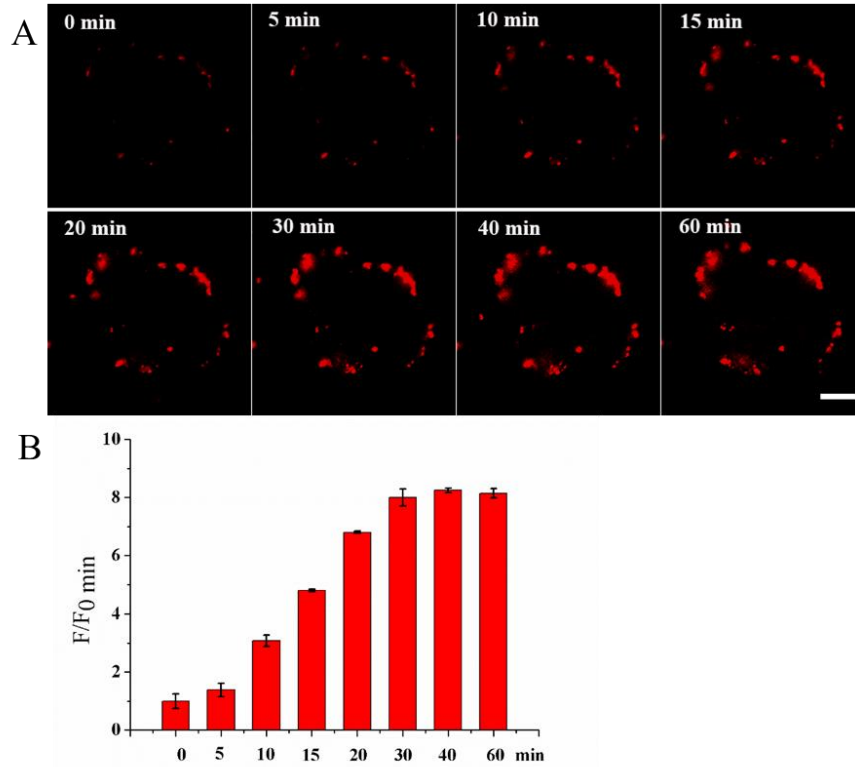

**Fig. S31.** Real-time imaging of A2780 cells incubated with HYPQG (5  $\mu$ M) in DPBS buffer in 5 min intervals. (A) Fluorescence micrographs covering a total of 60 min incubation time. (B) Average intensity found in Fig. S31A; that of  $t=0$  min was defined as 1.0.  $\lambda_{ex} = 488$  nm,  $\lambda_{em} = 584-676$  nm. Scale bar = 20  $\mu$ m

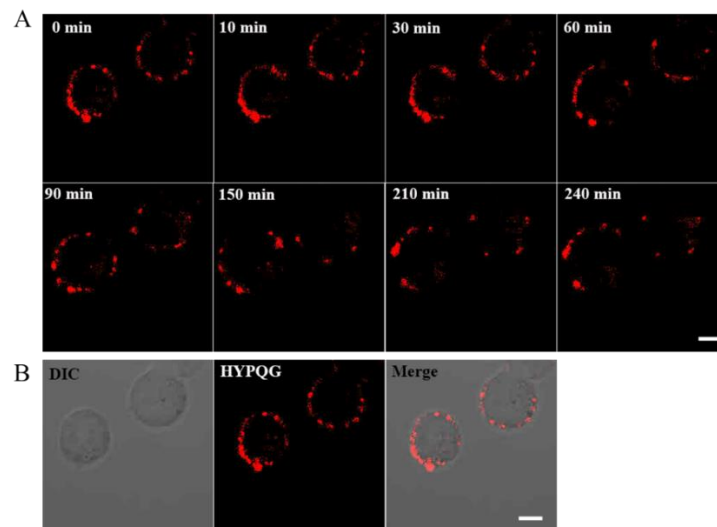

**Fig. S32.** (A) Long-term imaging of endogenous GGT in live A2780 cells. (B) Bright and overlap field.

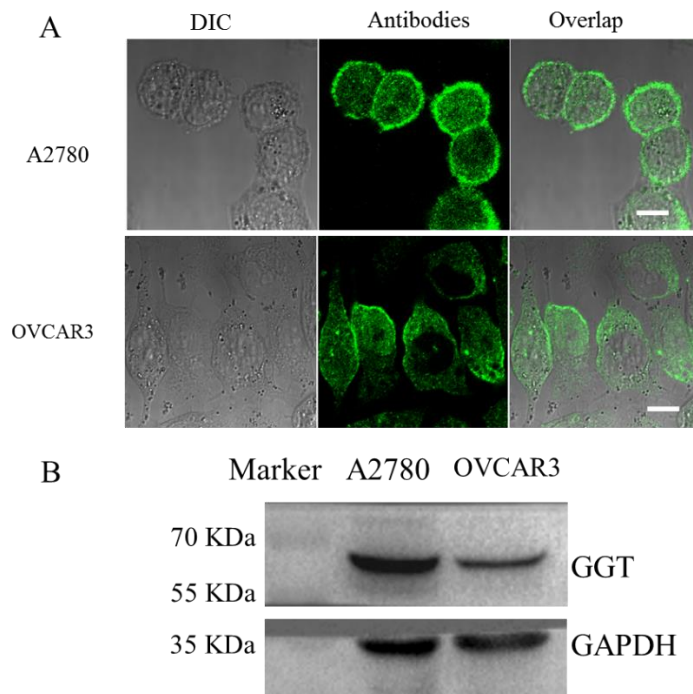

**Fig. S33.** (A) Immunofluorescence analysis with an anti-GGT antibody and a secondary fluorescent antibody in A2780 cells and OVCAR3 cells. The green channel (500-550 nm) shows the fluorescence signal of secondary antibodies excited at 488 nm. (C) Western blot analysis with antibodies against GGT. Results indicated that the GGT expression level in A2780 was higher than that of OVCAR3 cells. Scale bar = 20  $\mu$ m

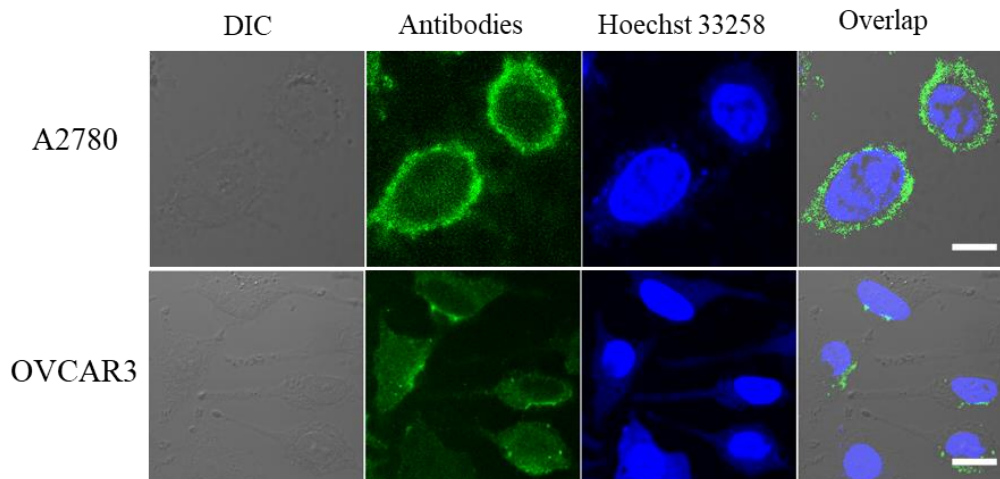

**Fig. S34.** Immunofluorescence and colocalization analysis in A2780 and OVCAR3 cells with antibodies and nucleus trackers. Nuclei staining: DAPI,  $\lambda_{ex}$  = 405 nm,  $\lambda_{em}$  = 425-475 nm; antibodies:  $\lambda_{ex}$  = 488 nm,  $\lambda_{em}$  = 500-550 nm. Scale bar = 20  $\mu$ m

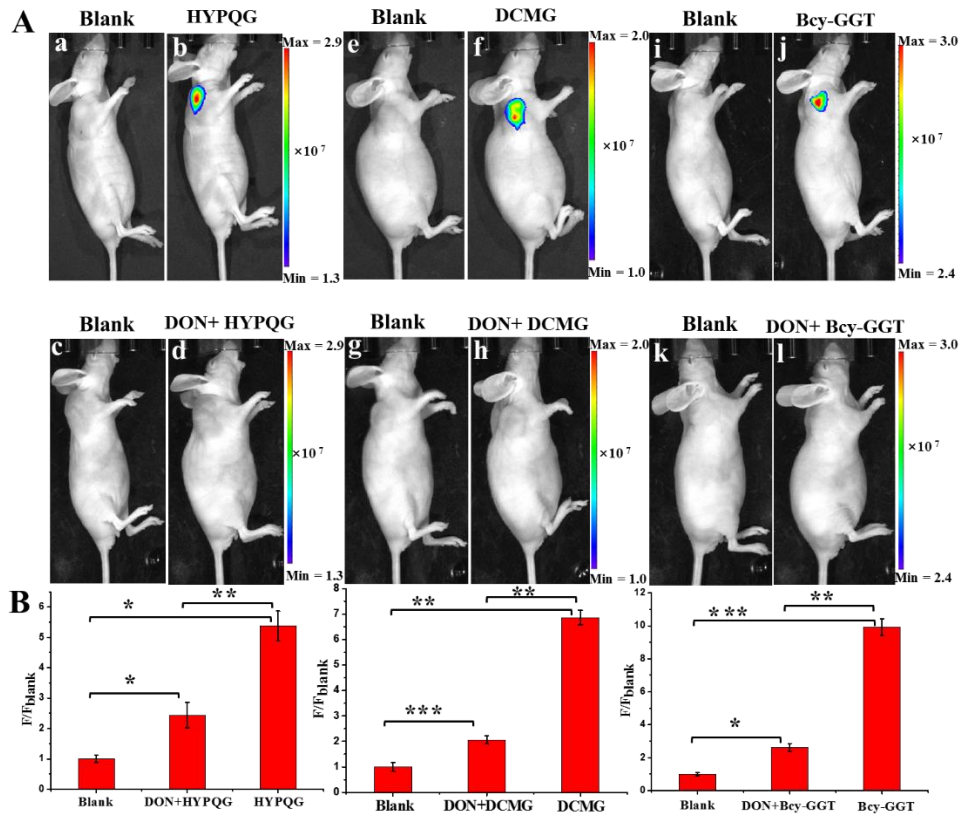

**Fig. S35.** (A) In vivo fluorescence imaging of endogenous GGT in A2780 cells tumor-bearing mice after intratumoral injection of 20  $\mu$ M HYPQG (b), DCMG (f) and Bcy-GGT (j) for 60 min respectively, or pretreated with DON (5 mM) for 1 h before incubation with HYPQG (d), DCMG (h) and Bcy-GGT (l) for 60 min. (B) Average fluorescence intensity found in Fig. S35A; blank intensity was defined as 1.0. Statistical significance p-values (\* p < 0.05, \*\* p < 0.01, \*\*\* p < 0.001) were determined using two-sided Student's t-test (n=3).

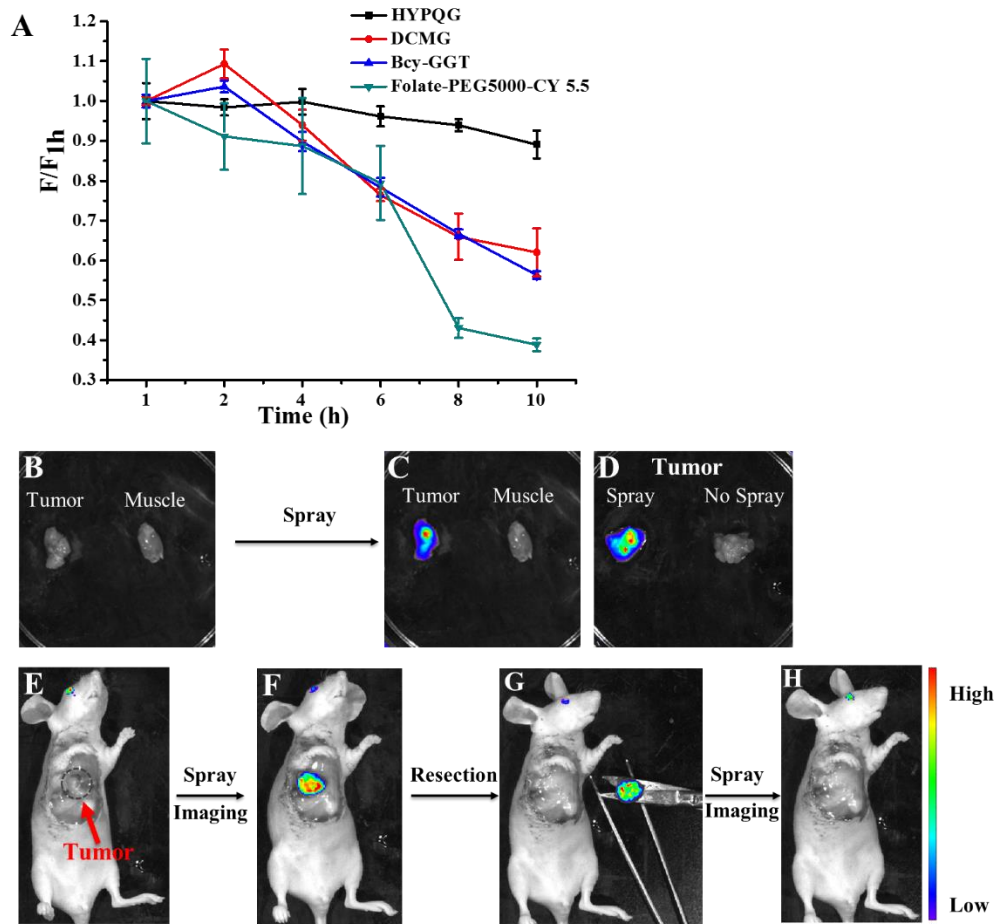

**Fig. S36.** (A) The quantitative analysis of long-term imaging experiments *in vivo*. Average fluorescence intensity found in Fig. 6; the fluorescence intensity of 1 h was defined as 1.0. In vitro imaging of cancer tissue and normal muscle tissue (B and C) through spraying HYPQG. Fluorescence imaging of tumor tissues via spraying or no spraying probe HYPQG (D) Image-guided resection by spraying probe HYPQG in nude mice bearing A2780 xenograft tumor: (E) fluorescence image; (F) spraying HYPQG for 1 hour, then fluorescence image; (G) surgical removal of tumor; (H) respraying HYPQG for 1 hour, then fluorescence image.

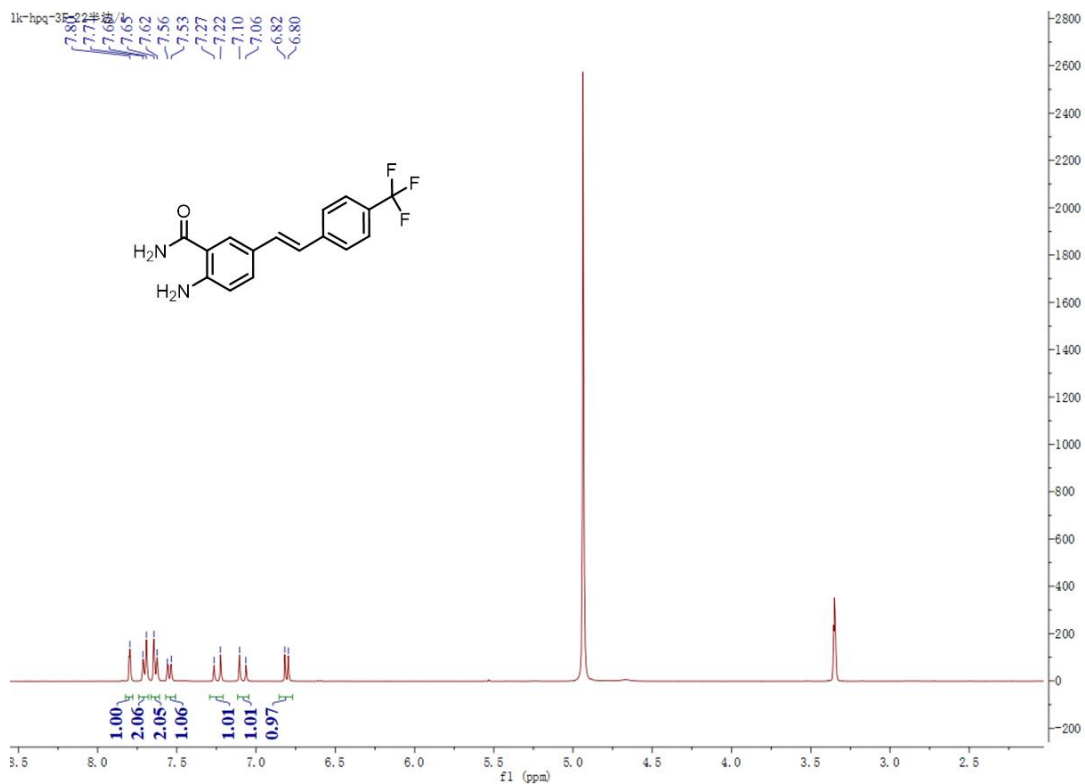

Fig. S37. <sup>1</sup>H NMR spectrum of compound 3.

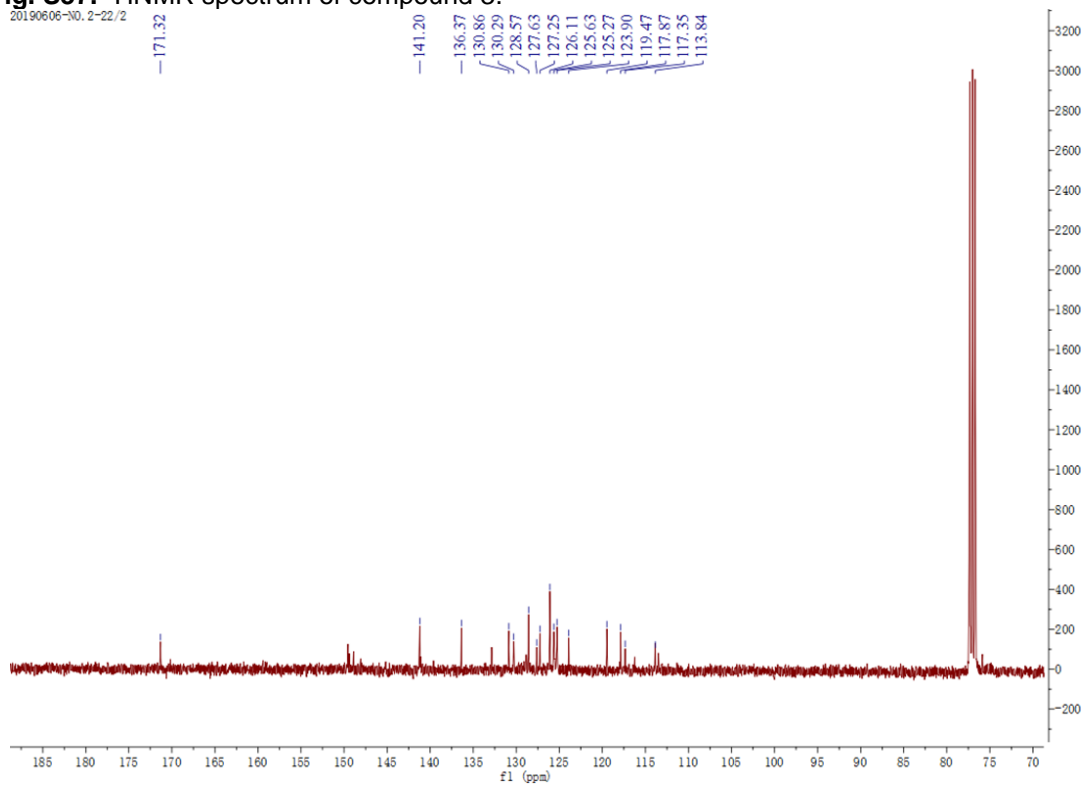

Fig. S38. <sup>13</sup>C NMR spectrum of compound 3.

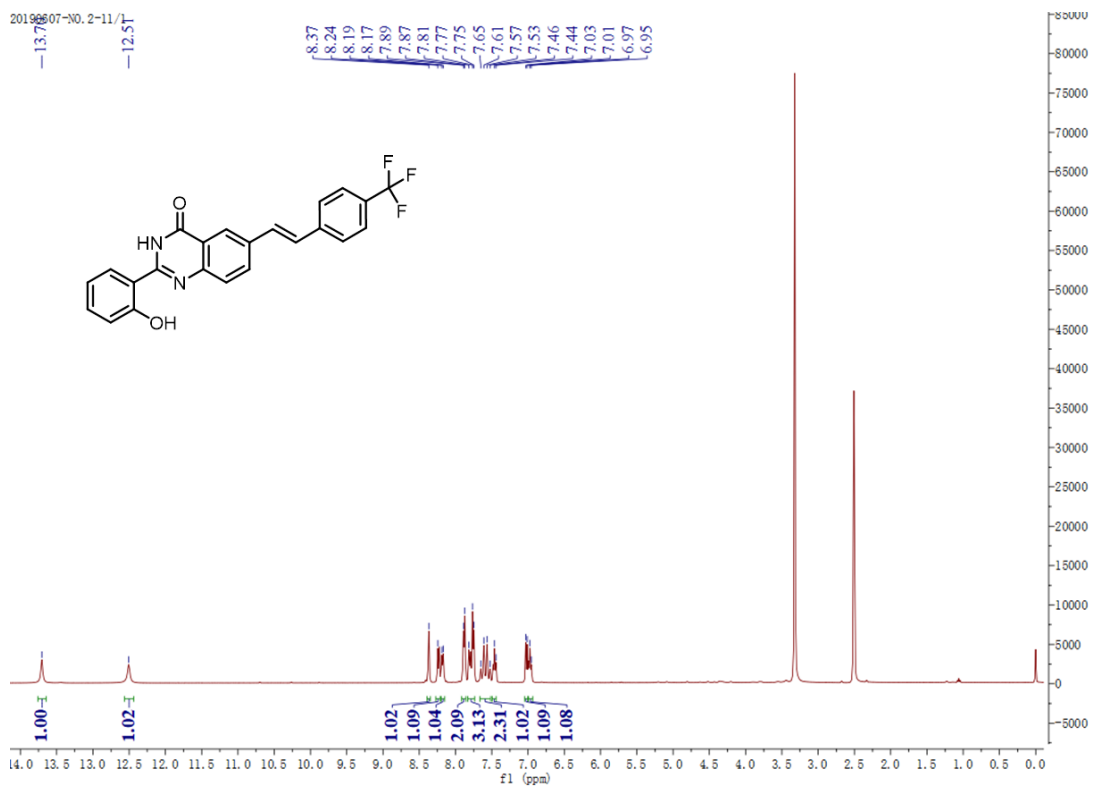

Fig. S39. <sup>1</sup>H NMR spectrum of HPQ1.

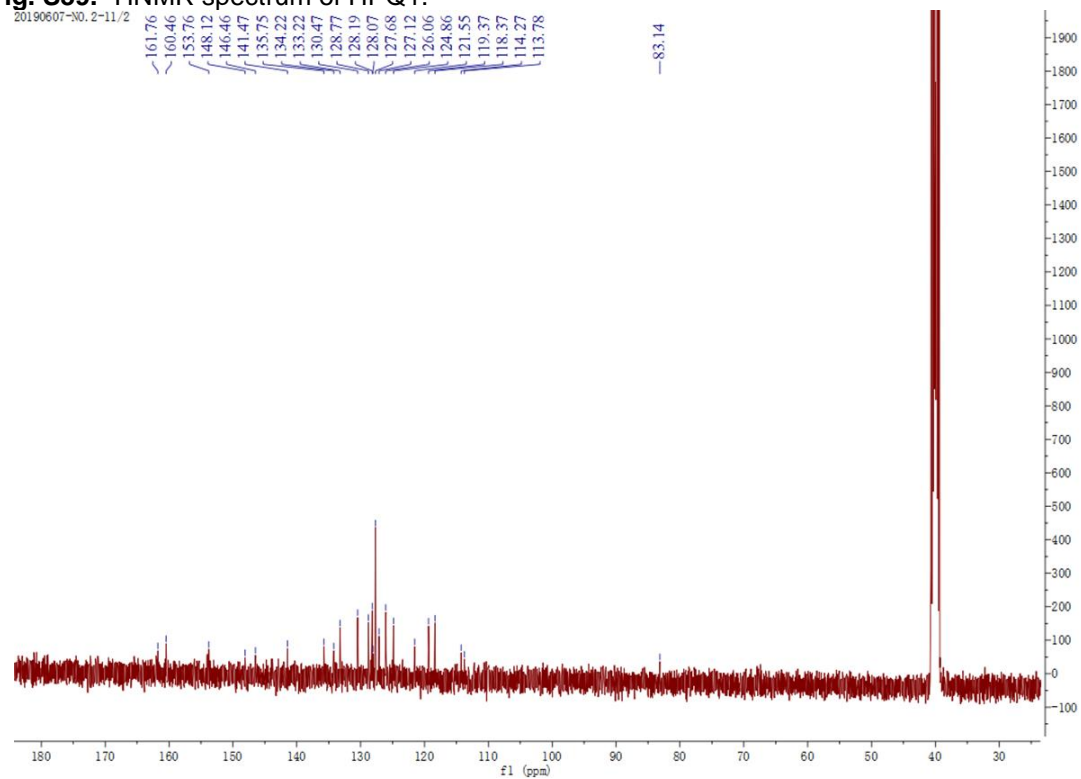

Fig. S40. <sup>13</sup>C NMR spectrum of HPQ1.

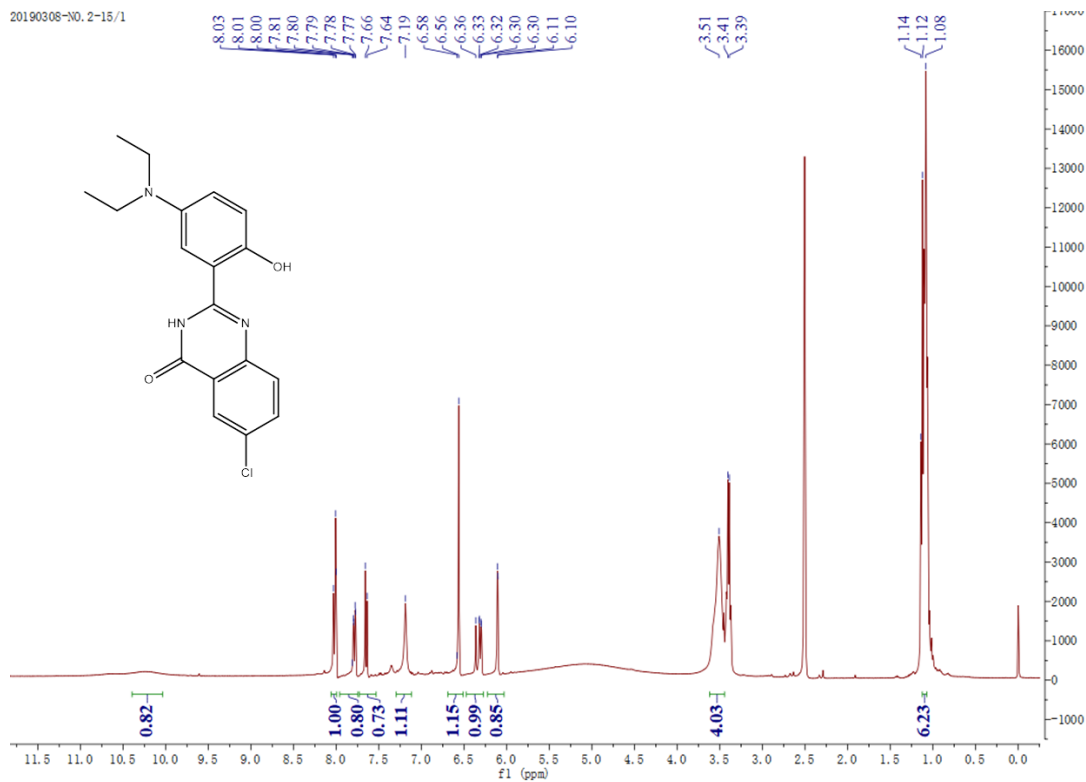

Fig. S41. <sup>1</sup>H NMR spectrum of HPQ2.

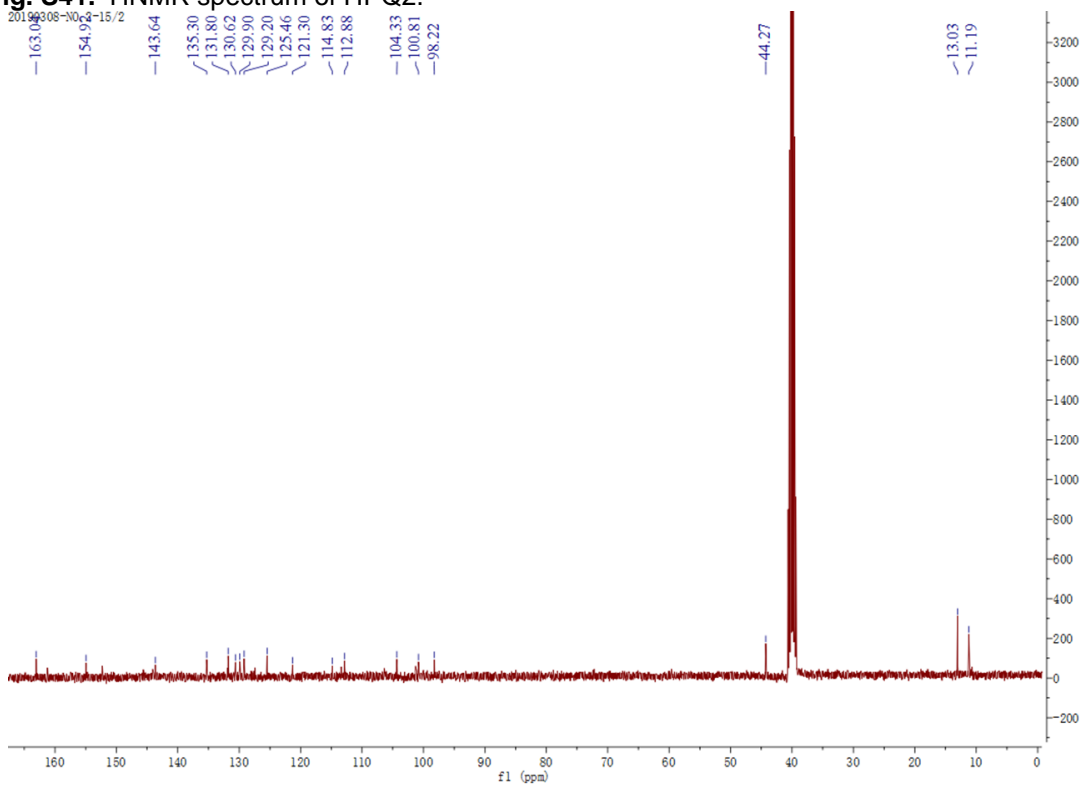

Fig. S42. <sup>13</sup>C NMR spectrum of HPQ2.



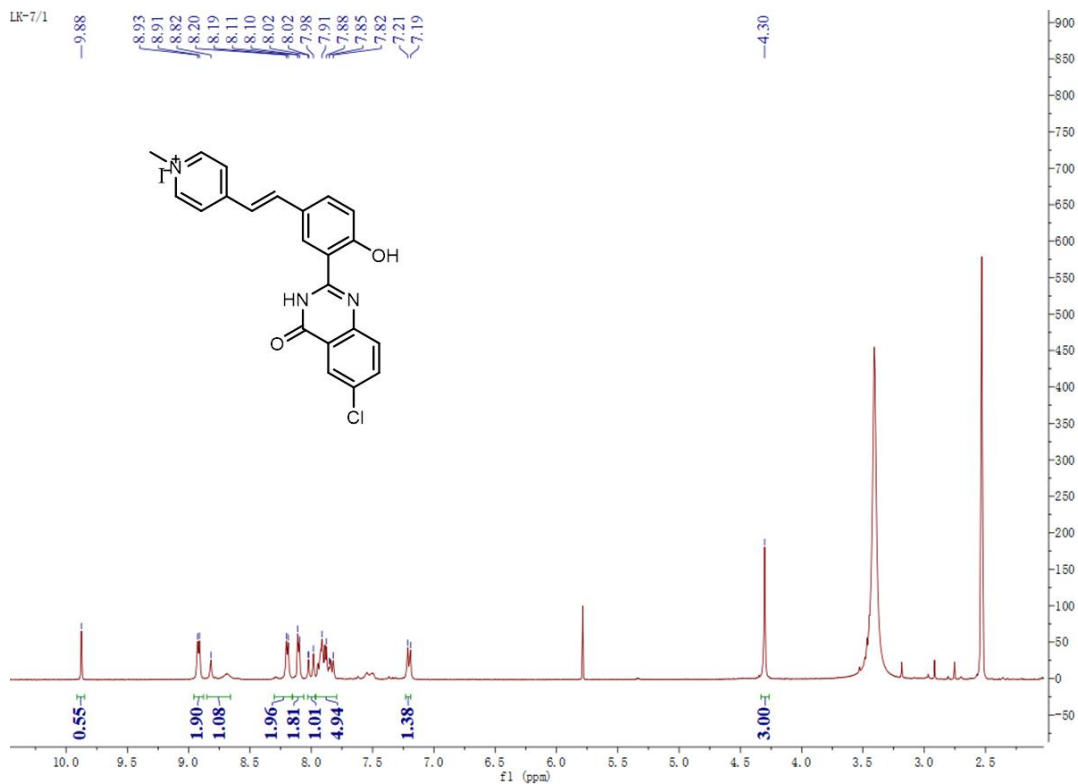

Fig. S43.  $^1\text{H NMR}$  spectrum of HPQ3.

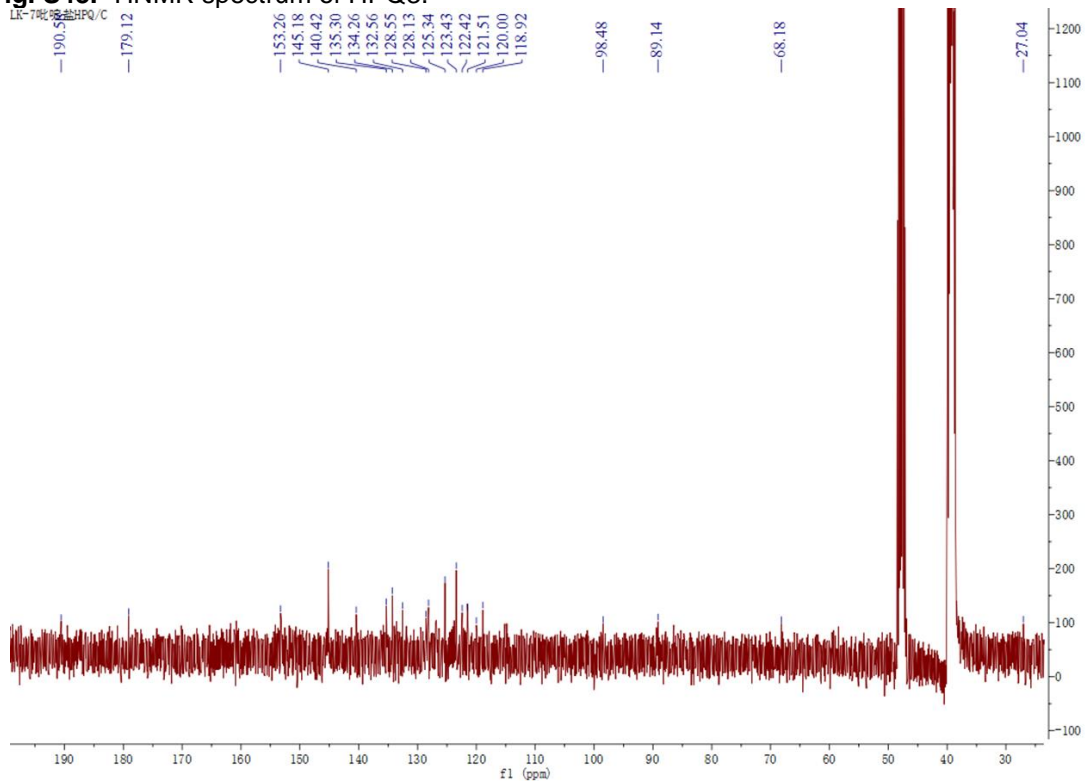

Fig. S44.  $^{13}\text{C NMR}$  spectrum of HPQ3.

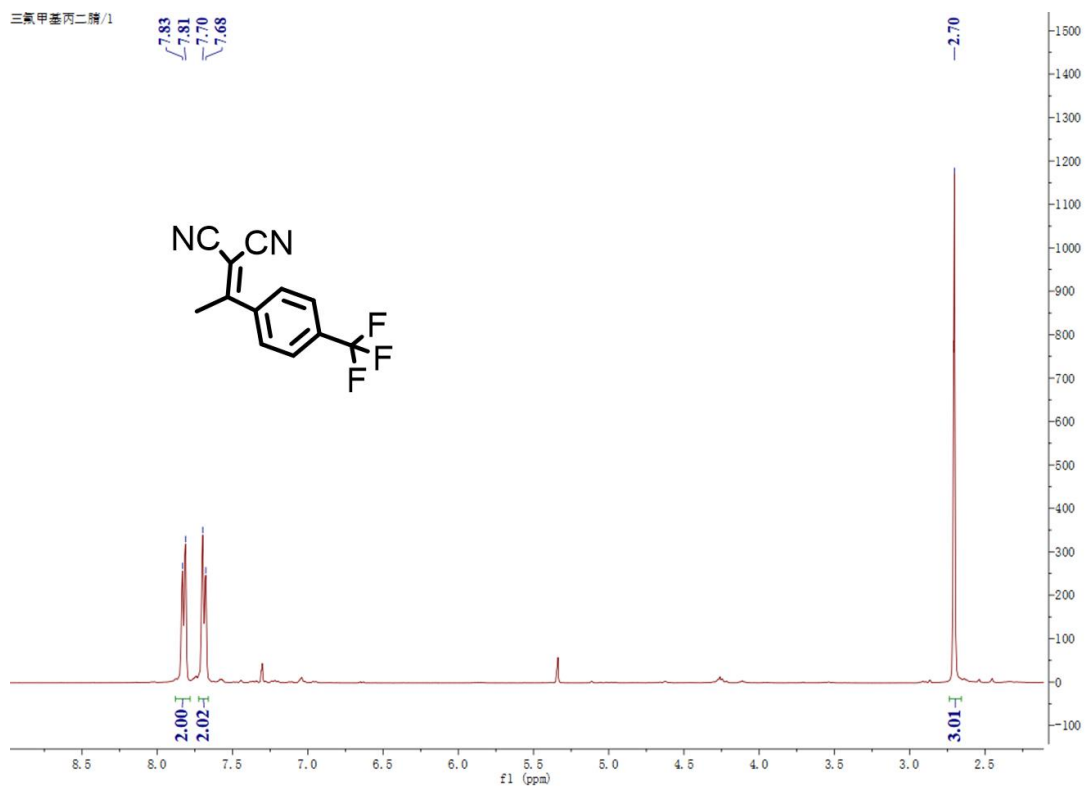

Fig. S45. <sup>1</sup>H NMR spectrum of compound 7.

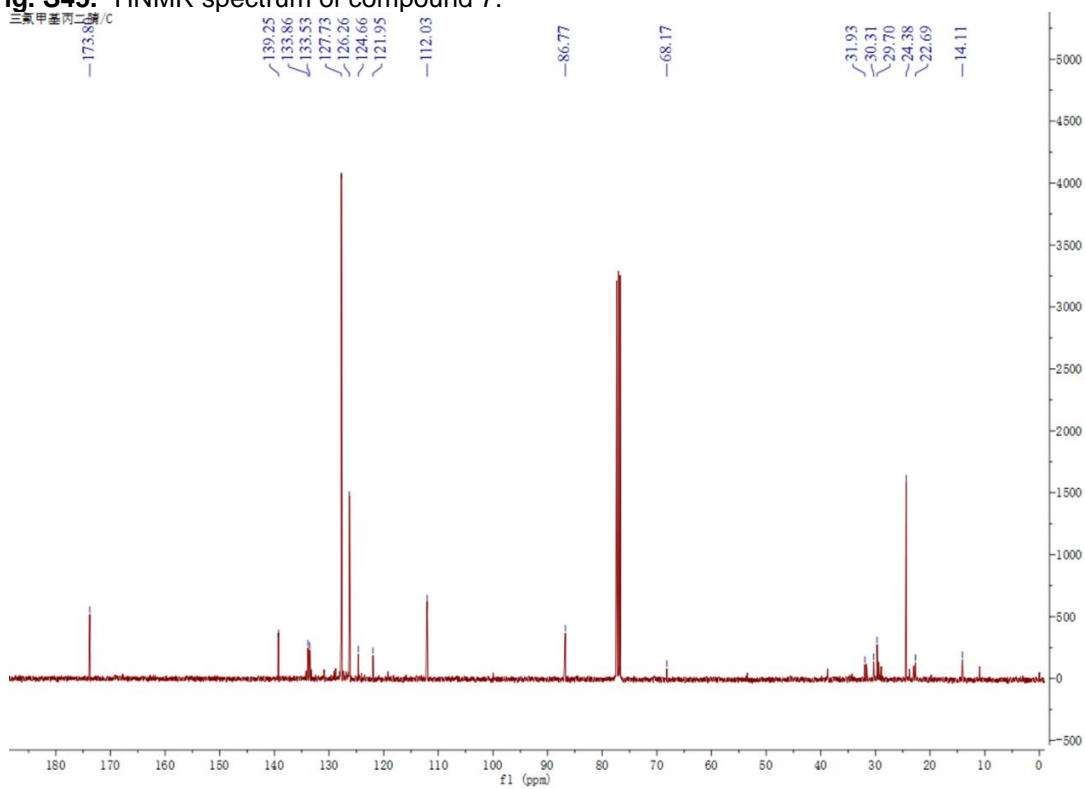

Fig. S46. <sup>13</sup>C NMR spectrum of compound 7.

20190629-NO. 2-1/1

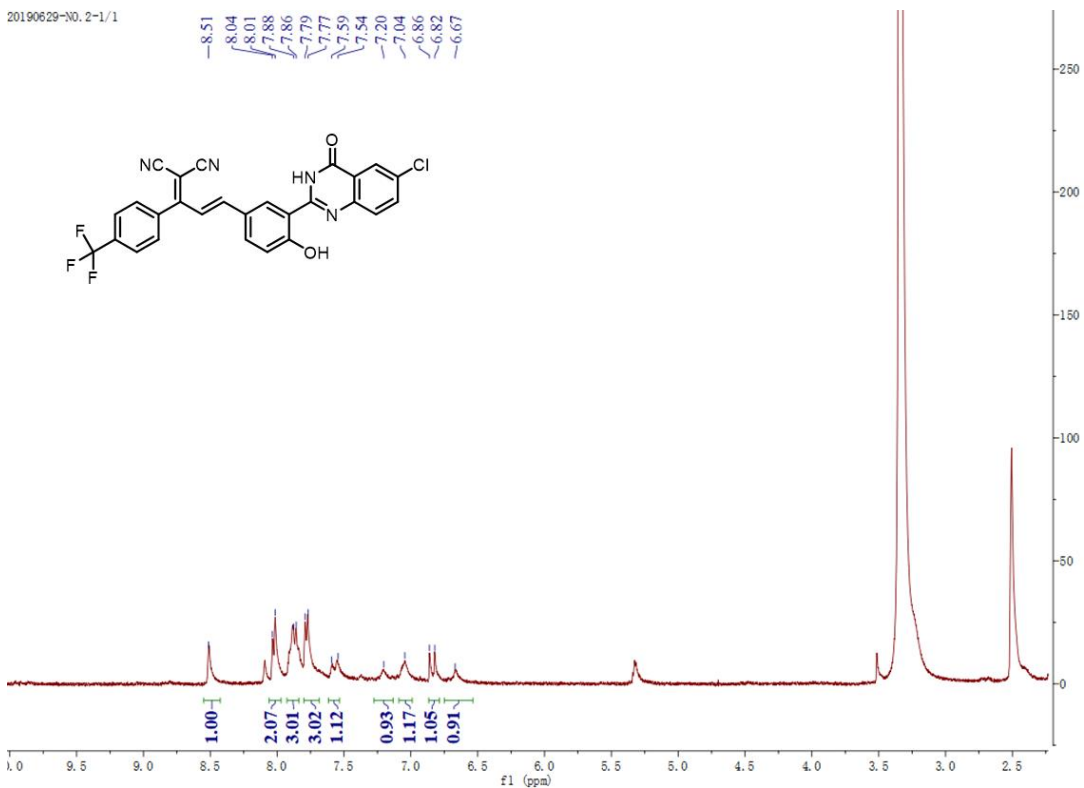

Fig. S47. <sup>1</sup>H NMR spectrum of HPQ4.

20190701-NO. 2-2/1

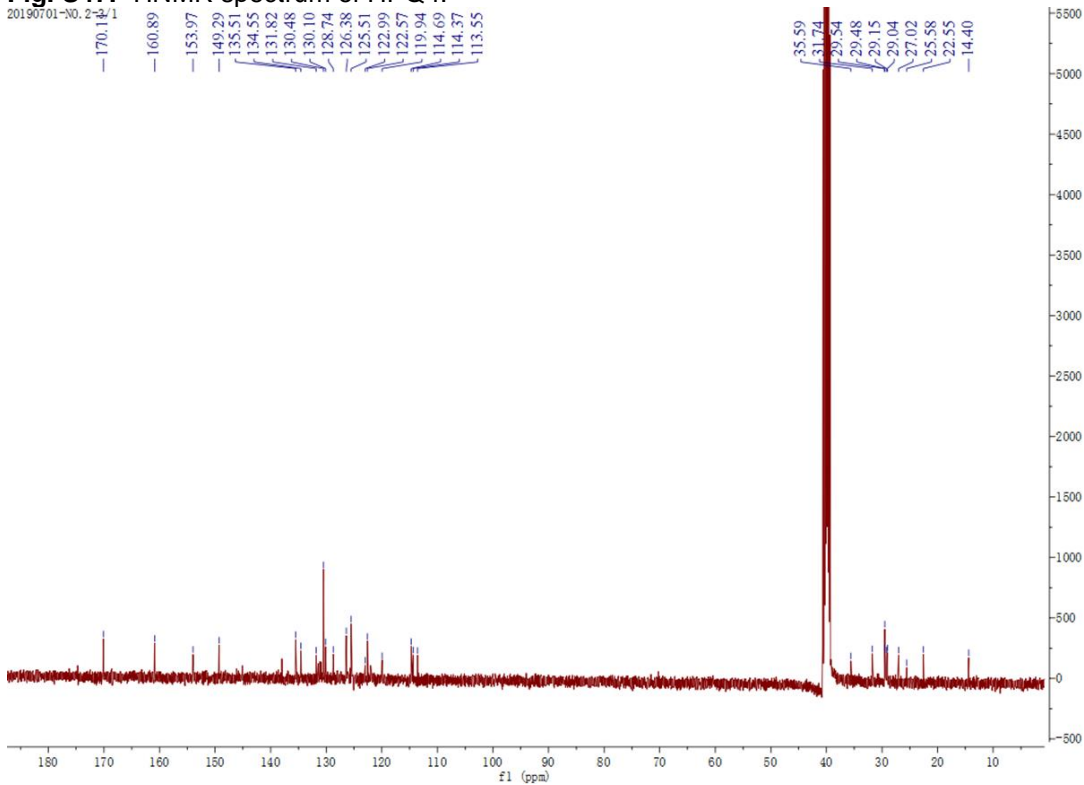

Fig. S48. <sup>13</sup>C NMR spectrum of HPQ4.

20190606-N0.2-23/1

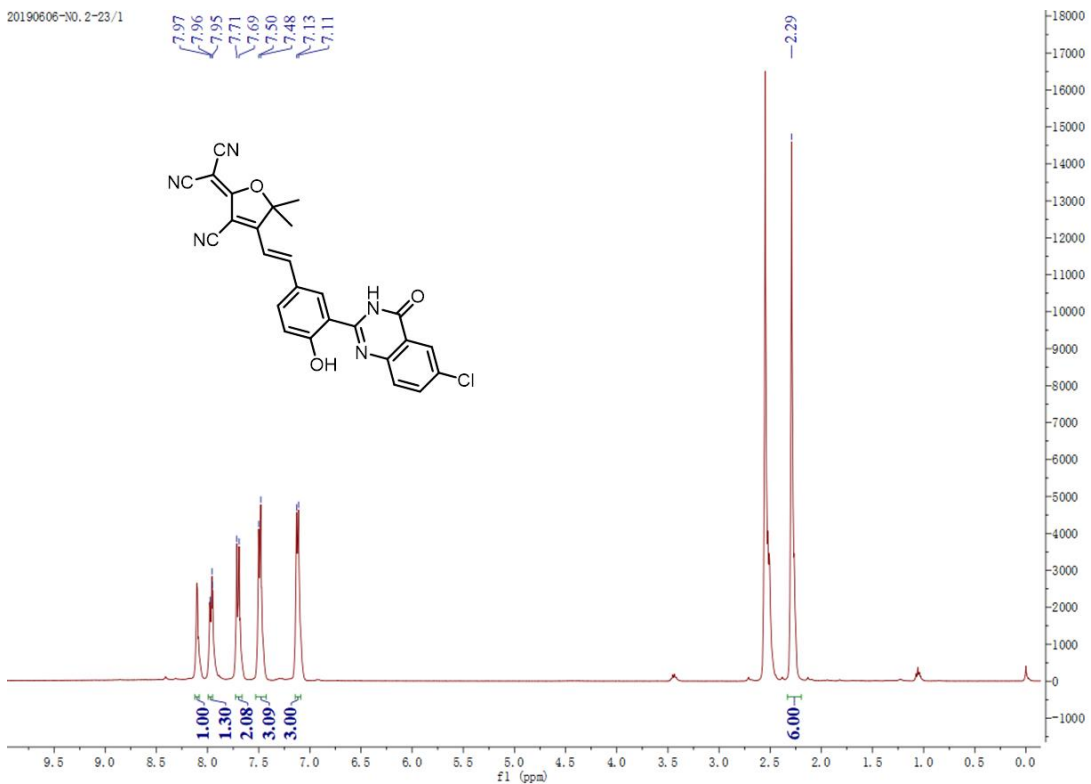

Fig. S49.  $^1\text{H NMR}$  spectrum of HPQ5.

20190606-N0.2-23/2

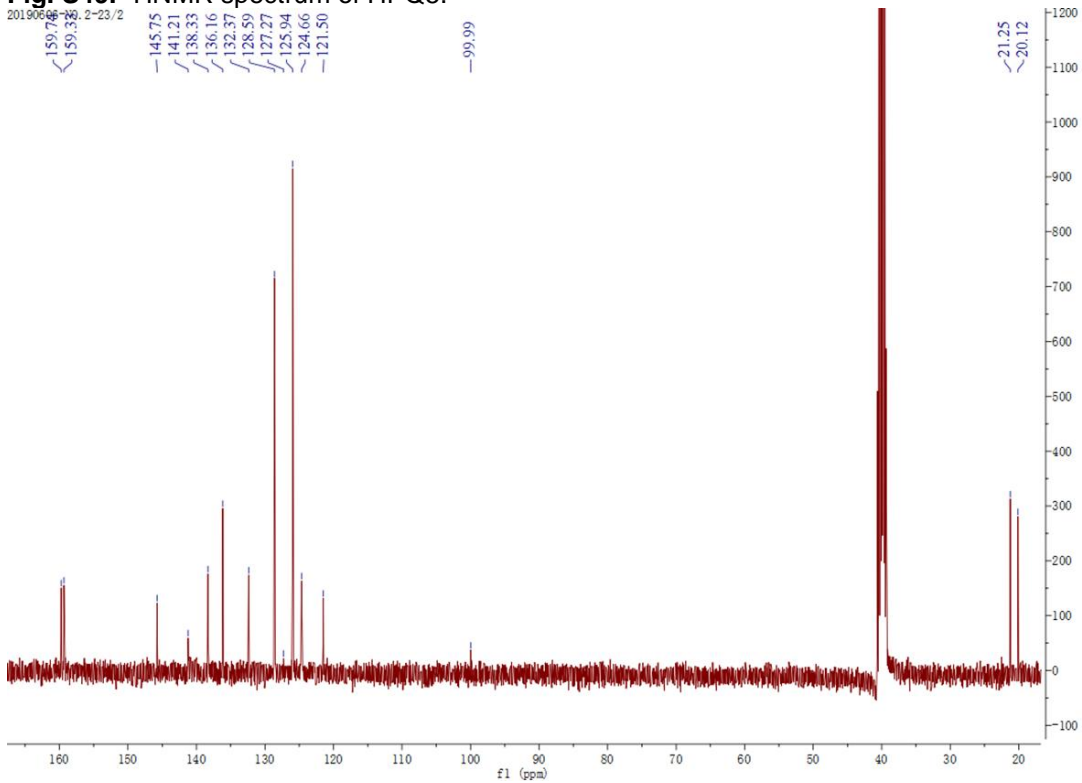

Fig. S50.  $^{13}\text{C NMR}$  spectrum of HPQ5.

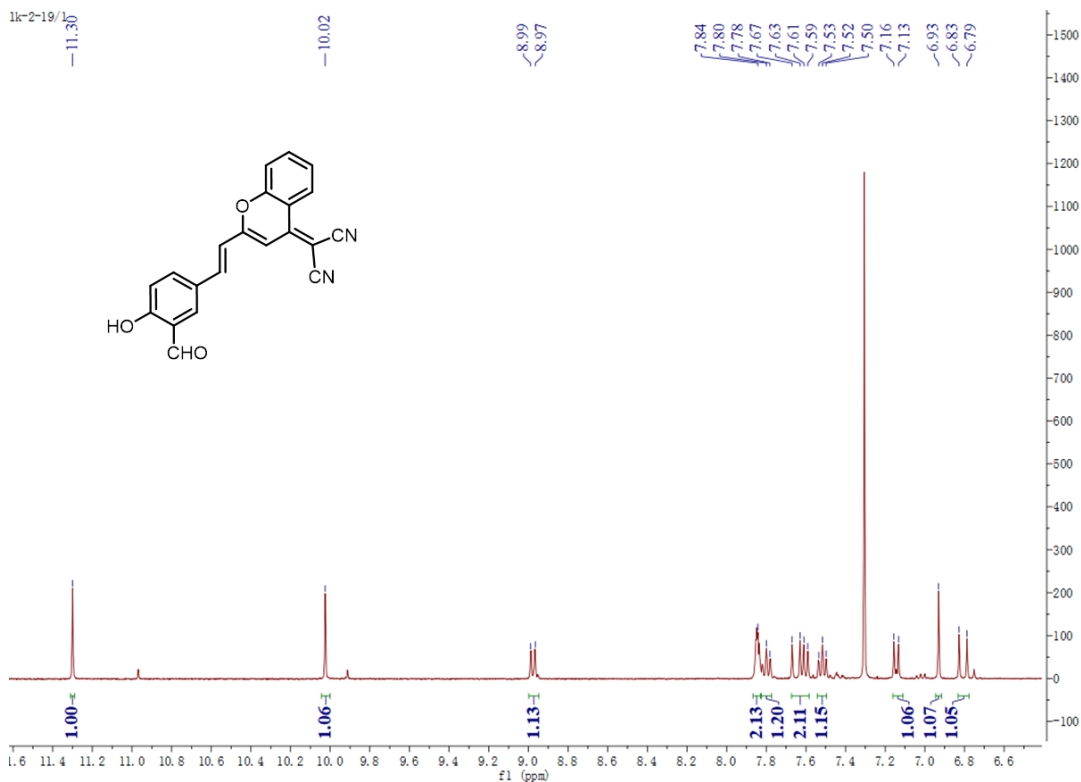

Fig. S51. <sup>1</sup>H NMR spectrum of compound 9.

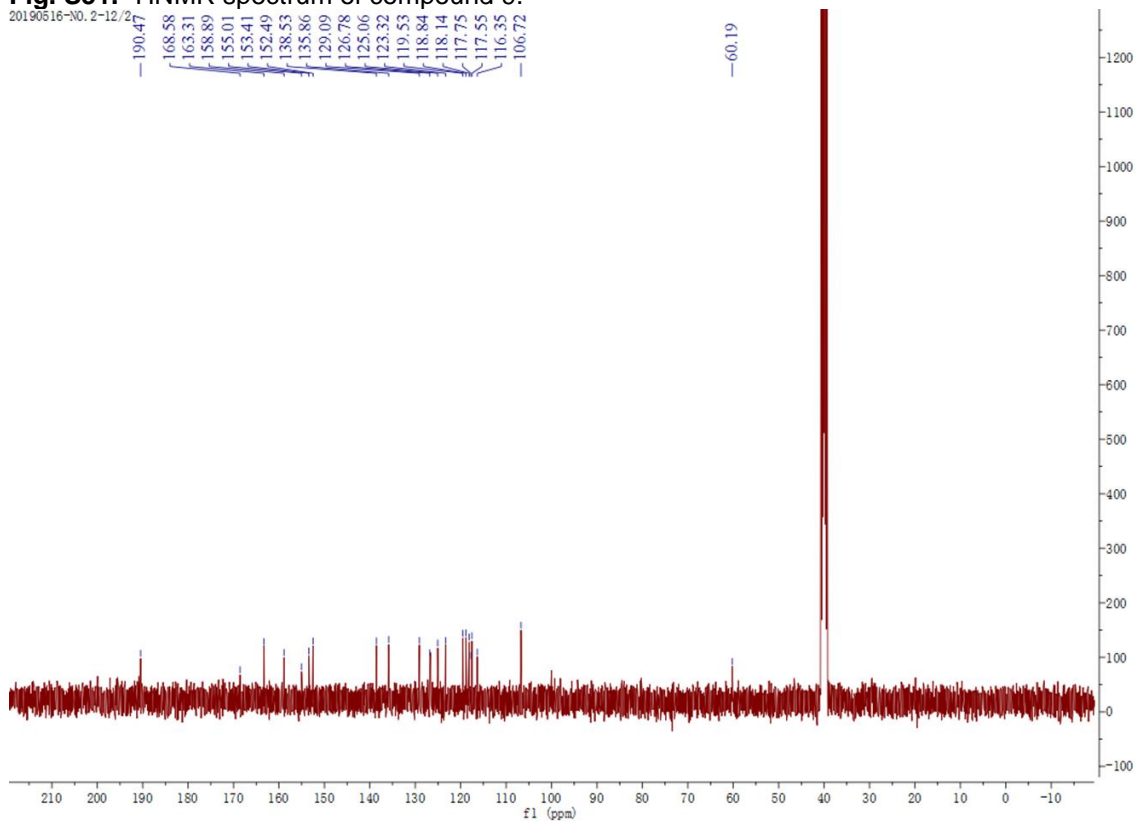

Fig. S52. <sup>13</sup>C NMR spectrum of compound 9.

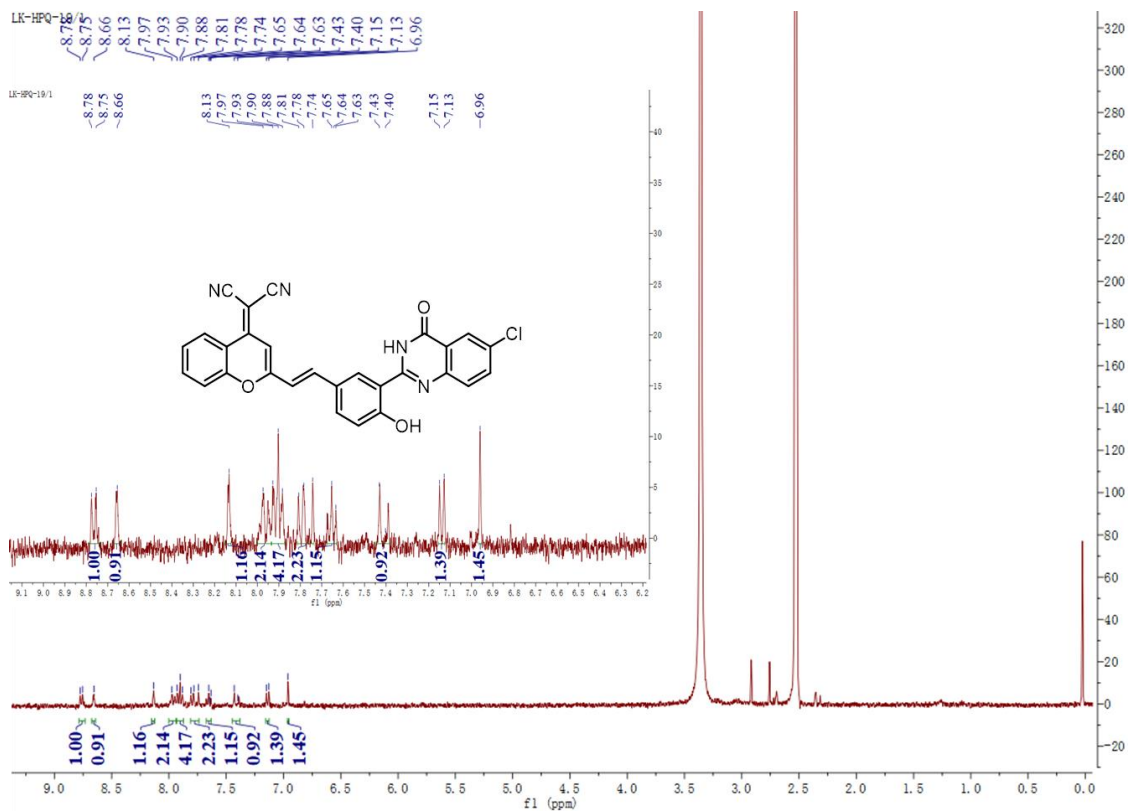

Fig. S53. <sup>1</sup>H NMR spectrum of HYPQ.

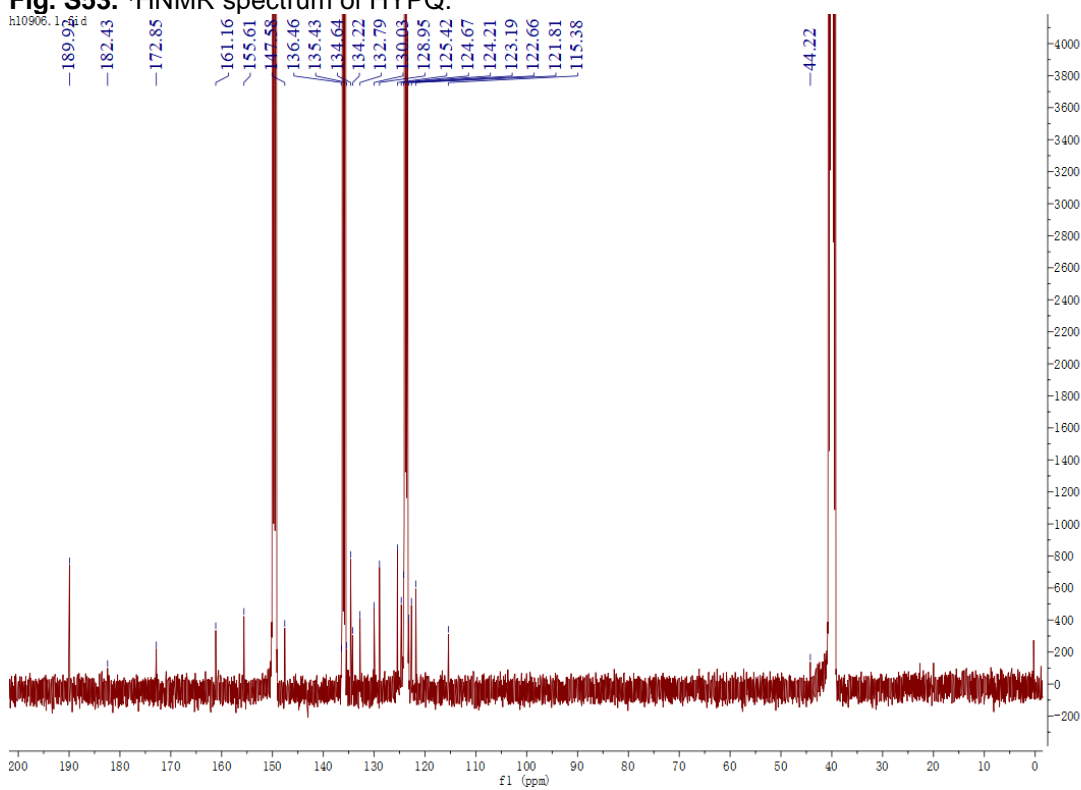

Fig. S54. <sup>13</sup>C NMR spectrum of HYPQ.

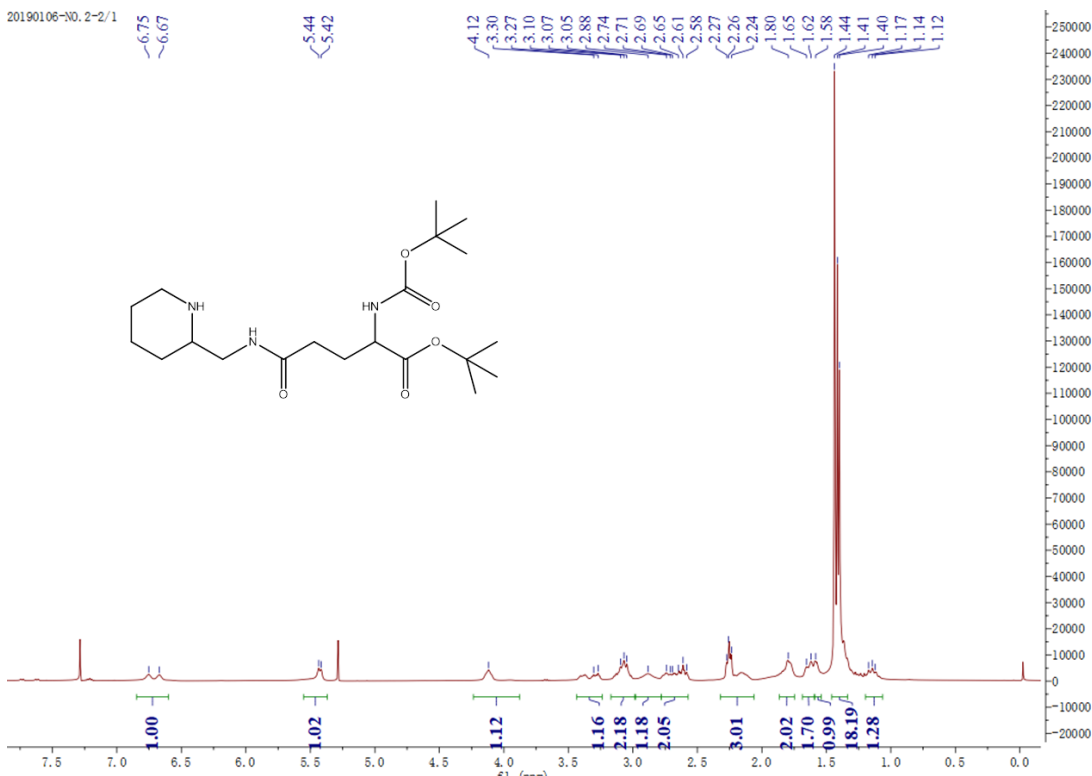

Fig. S55. <sup>1</sup>H NMR spectrum of compound 11.

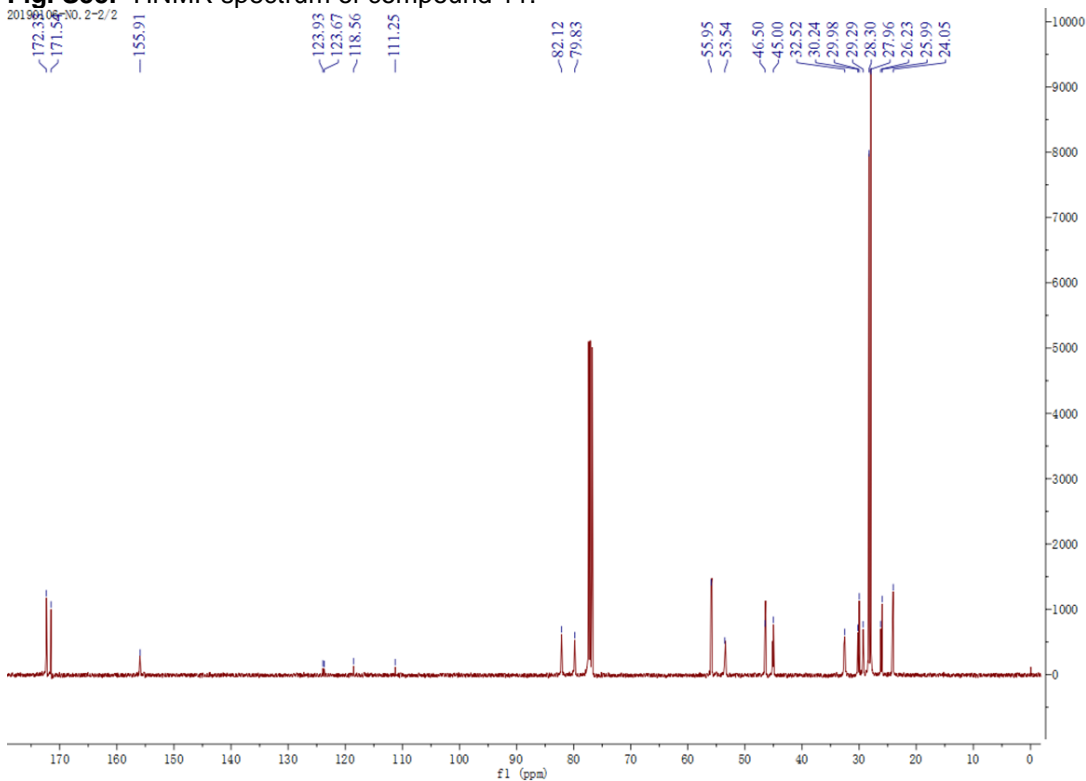

Fig. S56. <sup>13</sup>C NMR spectrum of compound 11.

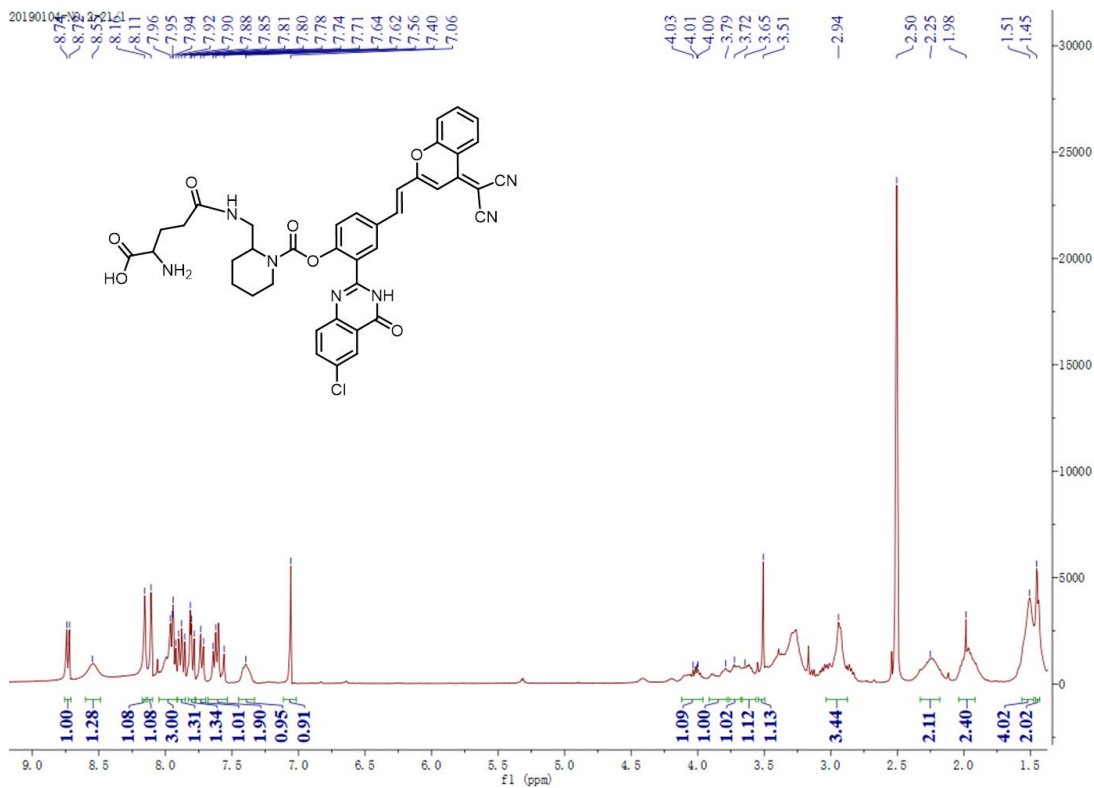

**Fig. S57.**  $^1\text{H}$ NMR spectrum of HYPQG.

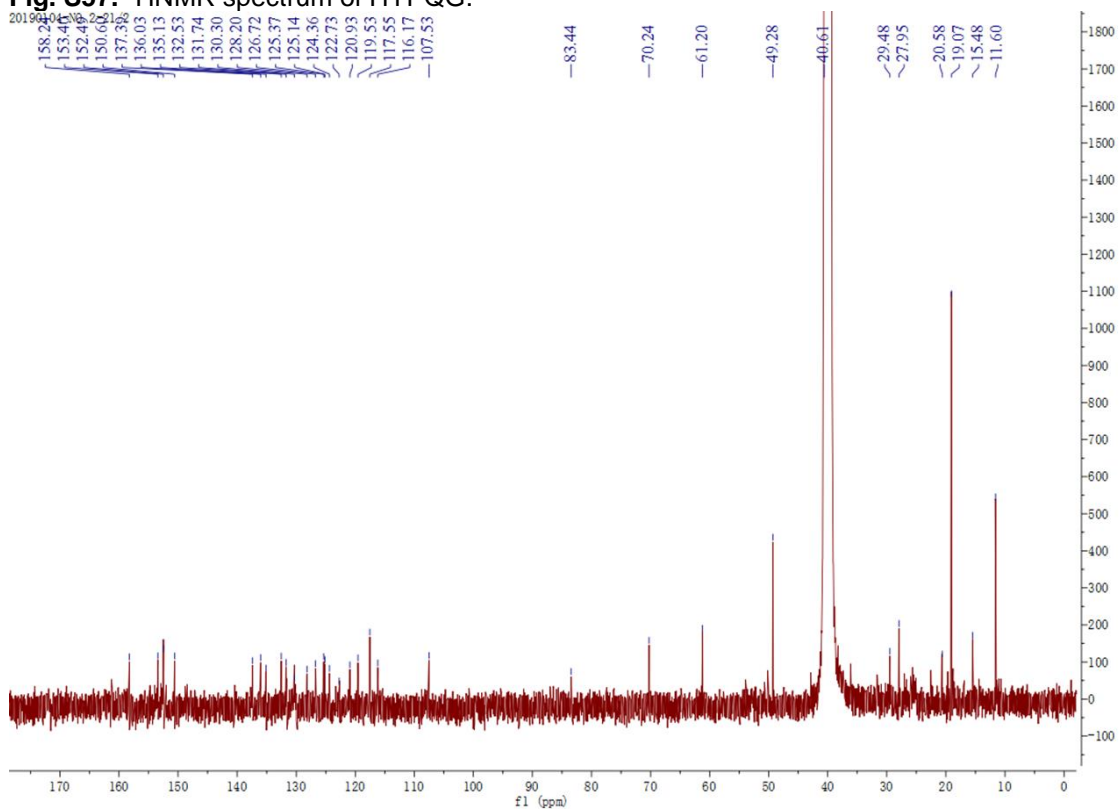

**Fig. S58.**  $^{13}\text{C}$ NMR spectrum of HYPQG.



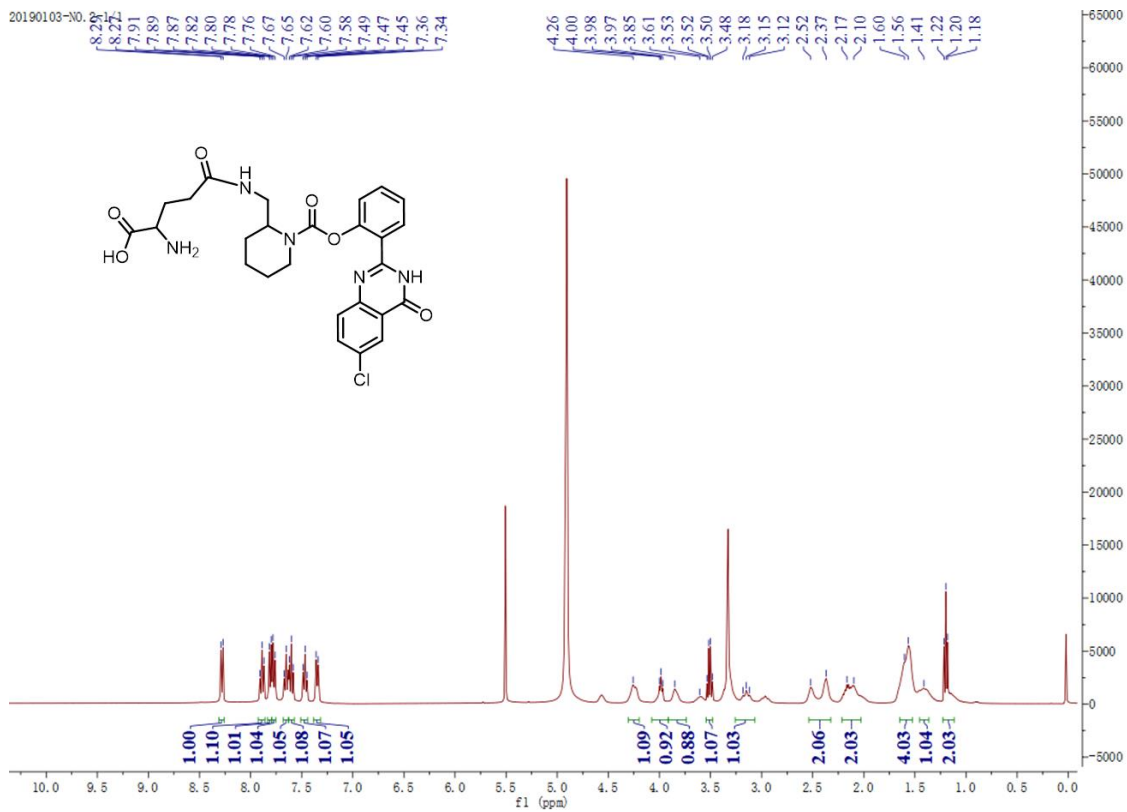

**Fig. S59.**  $^1\text{H}$ NMR spectrum of HPQG.

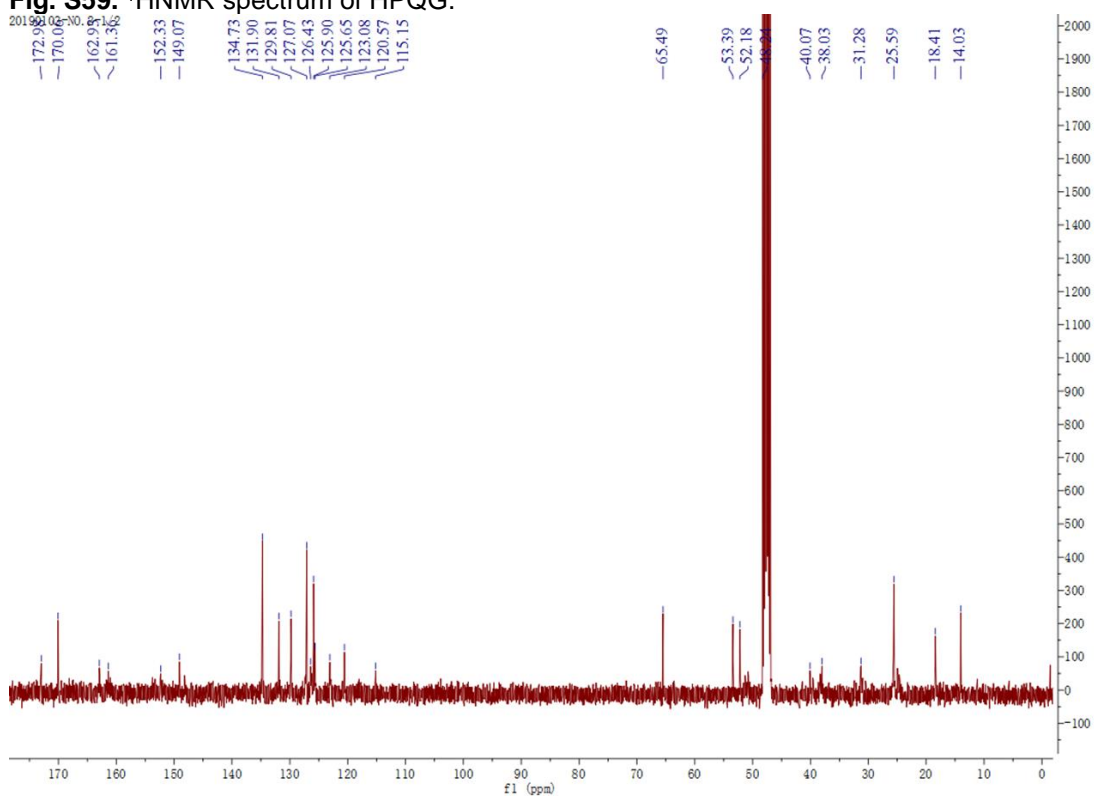

**Fig. S60.**  $^{13}\text{C}$ NMR spectrum of HPQG.

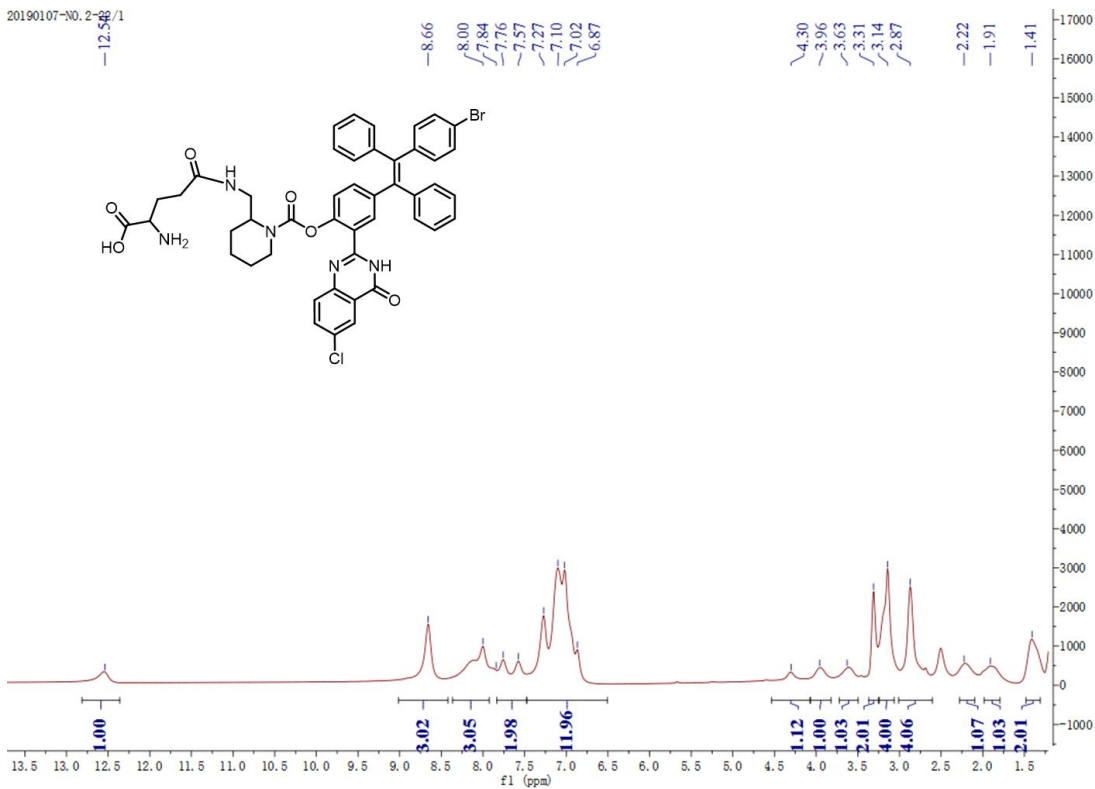

**Fig. S61.**  $^1\text{H}$ NMR spectrum of HTPQG.

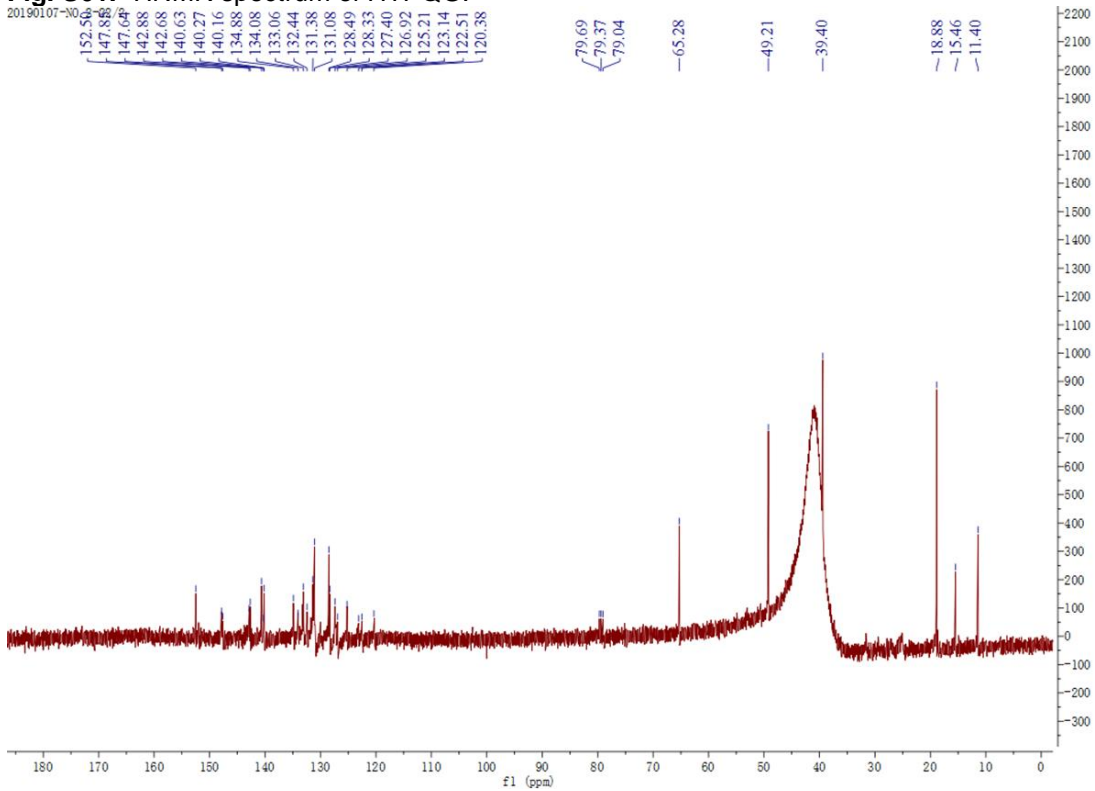

**Fig. S62.**  $^{13}\text{C}$ NMR spectrum of HTPQG.

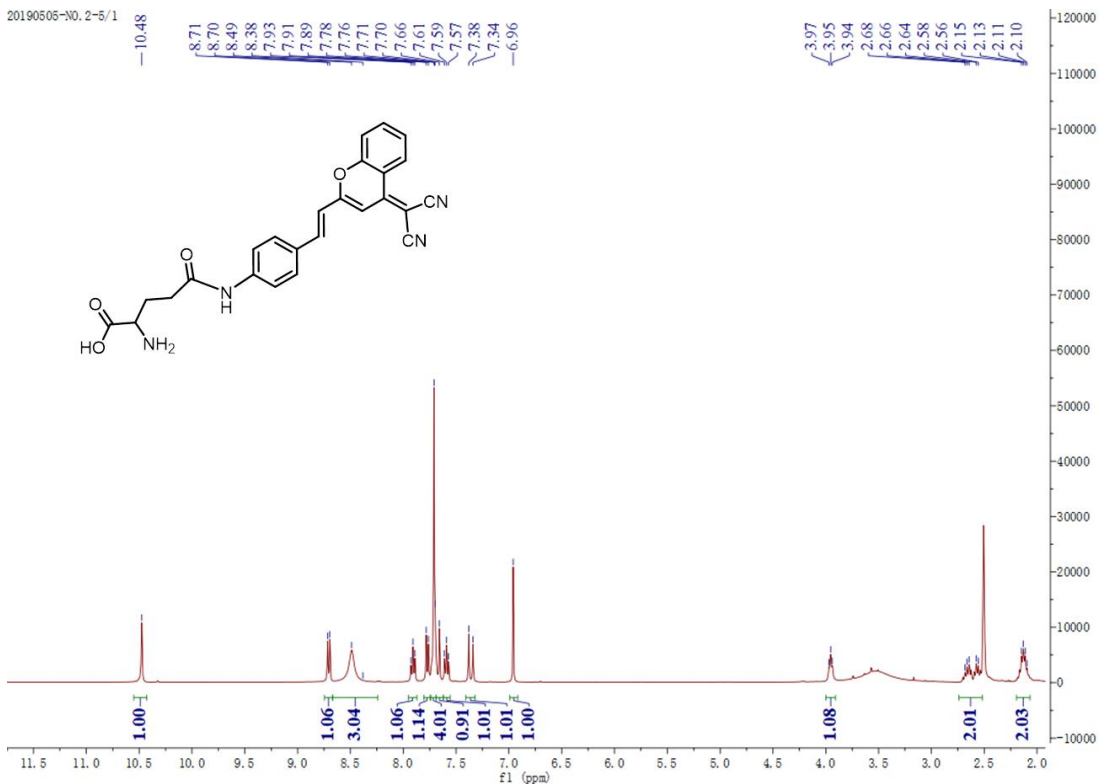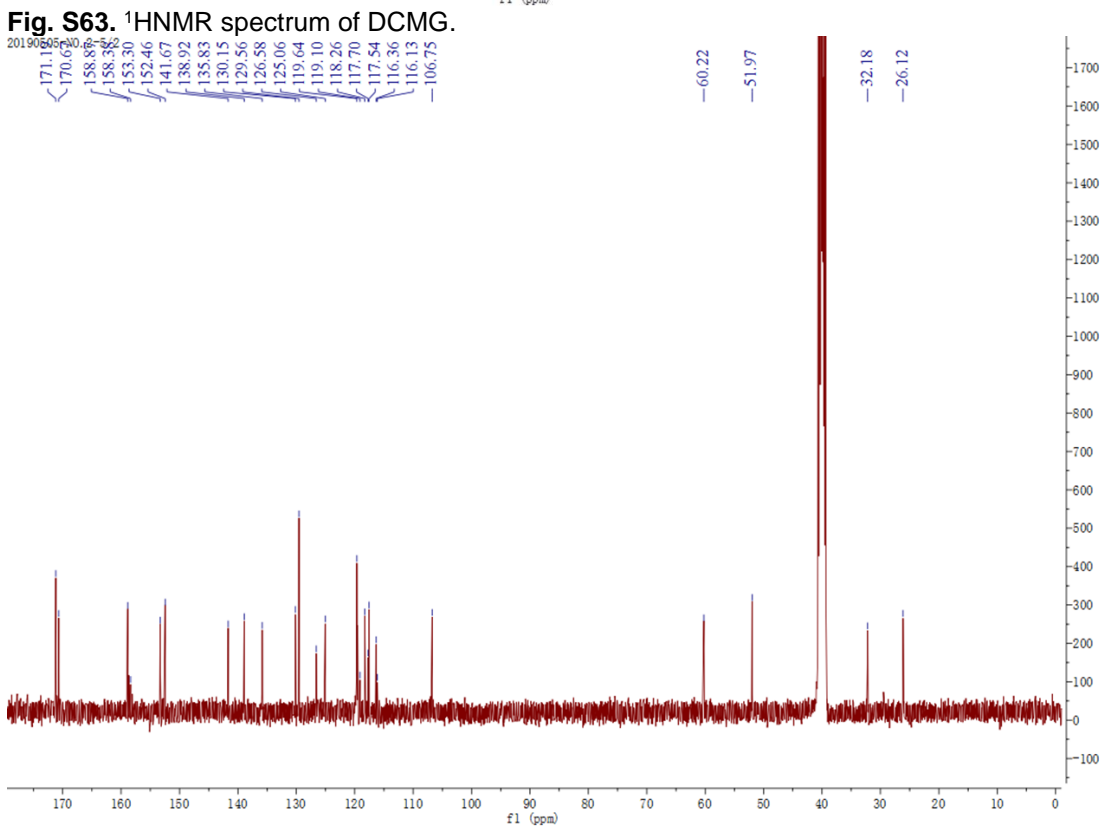

1k-1-13/1

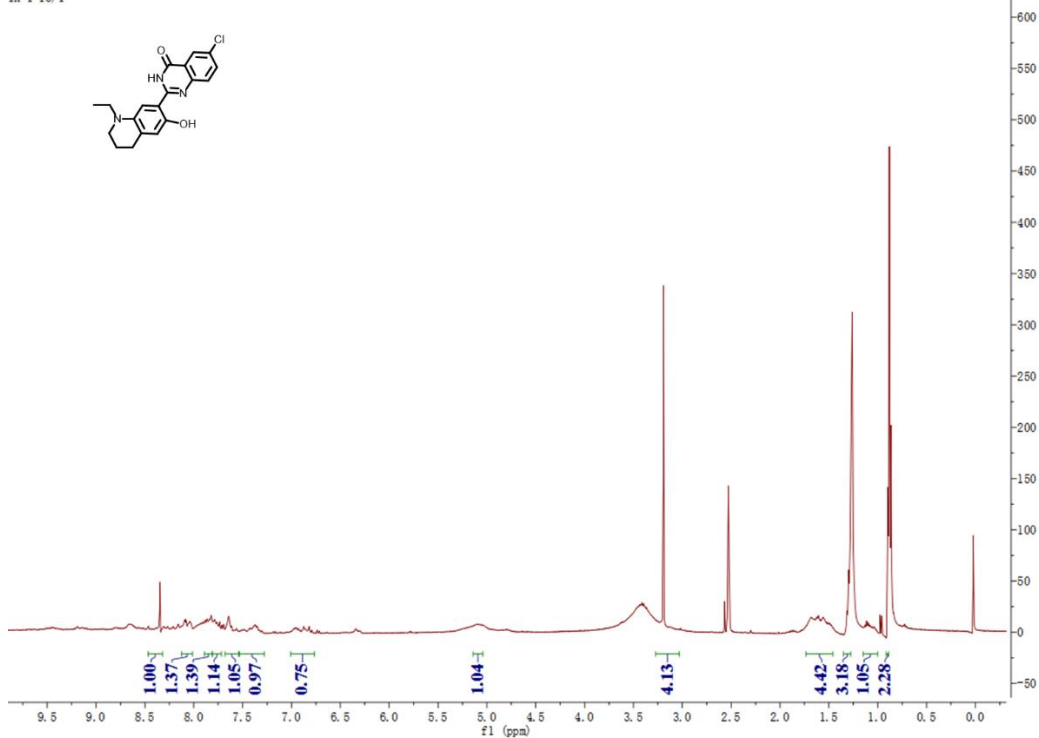

Fig. S65. <sup>1</sup>H NMR spectrum of HPQ-N.

1k1-1/1

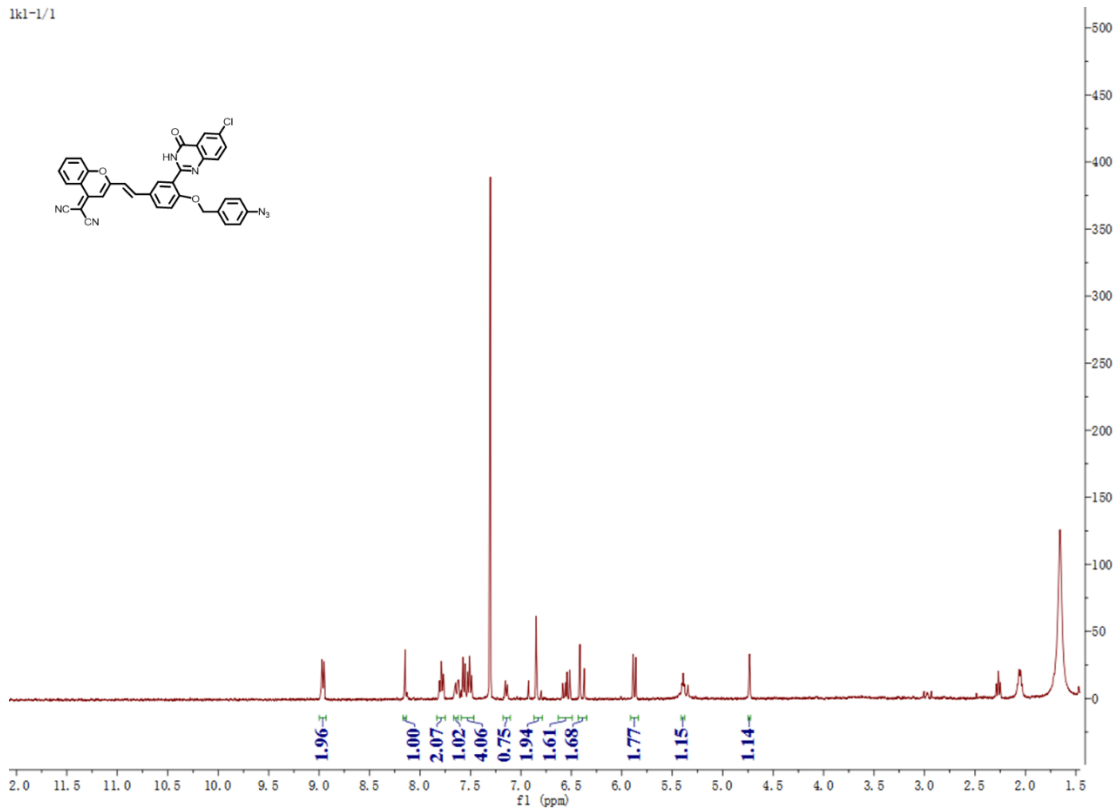

Fig. S66. <sup>1</sup>H NMR spectrum of HYPQ-photoactivatable.

光谱/1

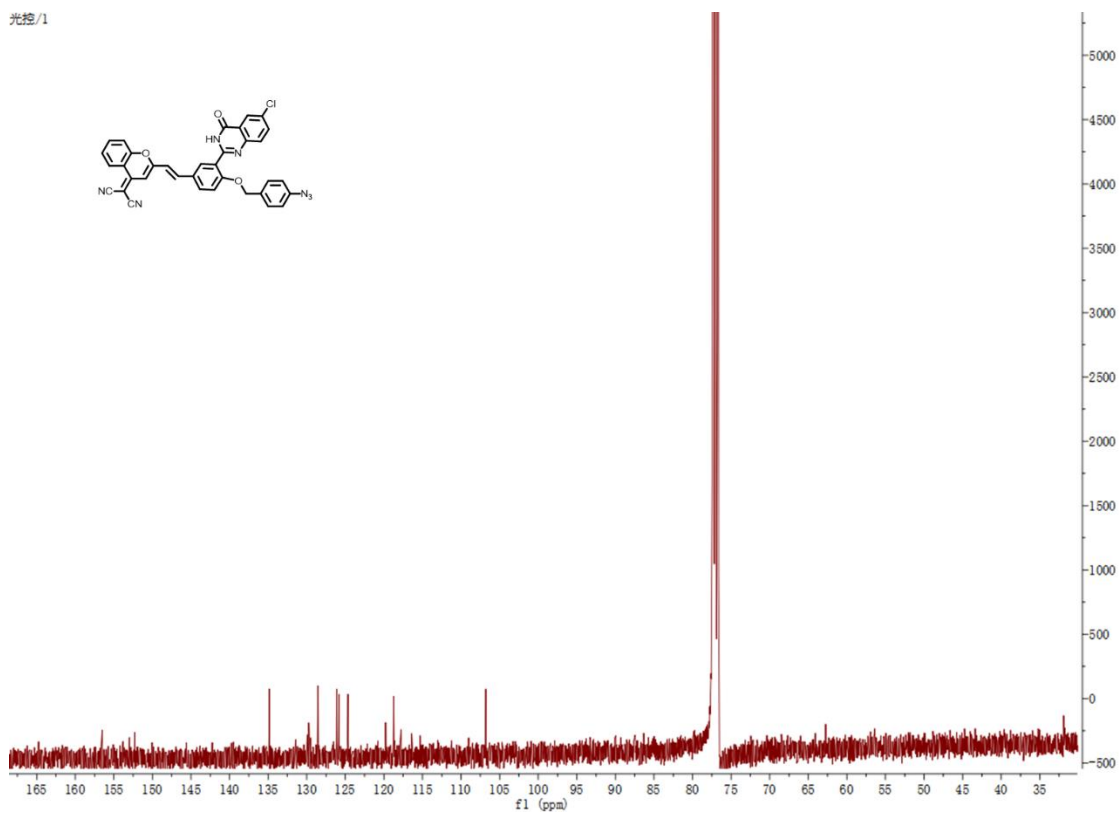

Fig. S67. <sup>13</sup>CNMR spectrum of HYPQ-photoactivatable

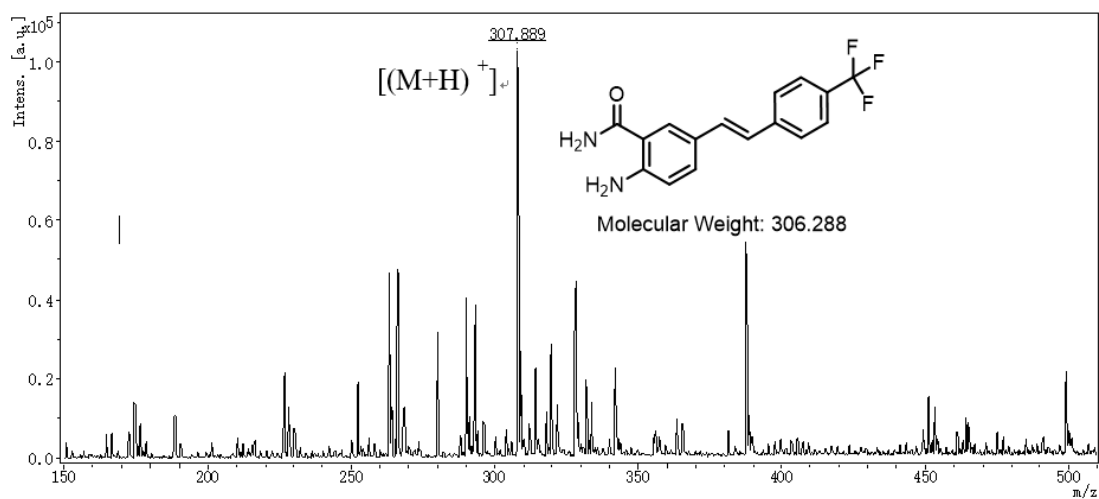

Fig. S68. MALDI-TOF/MS spectrum of compound 3.

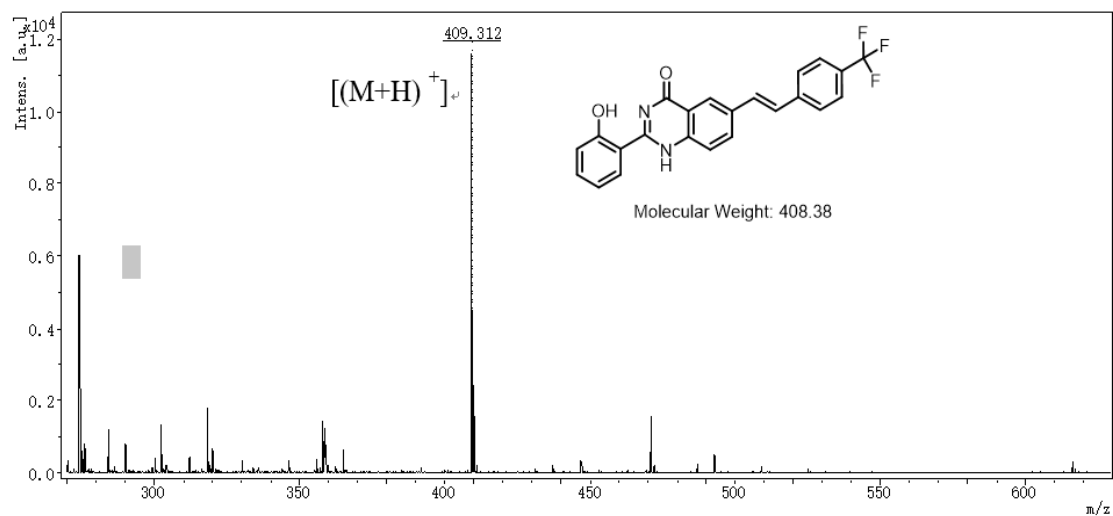

**Fig. S69.** MALDI-TOF/MS spectrum of HPQ1.

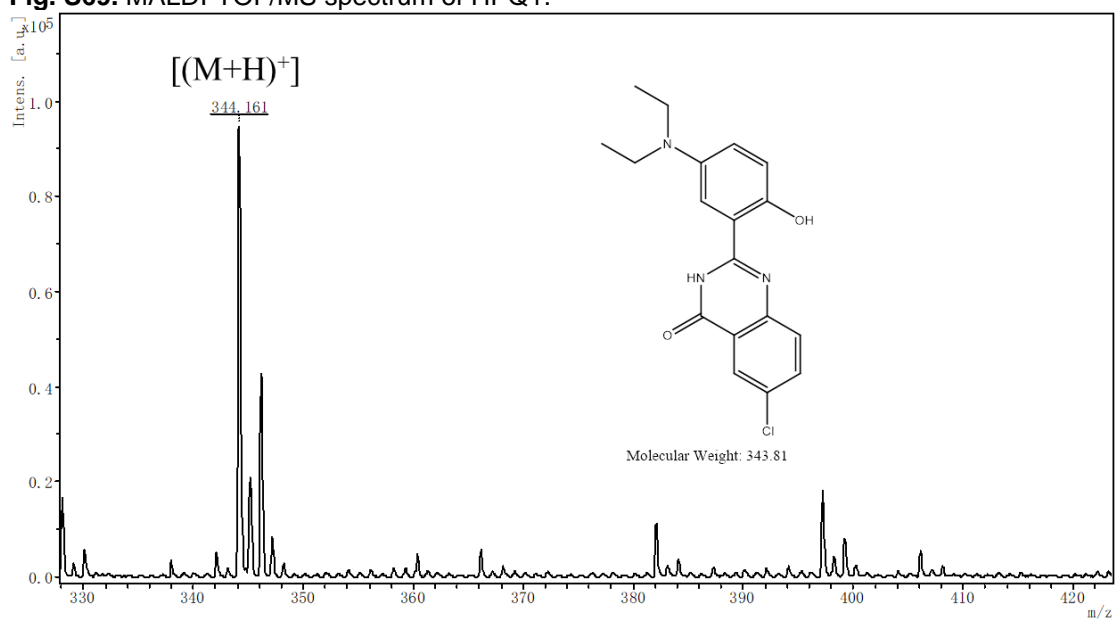

**Fig. S70.** MALDI-TOF/MS spectrum of HPQ2.

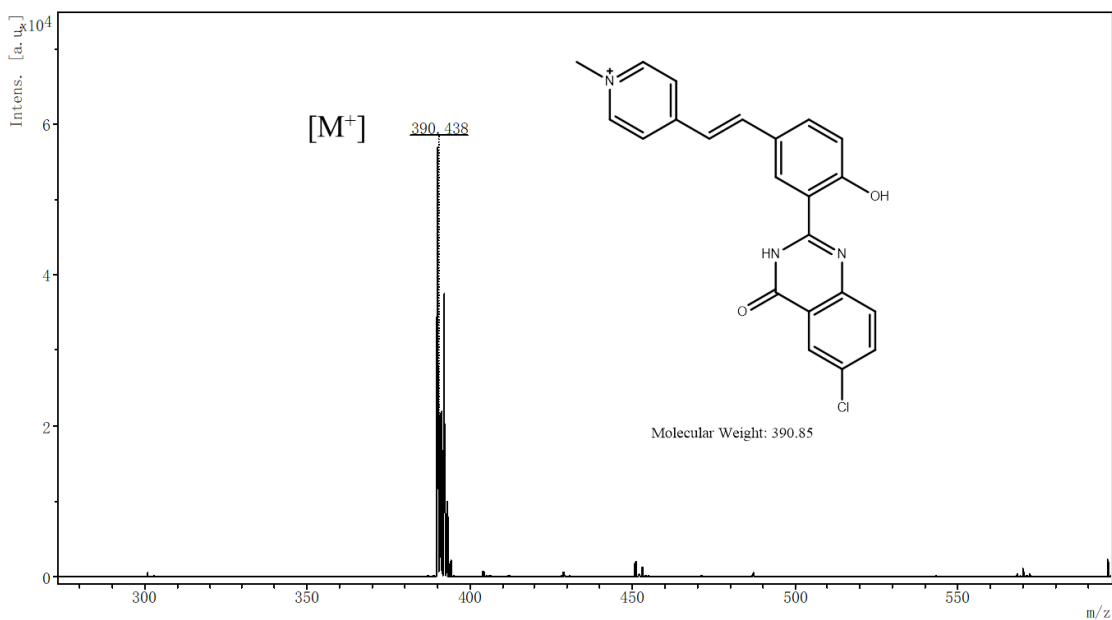

**Fig. S71.** MALDI-TOF/MS spectrum of HPQ3.

236-1 #189 RT: 1.75 AV: 1 NL: 1.71E5  
T: -p ESI Full ms [100.00-400.00]

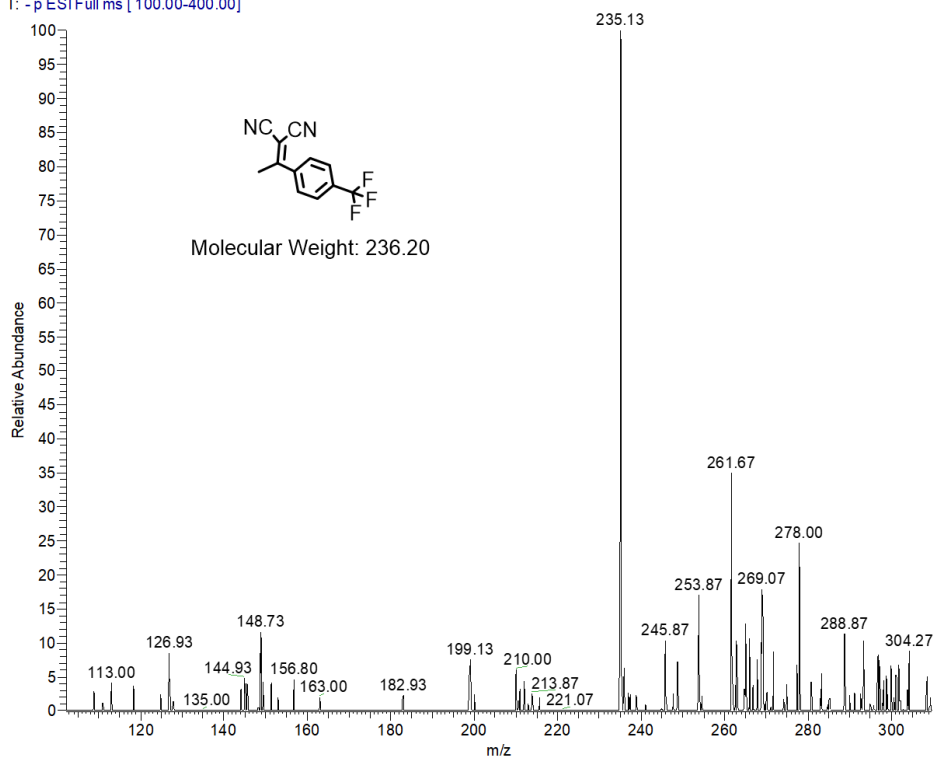

**Fig. S72.** ESI/MS spectrum of compound 7.

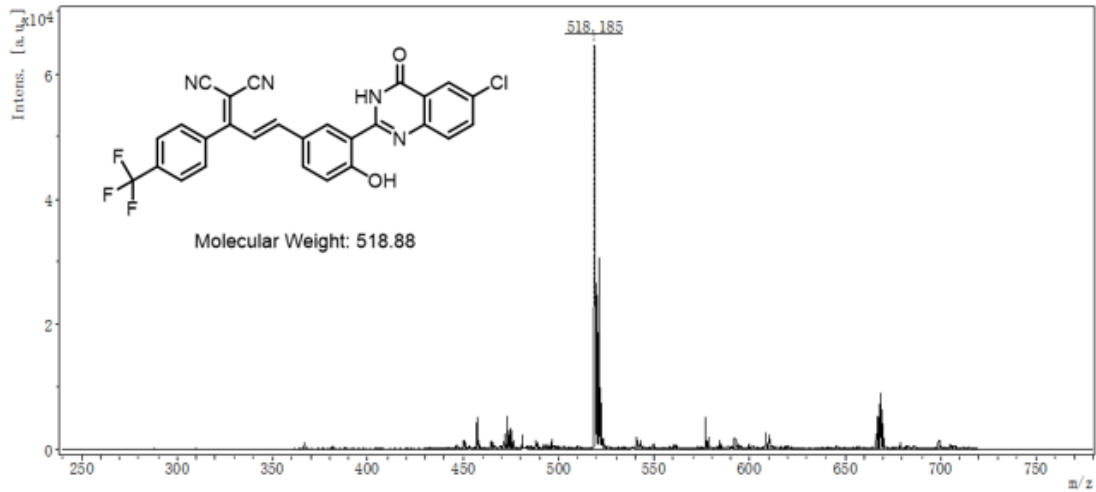

**Fig. S73.** MALDI-TOF/MS spectrum of HPQ4.

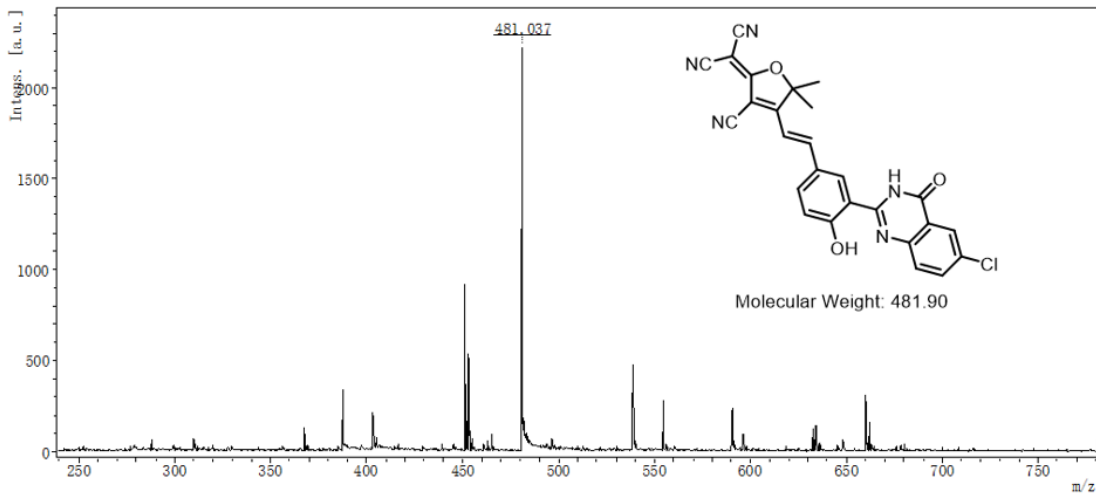

**Fig. S74.** MALDI-TOF/MS spectrum of HPQ5.

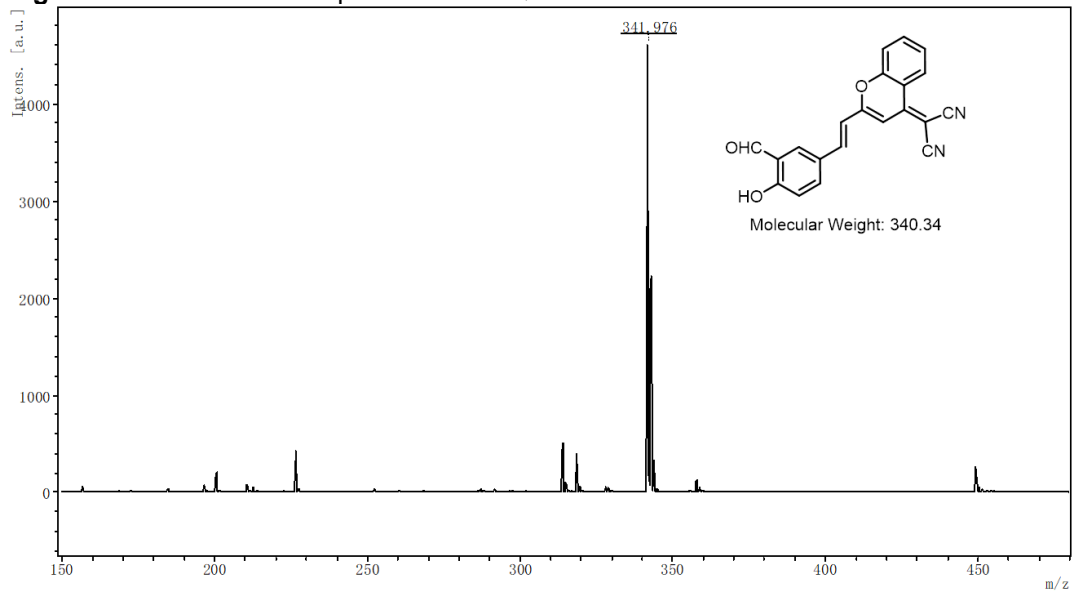

**S75.** MALDI-TOF/MS spectrum of compound 9.

**Fig.**



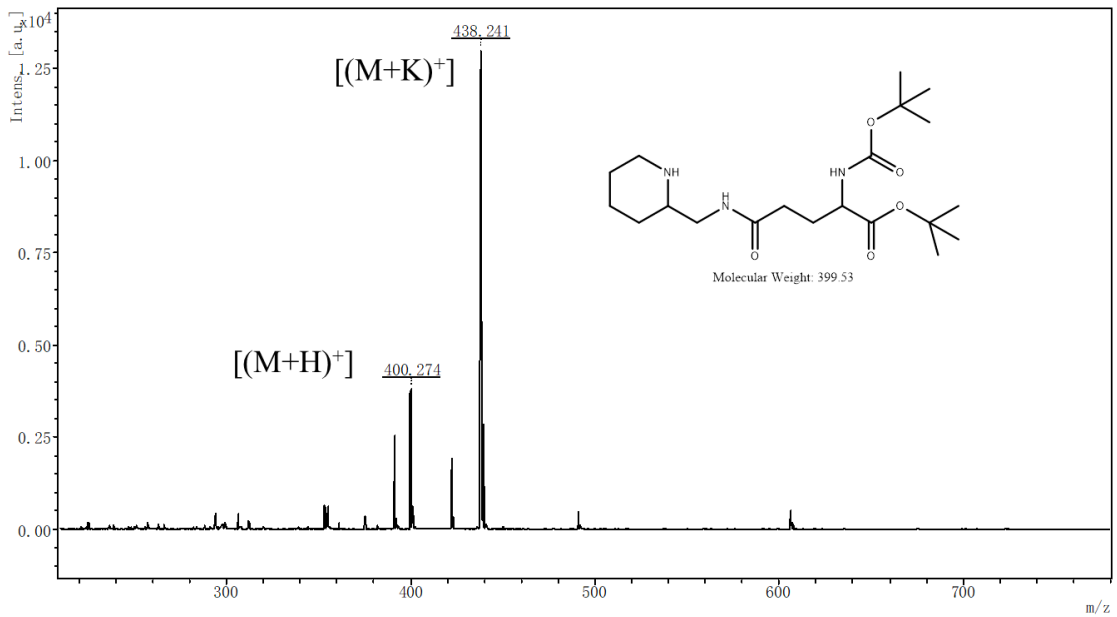

**Fig. S76.** MALDI-TOF/MS spectrum of compound 11.

Ik-490 #26 RT: 0.35 AV: 1 NL: 1.28E6

T: -p ESI Full ms [300.00-800.00]

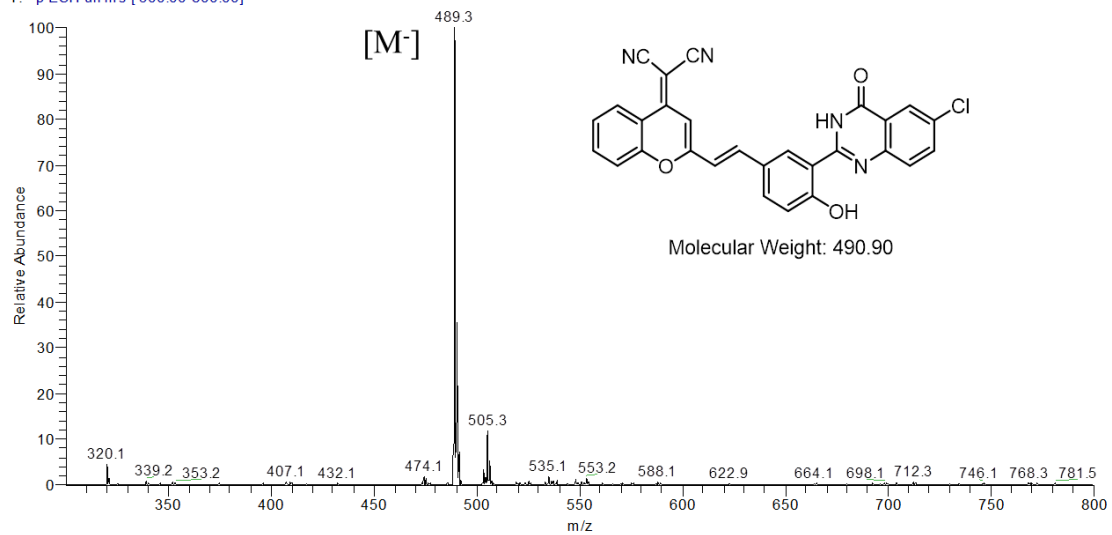

**Fig. S77.** ESI mass spectrum of compound HYPQ.

LK-2

21-Mar-2019

YL-29 24 (0.414) AM (Cen,4, 80.00, Ht,5000.0,0.00,1.00); Sm (Mn, 2x3.00); Cm (1:38)

TOF MS ES+

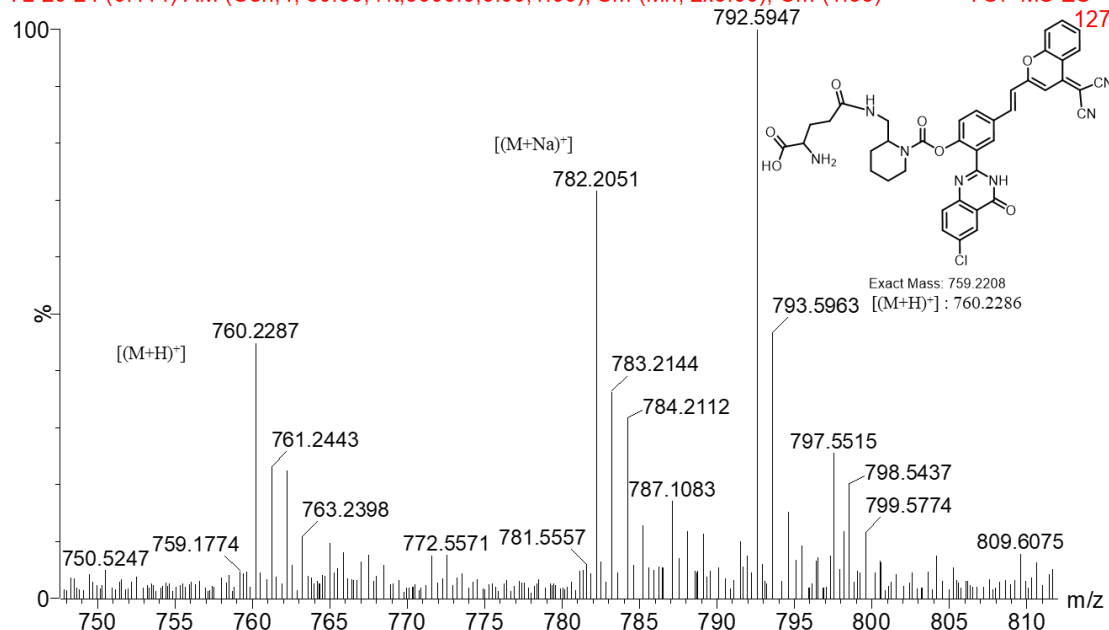

Fig. S78. HRMS mass spectrum of compound HYPQG.

LK-3

21-Mar-2019

YL-30 56 (0.963) AM (Cen,4, 80.00, Ht,5000.0,0.00,1.00); Sm (Mn, 2x3.00); Cm (1:56)

TOF MS ES+

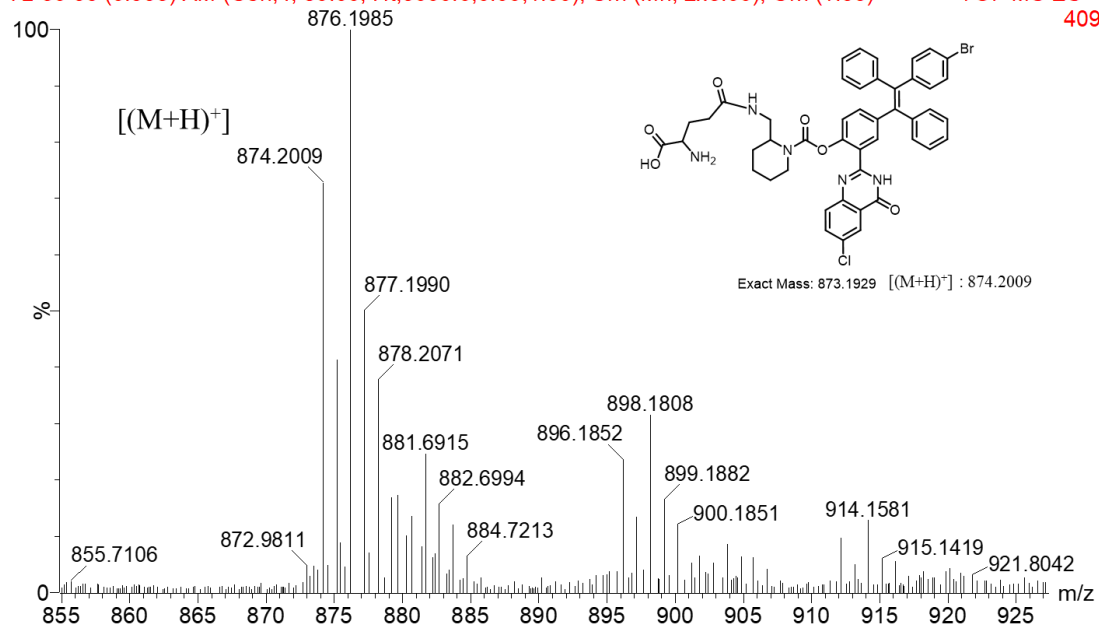

S79. HRMS mass spectrum of compound HTPQG.

Fig.

LK-1

12-Jul-2019

YL-36 2 (0.034) AM (Cen,4, 80.00, Ht,5000.0,0.00,1.00); Sm (Mn, 2x3.00); Cm (1:25)

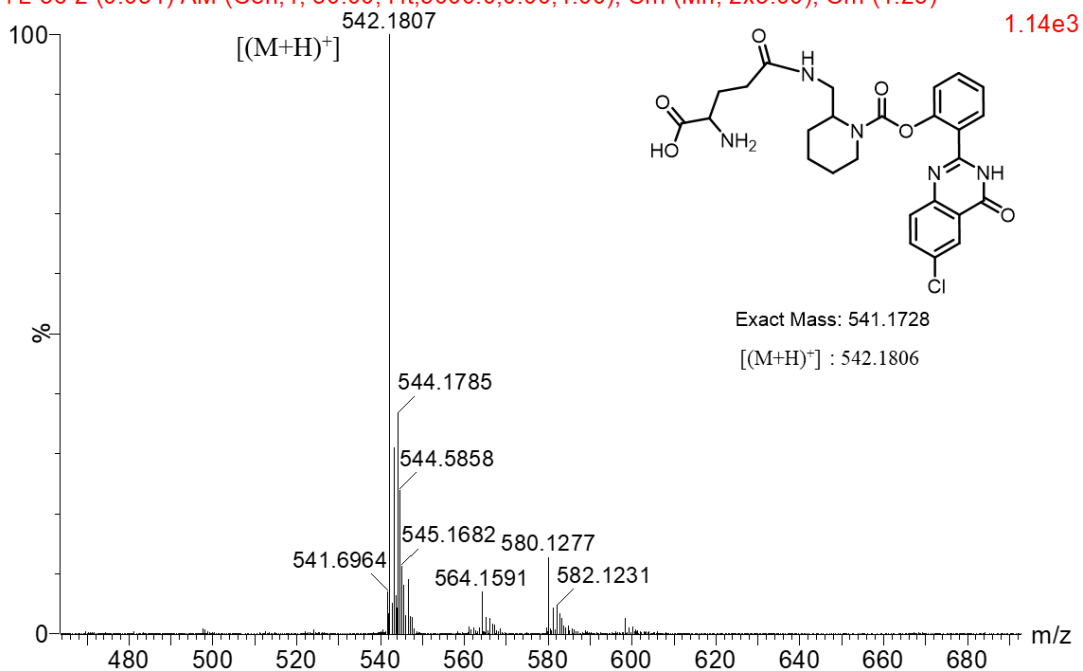

Fig. S80. HRMS mass spectrum of compound HPQG.

LK-2

12-Jul-2019

YL-37 11 (0.190) AM (Cen,4, 80.00, Ht,5000.0,0.00,1.00); Sm (Mn, 2x3.00); Cm (1:23)

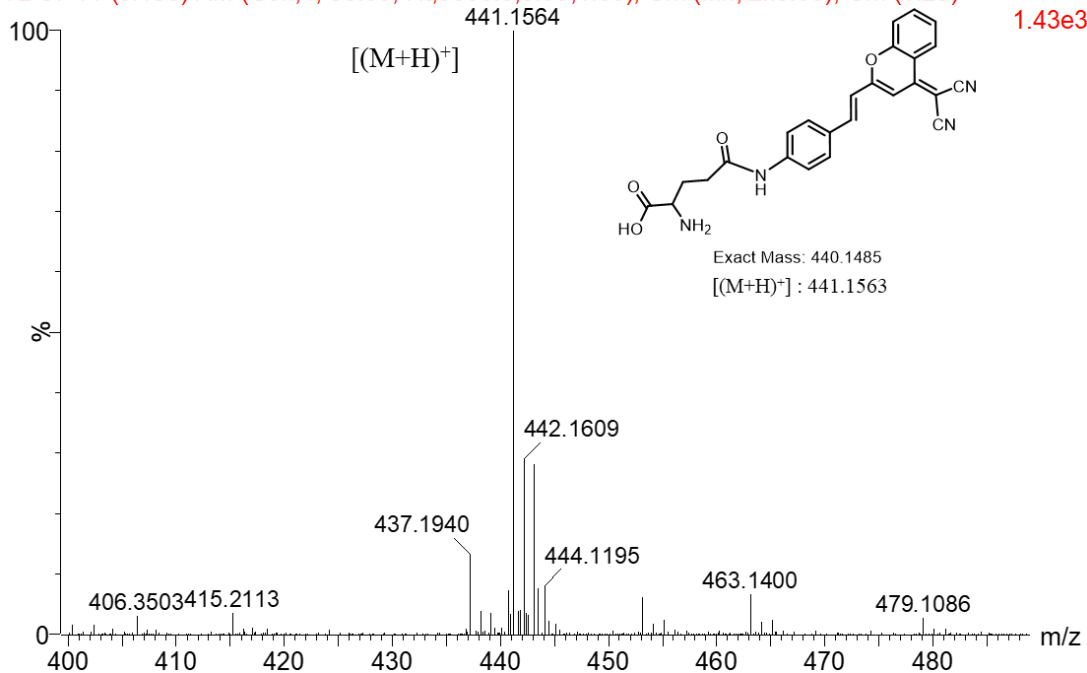

Fig. S81. HRMS mass spectrum of compound DCMG.

1116-L2 89 (0.821) QT (4)

1: TOF MS ES+  
275

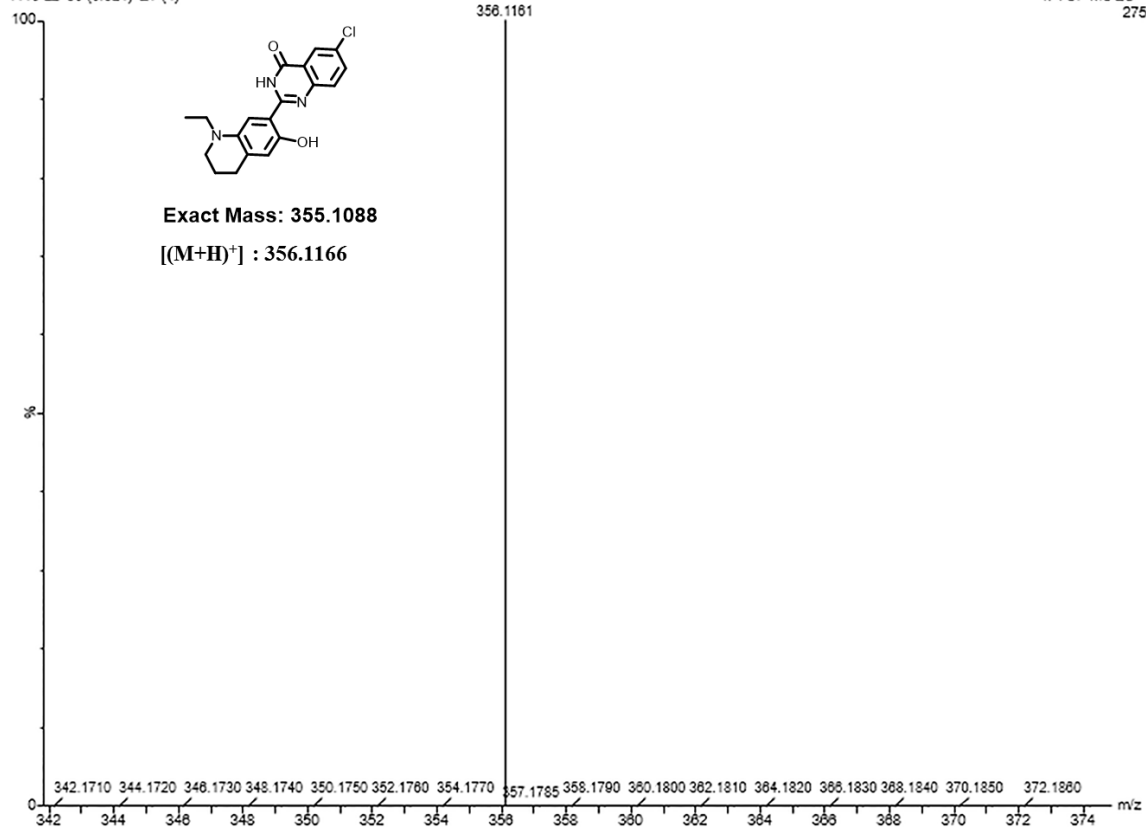

**Fig. S82.** HRMS mass spectrum of compound HPQ-N.

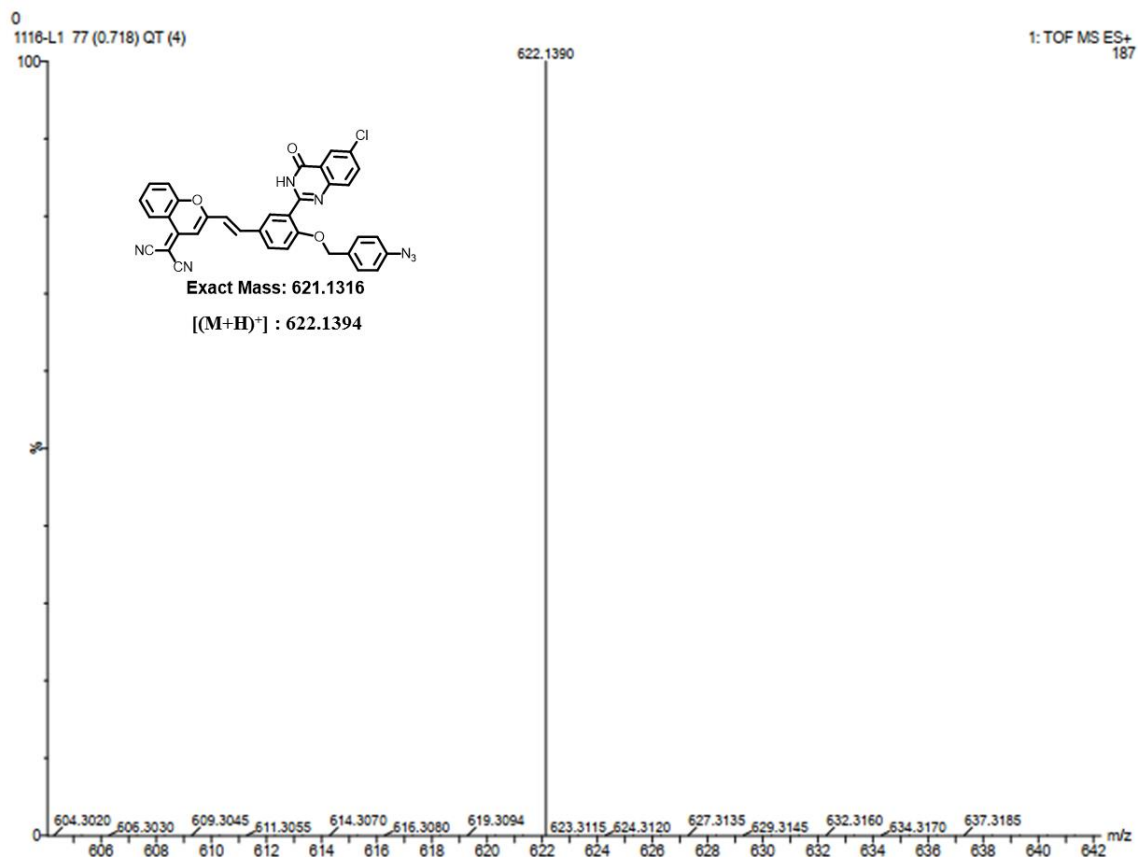

**Fig. S83.** HRMS mass spectrum of compound HYPQ-photoactivatable.

## Detail crystallographic data

**Table S7.**

### Crystal data and structure refinement for HPQ. (CCDC: 2045408)

|                                   |                                                                 |          |
|-----------------------------------|-----------------------------------------------------------------|----------|
| Identification code               | HPQ                                                             |          |
| Empirical formula                 | C <sub>14</sub> H <sub>9</sub> Cl N <sub>2</sub> O <sub>2</sub> |          |
| Formula weight                    | 272.68                                                          |          |
| Temperature                       | 293(2) K                                                        |          |
| Wavelength                        | 1.54184 Å                                                       |          |
| Crystal system                    | Monoclinic                                                      |          |
| Space group                       | P-1                                                             |          |
| Unit cell dimensions              | a = 7.7209(4) Å                                                 | a = 90°. |
| b = 5.9660(3) Å                   | b = 96.453(5)°.                                                 |          |
| c = 26.5444(10) Å                 | g = 90°.                                                        |          |
| Volume                            | 1214.97(10) Å <sup>3</sup>                                      |          |
| Z                                 | 4                                                               |          |
| Density (calculated)              | 1.491 Mg/m <sup>3</sup>                                         |          |
| Absorption coefficient            | 2.785 mm <sup>-1</sup>                                          |          |
| F(000)                            | 560                                                             |          |
| Crystal size                      | 0.1 x 0.05 x 0.05 mm <sup>3</sup>                               |          |
| Theta range for data collection   | 3.351 to 66.598°.                                               |          |
| Index ranges                      | -9 ≤ h ≤ 8, -7 ≤ k ≤ 7, -31 ≤ l ≤ 31                            |          |
| Reflections collected             | 13952                                                           |          |
| Independent reflections           | 2145 [R(int) = 0.0461]                                          |          |
| Completeness to theta = 66.598°   | 100.0 %                                                         |          |
| Absorption correction             | Semi-empirical from equivalents                                 |          |
| Max. and min. transmission        | 1.00000 and 0.78632                                             |          |
| Refinement method                 | Full-matrix least-squares on F <sup>2</sup>                     |          |
| Data / restraints / parameters    | 2145 / 0 / 173                                                  |          |
| Goodness-of-fit on F <sup>2</sup> | 1.040                                                           |          |
| Final R indices [I > 2σ(I)]       | R1 = 0.0532, wR2 = 0.1600                                       |          |
| R indices (all data)              | R1 = 0.0614, wR2 = 0.1683                                       |          |
| Extinction coefficient            | n/a                                                             |          |
| Largest diff. peak and hole       | 0.424 and -0.190 e.Å <sup>-3</sup>                              |          |

**Table S8. Fractional Atomic Coordinates ( $\times 10^4$ ) and Equivalent Isotropic Displacement Parameters ( $\text{\AA}^2 \times 10^3$ ) for HPQ4.  $U_{\text{eq}}$  is defined as 1/3 of the trace of the orthogonalized  $U_{ij}$  tensor.**

| Atom  | <i>x</i> | <i>y</i> | <i>z</i> | $U(\text{eq})$ |
|-------|----------|----------|----------|----------------|
| Cl(1) | 8037(1)  | 5710(2)  | 7358(1)  | 86(1)          |
| O(1)  | 5659(2)  | 9619(3)  | 5599(1)  | 54(1)          |
| O(2)  | 8763(3)  | 1376(3)  | 4461(1)  | 64(1)          |
| N(2)  | 6504(3)  | 7305(3)  | 4993(1)  | 44(1)          |
| N(1)  | 8056(3)  | 3990(3)  | 5176(1)  | 46(1)          |
| C(8)  | 7308(3)  | 5419(4)  | 4844(1)  | 42(1)          |
| C(5)  | 8032(3)  | 4417(4)  | 5688(1)  | 41(1)          |
| C(9)  | 7301(3)  | 4947(4)  | 4300(1)  | 43(1)          |
| C(7)  | 6423(3)  | 7905(4)  | 5492(1)  | 42(1)          |
| C(4)  | 7267(3)  | 6358(4)  | 5859(1)  | 44(1)          |
| C(10) | 6582(3)  | 6467(4)  | 3929(1)  | 48(1)          |
| C(3)  | 7270(3)  | 6782(4)  | 6377(1)  | 51(1)          |
| C(14) | 8004(3)  | 2927(4)  | 4136(1)  | 52(1)          |
| C(6)  | 8779(3)  | 2869(4)  | 6046(1)  | 54(1)          |
| C(2)  | 8024(4)  | 5236(5)  | 6710(1)  | 55(1)          |
| C(11) | 6535(4)  | 6012(5)  | 3421(1)  | 57(1)          |
| C(13) | 7925(4)  | 2482(5)  | 3623(1)  | 61(1)          |
| C(1)  | 8770(4)  | 3266(5)  | 6552(1)  | 59(1)          |
| C(12) | 7211(4)  | 3982(5)  | 3268(1)  | 62(1)          |

---

**Table S9. Bond Lengths for HPQ.**

|             |          |
|-------------|----------|
| Cl(1)-C(2)  | 1.742(3) |
| O(1)-C(7)   | 1.230(3) |
| O(2)-H(2)   | 0.8200   |
| O(2)-C(14)  | 1.354(3) |
| N(2)-H(2A)  | 0.8600   |
| N(2)-C(8)   | 1.365(3) |
| N(2)-C(7)   | 1.380(3) |
| N(1)-C(8)   | 1.312(3) |
| N(1)-C(5)   | 1.386(3) |
| C(8)-C(9)   | 1.471(3) |
| C(5)-C(4)   | 1.399(3) |
| C(5)-C(6)   | 1.401(3) |
| C(9)-C(10)  | 1.405(3) |
| C(9)-C(14)  | 1.411(3) |
| C(7)-C(4)   | 1.444(3) |
| C(4)-C(3)   | 1.398(3) |
| C(10)-H(10) | 0.9300   |
| C(10)-C(11) | 1.373(4) |
| C(3)-H(3)   | 0.9300   |
| C(3)-C(2)   | 1.362(4) |
| C(14)-C(13) | 1.382(4) |
| C(6)-H(6)   | 0.9300   |
| C(6)-C(1)   | 1.366(4) |
| C(2)-C(1)   | 1.394(4) |
| C(11)-H(11) | 0.9300   |
| C(11)-C(12) | 1.397(4) |
| C(13)-H(13) | 0.9300   |
| C(13)-C(12) | 1.369(4) |
| C(1)-H(1)   | 0.9300   |
| C(12)-H(12) | 0.9300   |

**Table S10. Torsion Angles for HPQ.**

|                 |            |
|-----------------|------------|
| C(14)-O(2)-H(2) | 109.5      |
| C(8)-N(2)-H(2A) | 117.9      |
| C(8)-N(2)-C(7)  | 124.27(19) |
| C(7)-N(2)-H(2A) | 117.9      |



|                   |            |
|-------------------|------------|
| C(8)-N(1)-C(5)    | 119.1(2)   |
| N(2)-C(8)-C(9)    | 119.4(2)   |
| N(1)-C(8)-N(2)    | 121.4(2)   |
| N(1)-C(8)-C(9)    | 119.2(2)   |
| N(1)-C(5)-C(4)    | 121.6(2)   |
| N(1)-C(5)-C(6)    | 119.6(2)   |
| C(4)-C(5)-C(6)    | 118.8(2)   |
| C(10)-C(9)-C(8)   | 121.4(2)   |
| C(10)-C(9)-C(14)  | 118.1(2)   |
| C(14)-C(9)-C(8)   | 120.5(2)   |
| O(1)-C(7)-N(2)    | 120.9(2)   |
| O(1)-C(7)-C(4)    | 124.5(2)   |
| N(2)-C(7)-C(4)    | 114.65(19) |
| C(5)-C(4)-C(7)    | 119.0(2)   |
| C(3)-C(4)-C(5)    | 121.0(2)   |
| C(3)-C(4)-C(7)    | 120.0(2)   |
| C(9)-C(10)-H(10)  | 119.2      |
| C(11)-C(10)-C(9)  | 121.6(2)   |
| C(11)-C(10)-H(10) | 119.2      |
| C(4)-C(3)-H(3)    | 121.0      |
| C(2)-C(3)-C(4)    | 118.0(2)   |
| C(2)-C(3)-H(3)    | 121.0      |
| O(2)-C(14)-C(9)   | 122.7(2)   |
| O(2)-C(14)-C(13)  | 117.8(2)   |
| C(13)-C(14)-C(9)  | 119.5(2)   |
| C(5)-C(6)-H(6)    | 119.8      |
| C(1)-C(6)-C(5)    | 120.3(2)   |
| C(1)-C(6)-H(6)    | 119.8      |
| C(3)-C(2)-Cl(1)   | 119.0(2)   |
| C(3)-C(2)-C(1)    | 122.5(2)   |
| C(1)-C(2)-Cl(1)   | 118.5(2)   |
| C(10)-C(11)-H(11) | 120.4      |
| C(10)-C(11)-C(12) | 119.2(3)   |
| C(12)-C(11)-H(11) | 120.4      |
| C(14)-C(13)-H(13) | 119.3      |
| C(12)-C(13)-C(14) | 121.5(2)   |

|                   |          |
|-------------------|----------|
| C(12)-C(13)-H(13) | 119.3    |
| C(6)-C(1)-C(2)    | 119.4(2) |
| C(6)-C(1)-H(1)    | 120.3    |
| C(2)-C(1)-H(1)    | 120.3    |
| C(11)-C(12)-H(12) | 120.0    |
| C(13)-C(12)-C(11) | 120.1(2) |
| C(13)-C(12)-H(12) | 120.0    |

---

Symmetry transformations used to generate equivalent atoms:

**Table S11. Anisotropic Displacement Parameters ( $\text{\AA}^2 \times 10^3$ ) for HPQ4. The Anisotropic displacement factor exponent takes the form:  $-2\pi^2[h^2a^*U_{11}+2hka^*b^*U_{12}+\dots]$ .**

|       | U <sup>11</sup> | U <sup>22</sup> | U <sup>33</sup> | U <sup>23</sup> | U <sup>13</sup> | U <sup>12</sup> |
|-------|-----------------|-----------------|-----------------|-----------------|-----------------|-----------------|
| —     |                 |                 |                 |                 |                 |                 |
| Cl(1) | 115(1)          | 94(1)           | 45(1)           | 2(1)            | -2(1)           | 12(1)           |
| O(1)  | 69(1)           | 45(1)           | 48(1)           | -1(1)           | 6(1)            | 19(1)           |
| O(2)  | 87(1)           | 46(1)           | 62(1)           | -1(1)           | 13(1)           | 21(1)           |
| N(2)  | 50(1)           | 38(1)           | 44(1)           | 4(1)            | 6(1)            | 7(1)            |
| N(1)  | 48(1)           | 39(1)           | 50(1)           | 2(1)            | 5(1)            | 4(1)            |
| C(8)  | 40(1)           | 38(1)           | 48(1)           | 5(1)            | 5(1)            | -2(1)           |
| C(5)  | 38(1)           | 38(1)           | 47(1)           | 2(1)            | 3(1)            | 0(1)            |
| C(9)  | 40(1)           | 38(1)           | 53(1)           | -1(1)           | 10(1)           | 0(1)            |
| C(7)  | 41(1)           | 37(1)           | 48(1)           | 1(1)            | 7(1)            | 2(1)            |
| C(4)  | 41(1)           | 41(1)           | 50(1)           | 2(1)            | 4(1)            | -1(1)           |
| C(10) | 51(1)           | 44(1)           | 49(1)           | 2(1)            | 11(1)           | 6(1)            |
| C(3)  | 52(1)           | 52(1)           | 48(1)           | -3(1)           | 6(1)            | 2(1)            |
| C(14) | 56(2)           | 41(1)           | 59(1)           | 0(1)            | 12(1)           | 2(1)            |
| C(6)  | 54(1)           | 46(1)           | 60(1)           | 6(1)            | -2(1)           | 7(1)            |
| C(2)  | 59(2)           | 61(2)           | 44(1)           | 1(1)            | -1(1)           | -1(1)           |
| C(11) | 64(2)           | 57(2)           | 50(1)           | 3(1)            | 9(1)            | 3(1)            |
| C(13) | 74(2)           | 47(1)           | 63(2)           | -9(1)           | 14(1)           | 4(1)            |
| C(1)  | 62(2)           | 57(2)           | 55(2)           | 11(1)           | -7(1)           | 4(1)            |
| C(12) | 71(2)           | 69(2)           | 48(1)           | -11(1)          | 12(1)           | -3(1)           |

—

**Table S12. Hydrogen Atom Coordinates ( $\text{\AA}\times 10^4$ ) and Isotropic Displacement Parameters ( $\text{\AA}^2\times 10^3$ ) for HPQ.**

|       | x    | y    | z    | U(eq) |
|-------|------|------|------|-------|
| H(2)  | 8726 | 1804 | 4754 | 97    |
| H(2A) | 6016 | 8176 | 4761 | 53    |
| H(10) | 6126 | 7815 | 4031 | 57    |
| H(3)  | 6773 | 8080 | 6491 | 61    |
| H(6)  | 9284 | 1565 | 5938 | 64    |
| H(11) | 6060 | 7042 | 3181 | 68    |
| H(13) | 8366 | 1134 | 3516 | 73    |
| H(1)  | 9256 | 2232 | 6789 | 71    |
| H(12) | 7176 | 3649 | 2925 | 75    |

**Table S13. Crystal data and structure refinement for HPQ4. (CCDC: 2045423)**

|                                    |                                                                       |
|------------------------------------|-----------------------------------------------------------------------|
| Identification code                | HPQ4                                                                  |
| Empirical formula                  | $\text{C}_{54}\text{H}_{28}\text{Cl}_2\text{F}_6\text{N}_8\text{O}_4$ |
| Formula weight                     | 1037.74                                                               |
| Temperature/K                      | 150.00(10)                                                            |
| Crystal system                     | triclinic                                                             |
| Space group                        | P-1                                                                   |
| a/ $\text{\AA}$                    | 13.1263(7)                                                            |
| b/ $\text{\AA}$                    | 21.3743(10)                                                           |
| c/ $\text{\AA}$                    | 21.6785(11)                                                           |
| $\alpha/^\circ$                    | 65.178(5)                                                             |
| $\beta/^\circ$                     | 77.671(4)                                                             |
| $\gamma/^\circ$                    | 85.732(4)                                                             |
| Volume/ $\text{\AA}^3$             | 5392.2(5)                                                             |
| Z                                  | 4                                                                     |
| $\rho_{\text{calc}}/\text{g/cm}^3$ | 1.278                                                                 |
| $\mu/\text{mm}^{-1}$               | 1.702                                                                 |
| F(000)                             | 2112.0                                                                |
| Crystal size/ $\text{mm}^3$        | 0.110 $\times$ 0.100 $\times$ 0.080                                   |

|                                                |                                                                    |
|------------------------------------------------|--------------------------------------------------------------------|
| Radiation                                      | Cu K $\alpha$ ( $\lambda = 1.54184$ )                              |
| 2 $\theta$ range for data collection/ $^\circ$ | 4.556 to 147.844                                                   |
| Index ranges                                   | $-16 \leq h \leq 15$ , $-25 \leq k \leq 26$ , $-17 \leq l \leq 26$ |
| Reflections collected                          | 39432                                                              |
| Independent reflections                        | 21154 [ $R_{\text{int}} = 0.0700$ , $R_{\text{sigma}} = 0.0847$ ]  |
| Data/restraints/parameters                     | 21154/70/1393                                                      |
| Goodness-of-fit on $F^2$                       | 1.061                                                              |
| Final R indexes [ $I \geq 2\sigma(I)$ ]        | $R_1 = 0.0647$ , $wR_2 = 0.1795$                                   |
| Final R indexes [all data]                     | $R_1 = 0.1027$ , $wR_2 = 0.2050$                                   |
| Largest diff. peak/hole / e $\text{\AA}^{-3}$  | 0.73/-0.58                                                         |

### Crystal structure determination of [HPQ4]

**Crystal Data** for  $C_{54}H_{28}Cl_2F_6N_8O_4$  ( $M=1037.74$  g/mol): triclinic, space group P-1 (no. 2),  $a = 13.1263(7)$   $\text{\AA}$ ,  $b = 21.3743(10)$   $\text{\AA}$ ,  $c = 21.6785(11)$   $\text{\AA}$ ,  $\alpha = 65.178(5)^\circ$ ,  $\beta = 77.671(4)^\circ$ ,  $\gamma = 85.732(4)^\circ$ ,  $V = 5392.2(5)$   $\text{\AA}^3$ ,  $Z = 4$ ,  $T = 150.00(10)$  K,  $\mu(\text{Cu K}\alpha) = 1.702$   $\text{mm}^{-1}$ ,  $D_{\text{calc}} = 1.278$   $\text{g/cm}^3$ , 39432 reflections measured ( $4.556^\circ \leq 2\theta \leq 147.844^\circ$ ), 21154 unique ( $R_{\text{int}} = 0.0700$ ,  $R_{\text{sigma}} = 0.0847$ ) which were used in all calculations. The final  $R_1$  was 0.0647 ( $I > 2\sigma(I)$ ) and  $wR_2$  was 0.2050 (all data).

**Table S14 Fractional Atomic Coordinates ( $\times 10^4$ ) and Equivalent Isotropic Displacement Parameters ( $\text{\AA}^2 \times 10^3$ ) for HPQ4.  $U_{\text{eq}}$  is defined as 1/3 of the trace of the orthogonalised  $U_{ij}$  tensor.**

| Atom | x         | y           | z           | $U_{\text{eq}}$ |
|------|-----------|-------------|-------------|-----------------|
| Cl1  | 6710.2(8) | -3545.2(5)  | 8902.7(5)   | 39.1(2)         |
| F7   | 5472(4)   | 4516(2)     | 9664(2)     | 106.0(14)       |
| F8   | 6834(2)   | 4990.7(17)  | 8936(2)     | 73.9(10)        |
| F9   | 5297(3)   | 5335.1(16)  | 8732(2)     | 85.7(12)        |
| O1   | 6528(2)   | -758.1(13)  | 7818.6(12)  | 34.0(6)         |
| O4   | 6335(2)   | -963.7(12)  | 10880.0(12) | 29.8(5)         |
| N3   | 6512(2)   | -505.2(14)  | 8738.7(14)  | 25.5(6)         |
| N4   | 6406(2)   | -1333.6(14) | 9879.1(15)  | 25.0(6)         |
| N7   | 5099(3)   | 2036(2)     | 6867(2)     | 55.7(10)        |
| N8   | 5639(5)   | 4206(2)     | 6385(3)     | 81.2(16)        |
| C28  | 6580(3)   | -2879.4(18) | 9173.4(19)  | 28.4(7)         |
| C29  | 6498(3)   | -3047.9(18) | 9876(2)     | 33.8(8)         |
| C30  | 6428(3)   | -2531.1(18) | 10107(2)    | 32.7(8)         |
| C31  | 6451(3)   | -1840.2(17) | 9630.4(18)  | 24.3(7)         |
| C32  | 6506(3)   | -1682.7(17) | 8926.0(18)  | 25.9(7)         |
| C33  | 6567(3)   | -2211.7(18) | 8699.8(19)  | 28.9(7)         |
| C34  | 6516(3)   | -961.7(18)  | 8440.8(18)  | 26.1(7)         |
| C35  | 6425(2)   | -688.7(17)  | 9435.3(17)  | 23.0(7)         |
| C36  | 6337(3)   | -142.6(17)  | 9692.3(17)  | 23.5(7)         |
| C37  | 6235(3)   | 548.4(17)   | 9251.7(18)  | 26.1(7)         |
| C38  | 6119(3)   | 1071.7(17)  | 9480.0(18)  | 25.6(7)         |
| C39  | 6114(3)   | 884.5(18)   | 10188(2)    | 31.0(8)         |

**Table S14 Fractional Atomic Coordinates ( $\times 10^4$ ) and Equivalent Isotropic Displacement Parameters ( $\text{\AA}^2 \times 10^3$ ) for HPQ4.  $U_{\text{eq}}$  is defined as 1/3 of the trace of the orthogonalised  $U_{ij}$  tensor.**

| Atom | x          | y           | z           | U(eq)    |
|------|------------|-------------|-------------|----------|
| C40  | 6188(3)    | 209.2(19)   | 10637.0(19) | 28.7(7)  |
| C41  | 6291(3)    | -316.5(18)  | 10405.7(18) | 26.0(7)  |
| C42  | 5973(3)    | 1790.4(18)  | 9029.8(19)  | 28.9(7)  |
| C43  | 5853(3)    | 2034.2(18)  | 8370(2)     | 31.3(8)  |
| C44  | 5734(3)    | 2747.2(18)  | 7924.7(19)  | 27.6(7)  |
| C45  | 5552(3)    | 2936(2)     | 7274(2)     | 34.4(8)  |
| C46  | 5582(4)    | 3642(2)     | 6781(3)     | 50.0(11) |
| C47  | 5311(3)    | 2436(2)     | 7041(2)     | 39.7(9)  |
| C48  | 5810(3)    | 3296.8(17)  | 8162.8(19)  | 29.9(7)  |
| C49  | 4991(3)    | 3756.5(18)  | 8143(2)     | 34.7(8)  |
| C50  | 5031(3)    | 4259(2)     | 8384(2)     | 42.3(10) |
| C51  | 5893(4)    | 4309(2)     | 8634(3)     | 44.5(10) |
| C52  | 6718(3)    | 3867(2)     | 8637(2)     | 44.1(10) |
| C53  | 6681(3)    | 3363(2)     | 8400(2)     | 38.3(9)  |
| C54  | 5901(5)    | 4814(3)     | 8946(4)     | 70.1(17) |
| Cl2  | 8749.1(12) | 3281.6(6)   | 6807.7(6)   | 59.4(3)  |
| O2   | 7151(3)    | 754.9(14)   | 7707.9(14)  | 42.2(7)  |
| O3   | 6949(2)    | 1438.0(13)  | 4578.0(13)  | 34.5(6)  |
| N1   | 3915(3)    | -4111(2)    | 7269(2)     | 54.3(10) |
| N2   | 5496(6)    | -2747(3)    | 5136(3)     | 117(3)   |
| N5   | 6837(2)    | 679.8(15)   | 6752.6(15)  | 29.5(6)  |
| N6   | 7089(2)    | 1609.7(15)  | 5653.0(16)  | 30.9(7)  |
| C1   | 4747(3)    | -2392(2)    | 6592(2)     | 33.1(8)  |
| C2   | 5209(3)    | -1729(2)    | 6108(2)     | 34.6(8)  |
| C3   | 5417(3)    | -1240.8(18) | 6306.2(19)  | 30.0(7)  |
| C4   | 4723(4)    | -2919(2)    | 6396(2)     | 43.2(10) |
| C5   | 5147(5)    | -2830(3)    | 5692(3)     | 67.1(16) |
| C6   | 4270(4)    | -3587(2)    | 6876(2)     | 45.0(10) |
| C7   | 4256(3)    | -2499.2(18) | 7319.0(19)  | 29.5(7)  |
| C8   | 3423(3)    | -2088(2)    | 7419(2)     | 40.6(8)  |
| C9   | 2935(3)    | -2177(2)    | 8081(2)     | 45.0(8)  |
| C10  | 3296(3)    | -2665(2)    | 8647(2)     | 43.1(10) |
| C11  | 4128(3)    | -3074(2)    | 8552(2)     | 42.7(8)  |
| C12  | 4604(3)    | -2990(2)    | 7886(2)     | 39.0(8)  |
| C13  | 2796(5)    | -2746(3)    | 9371(3)     | 65.0(14) |
| C14  | 5866(3)    | -558.2(18)  | 5850.3(19)  | 28.2(7)  |
| C15  | 6073(3)    | -302.2(19)  | 5125.9(19)  | 30.3(8)  |
| C16  | 6450(3)    | 353.6(19)   | 4714.4(19)  | 31.2(8)  |
| C17  | 6633(3)    | 793.0(19)   | 5017(2)     | 30.8(8)  |
| C18  | 6496(3)    | 539.8(18)   | 5742.9(18)  | 27.8(7)  |
| C19  | 6097(3)    | -134.8(18)  | 6147.5(19)  | 28.6(7)  |
| C20  | 6805(3)    | 970.4(18)   | 6056.4(19)  | 28.9(7)  |
| C21  | 7170(3)    | 1028.4(18)  | 7080.4(19)  | 31.6(8)  |

**Table S14 Fractional Atomic Coordinates ( $\times 10^4$ ) and Equivalent Isotropic Displacement Parameters ( $\text{\AA}^2 \times 10^3$ ) for HPQ4.  $U_{\text{eq}}$  is defined as 1/3 of the trace of the orthogonalised  $U_{ij}$  tensor.**

| Atom | x          | y           | z          | U(eq)   |
|------|------------|-------------|------------|---------|
| C22  | 7535(3)    | 1725.8(18)  | 6639(2)    | 32.6(8) |
| C23  | 7457(3)    | 2003.7(18)  | 5936.8(19) | 30.0(7) |
| C24  | 7764(4)    | 2692(2)     | 5511(2)    | 39.7(9) |
| C25  | 8150(4)    | 3079(2)     | 5784(2)    | 40.3(9) |
| C26  | 8236(3)    | 2786(2)     | 6483(2)    | 38.3(9) |
| C27  | 7934(3)    | 2120.5(19)  | 6911(2)    | 33.8(8) |
| F2   | 2608(9)    | -3370(3)    | 9815(3)    | 159(4)  |
| F1   | 1897(6)    | -2418(6)    | 9398(3)    | 154(4)  |
| F3   | 3405(17)   | -3114(13)   | 9799(9)    | 66(2)   |
| F03{ | 3358(6)    | -2478(4)    | 9627(3)    | 123(3)  |
| F04C | 1914(18)   | -3043(14)   | 9550(11)   | 68(3)   |
| F14  | 2650(20)   | -2149(10)   | 9375(10)   | 63(3)   |
| Cl3  | 10782.9(8) | 7305.9(4)   | 1315.5(5)  | 39.1(2) |
| F10  | 10601(3)   | 15884.7(13) | 1112.6(15) | 69.0(9) |
| F11  | 10194(3)   | 15649.1(14) | 2199.3(15) | 69.4(9) |
| F12  | 9017(3)    | 15926.2(13) | 1601.4(17) | 67.6(8) |
| O6   | 10366(2)   | 9176.1(12)  | 2415.0(12) | 34.6(6) |
| O8   | 11403(2)   | 11540.1(12) | -673.3(12) | 28.7(5) |
| N11  | 11059(2)   | 10322.9(14) | 330.9(14)  | 23.3(6) |
| N12  | 10678(2)   | 10201.9(14) | 1480.8(15) | 27.7(6) |
| N15  | 8758(3)    | 10970.5(15) | 3550.4(17) | 33.9(7) |
| N16  | 7919(3)    | 12885.7(17) | 3855.9(18) | 43.0(8) |
| C82  | 10704(3)   | 8464.4(18)  | 1524(2)    | 29.3(7) |
| C83  | 10904(3)   | 8189.8(18)  | 1043(2)    | 29.7(7) |
| C84  | 11176(3)   | 8606.3(18)  | 329.1(19)  | 29.1(7) |
| C85  | 11229(3)   | 9312.6(18)  | 98.3(18)   | 26.6(7) |
| C86  | 11027(2)   | 9609.6(16)  | 576.4(17)  | 22.9(6) |
| C87  | 10775(3)   | 9180.3(17)  | 1289.3(18) | 25.4(7) |
| C88  | 10590(3)   | 9493.3(17)  | 1779.1(19) | 28.2(7) |
| C89  | 10882(3)   | 10597.8(16) | 776.6(17)  | 23.3(7) |
| C90  | 10860(3)   | 11352.6(16) | 530.7(17)  | 23.6(7) |
| C91  | 11144(3)   | 11783.4(17) | -183.5(17) | 23.5(7) |
| C92  | 11141(3)   | 12497.6(17) | -402.6(18) | 27.5(7) |
| C93  | 10848(3)   | 12785.1(17) | 69.5(18)   | 27.5(7) |
| C94  | 10538(3)   | 12374.2(17) | 778.0(17)  | 26.5(7) |
| C95  | 10550(3)   | 11661.0(17) | 993.3(17)  | 25.4(7) |
| C96  | 10190(3)   | 12688.8(17) | 1265.5(17) | 26.8(7) |
| C97  | 9845(3)    | 12349.6(17) | 1953.7(18) | 27.8(7) |
| C98  | 9394(3)    | 12676.5(17) | 2417.6(17) | 24.9(7) |
| C99  | 8871(3)    | 12298.3(17) | 3073.5(17) | 25.1(7) |
| C100 | 8788(3)    | 11559.3(17) | 3347.6(18) | 27.3(7) |
| C101 | 8350(3)    | 12616.2(17) | 3522.6(18) | 29.4(7) |
| C102 | 9511(3)    | 13432.2(16) | 2181.8(17) | 25.9(7) |

**Table S14 Fractional Atomic Coordinates ( $\times 10^4$ ) and Equivalent Isotropic Displacement Parameters ( $\text{\AA}^2 \times 10^3$ ) for HPQ4.  $U_{\text{eq}}$  is defined as 1/3 of the trace of the orthogonalised  $U_{ij}$  tensor.**

| Atom | x          | y           | z          | U(eq)    |
|------|------------|-------------|------------|----------|
| C103 | 10509(3)   | 13724.0(19) | 2001(2)    | 34.1(8)  |
| C104 | 10621(3)   | 14418(2)    | 1841(2)    | 37.6(9)  |
| C105 | 9743(3)    | 14819.5(18) | 1851.7(18) | 32.9(8)  |
| C106 | 8756(3)    | 14540.8(19) | 2013.0(19) | 34.5(8)  |
| C107 | 8642(3)    | 13844.9(18) | 2179.7(19) | 30.4(7)  |
| C108 | 9893(4)    | 15563(2)    | 1688(2)    | 44.9(10) |
| Cl4  | 12389.3(8) | 12458.8(5)  | 3237.8(5)  | 41.5(2)  |
| O5   | 10553(2)   | 8386.9(13)  | 5506.2(13) | 31.2(5)  |
| O7   | 10932(2)   | 10711.5(13) | 2425.1(13) | 36.7(6)  |
| N9   | 6763(3)    | 7396.3(17)  | 1730.6(17) | 37.9(8)  |
| N10  | 8220(3)    | 9224.4(16)  | 1669.4(17) | 33.9(7)  |
| N13  | 10579(2)   | 9717.1(14)  | 3393.8(14) | 26.8(6)  |
| N14  | 10815(2)   | 9586.2(15)  | 4486.1(14) | 24.9(6)  |
| C55  | 6773(8)    | 4669(3)     | 4256(4)    | 99.1(17) |
| C56  | 7052(4)    | 5416(2)     | 3932(2)    | 51.6(12) |
| C57  | 7865(5)    | 5653(2)     | 3368(3)    | 66.1(16) |
| C58  | 8143(5)    | 6348(2)     | 3058(2)    | 56.7(14) |
| C60  | 6804(3)    | 6553(2)     | 3881(2)    | 39.5(9)  |
| C61  | 6517(4)    | 5860(2)     | 4190(2)    | 47.8(11) |
| C62  | 7928(3)    | 7539.8(19)  | 2964.6(18) | 30.0(7)  |
| C63  | 7718(3)    | 7929.6(18)  | 2322.4(18) | 28.1(7)  |
| C64  | 7190(3)    | 7636.9(19)  | 1985.2(19) | 30.3(8)  |
| C65  | 7991(3)    | 8647.4(19)  | 1956.6(17) | 27.9(7)  |
| C66  | 8436(3)    | 7830.6(19)  | 3314.2(18) | 30.6(8)  |
| C67  | 8655(3)    | 7467.8(19)  | 3949.5(19) | 33.2(8)  |
| C68  | 9169(3)    | 7724.2(19)  | 4330.6(19) | 32.2(8)  |
| C69  | 9582(3)    | 8389.6(18)  | 4040.9(18) | 30.1(7)  |
| C70  | 10080(3)   | 8631.4(17)  | 4406.8(17) | 25.5(7)  |
| C71  | 10136(3)   | 8188.7(18)  | 5101.8(18) | 27.9(7)  |
| C72  | 9733(3)    | 7517.5(19)  | 5389(2)    | 33.5(8)  |
| C73  | 9269(3)    | 7287.2(19)  | 5014(2)    | 34.6(8)  |
| C74  | 10511(3)   | 9335.9(17)  | 4096.1(17) | 25.1(7)  |
| C75  | 10916(3)   | 10392.6(18) | 3049.6(18) | 27.5(7)  |
| C76  | 11254(3)   | 10678.2(18) | 3473.6(18) | 25.9(7)  |
| C77  | 11191(3)   | 10262.0(17) | 4179.4(17) | 23.9(7)  |
| C78  | 11618(3)   | 11357.7(18) | 3181.3(19) | 29.7(7)  |
| C79  | 11931(3)   | 11615.5(18) | 3598(2)    | 31.7(8)  |
| C80  | 11878(3)   | 11207.0(18) | 4304.7(19) | 29.8(7)  |
| C81  | 11509(3)   | 10536.6(18) | 4598.6(18) | 26.4(7)  |
| F13  | 6340(10)   | 4508(4)     | 3847(4)    | 101(2)   |
| F15  | 7647(10)   | 4273(4)     | 4353(5)    | 113(2)   |
| F16  | 6044(10)   | 4478(4)     | 4834(5)    | 107(2)   |
| C59  | 7614(3)    | 6795.7(19)  | 3313.1(19) | 33.1(8)  |



**Table S14 Fractional Atomic Coordinates ( $\times 10^4$ ) and Equivalent Isotropic Displacement Parameters ( $\text{\AA}^2 \times 10^3$ ) for HPQ4.  $U_{\text{eq}}$  is defined as 1/3 of the trace of the orthogonalised  $U_{ij}$  tensor.**

| Atom | x        | y       | z       | $U(\text{eq})$ |
|------|----------|---------|---------|----------------|
| F4   | 5769(11) | 4536(5) | 4338(7) | 123(3)         |
| F5   | 7228(12) | 4294(5) | 3959(8) | 131(6)         |
| F6   | 6879(12) | 4363(4) | 4908(5) | 108(2)         |

**Table S15 Anisotropic Displacement Parameters ( $\text{\AA}^2 \times 10^3$ ) for HPQ4. The Anisotropic displacement factor exponent takes the form:  $-2\pi^2[h^2a^*U_{11}+2hka^*b^*U_{12}+\dots]$ .**

| Atom | $U_{11}$ | $U_{22}$ | $U_{33}$ | $U_{23}$  | $U_{13}$  | $U_{12}$ |
|------|----------|----------|----------|-----------|-----------|----------|
| Cl1  | 51.7(6)  | 25.2(4)  | 51.1(6)  | -24.1(4)  | -15.4(4)  | 3.5(4)   |
| F7   | 139(4)   | 106(3)   | 102(3)   | -79(3)    | -3(3)     | -10(3)   |
| F8   | 64.9(19) | 70(2)    | 124(3)   | -71(2)    | -24.3(19) | -5.0(15) |
| F9   | 96(3)    | 56.4(19) | 148(3)   | -74(2)    | -55(2)    | 25.4(18) |
| O1   | 55.2(17) | 25.5(12) | 22.4(13) | -11.0(10) | -7.5(11)  | 0.4(11)  |
| O4   | 40.6(14) | 25.4(12) | 29.0(13) | -15.4(10) | -10.9(11) | 3.6(10)  |
| N3   | 36.4(16) | 18.7(13) | 22.6(14) | -11.4(11) | -2.1(12)  | -0.3(11) |
| N4   | 26.7(14) | 21.9(14) | 31.2(15) | -14.9(12) | -7.1(12)  | 0.7(11)  |
| N7   | 58(2)    | 63(3)    | 69(3)    | -46(2)    | -24(2)    | 10(2)    |
| N8   | 130(5)   | 48(3)    | 58(3)    | -2(2)     | -40(3)    | -10(3)   |
| C28  | 33.0(18) | 22.5(16) | 37(2)    | -18.3(15) | -9.1(15)  | 0.6(14)  |
| C29  | 44(2)    | 19.1(16) | 41(2)    | -11.5(15) | -15.3(17) | 2.7(15)  |
| C30  | 42(2)    | 24.2(17) | 37(2)    | -13.7(16) | -15.7(17) | 2.7(15)  |
| C31  | 28.3(17) | 22.4(16) | 28.8(17) | -17.0(14) | -6.2(14)  | 1.6(13)  |
| C32  | 30.1(17) | 19.6(16) | 30.5(18) | -12.3(14) | -7.1(14)  | 0.4(13)  |
| C33  | 33.7(19) | 25.0(17) | 33.0(19) | -15.9(15) | -8.2(15)  | -0.5(14) |
| C34  | 30.7(18) | 24.9(17) | 25.2(17) | -14.0(14) | -2.6(14)  | -0.4(13) |
| C35  | 22.8(16) | 22.7(16) | 29.0(17) | -15.8(14) | -5.6(13)  | 1.2(12)  |
| C36  | 24.4(16) | 24.5(16) | 26.8(17) | -17.3(14) | -2.0(13)  | 0.7(13)  |
| C37  | 26.4(17) | 26.6(17) | 28.8(18) | -16.6(15) | -1.3(14)  | -1.3(13) |
| C38  | 24.7(16) | 25.2(17) | 28.7(18) | -13.7(14) | -2.6(13)  | -2.0(13) |
| C39  | 29.5(18) | 28.4(18) | 46(2)    | -24.6(17) | -11.9(16) | 2.5(14)  |
| C40  | 31.7(18) | 32.1(18) | 31.2(19) | -20.8(16) | -8.8(15)  | 1.6(14)  |
| C41  | 24.1(16) | 25.7(17) | 33.4(19) | -15.8(15) | -9.2(14)  | 2.5(13)  |
| C42  | 28.8(17) | 23.6(17) | 39(2)    | -18.5(15) | -5.0(15)  | -1.2(13) |
| C43  | 32.9(19) | 23.2(17) | 44(2)    | -19.7(16) | -7.0(16)  | -0.7(14) |
| C44  | 27.2(17) | 25.9(17) | 31.9(19) | -15.5(15) | -2.5(14)  | -1.1(13) |
| C45  | 33.7(19) | 33.3(19) | 41(2)    | -18.7(17) | -10.9(16) | 3.0(15)  |
| C46  | 60(3)    | 43(3)    | 49(3)    | -15(2)    | -23(2)    | -2(2)    |
| C47  | 36(2)    | 46(2)    | 46(2)    | -27(2)    | -11.6(18) | 5.2(18)  |
| C48  | 36.6(19) | 19.7(16) | 34.7(19) | -12.0(15) | -6.8(15)  | -2.8(14) |

**Table S15 Anisotropic Displacement Parameters ( $\text{\AA}^2 \times 10^3$ ) for HPQ4. The Anisotropic displacement factor exponent takes the form:  $-2\pi^2[h^2a^*2U_{11}+2hka^*b^*U_{12}+\dots]$ .**

| Atom | $U_{11}$ | $U_{22}$ | $U_{33}$ | $U_{23}$  | $U_{13}$  | $U_{12}$  |
|------|----------|----------|----------|-----------|-----------|-----------|
| C49  | 38(2)    | 23.3(17) | 47(2)    | -15.1(16) | -14.2(17) | 1.1(15)   |
| C50  | 41(2)    | 27.9(19) | 67(3)    | -26(2)    | -18(2)    | 6.1(16)   |
| C51  | 46(2)    | 32(2)    | 67(3)    | -31(2)    | -14(2)    | 0.3(18)   |
| C52  | 45(2)    | 35(2)    | 66(3)    | -29(2)    | -23(2)    | 0.9(18)   |
| C53  | 38(2)    | 27.3(19) | 55(3)    | -20.4(18) | -14.1(18) | 3.0(16)   |
| C54  | 65(3)    | 59(3)    | 122(5)   | -64(4)    | -38(4)    | 11(3)     |
| Cl2  | 93.6(10) | 36.6(5)  | 51.4(7)  | -17.2(5)  | -15.9(6)  | -21.1(6)  |
| O2   | 67(2)    | 28.9(14) | 27.8(14) | -8.6(11)  | -6.0(13)  | -10.9(13) |
| O3   | 42.4(15) | 28.2(13) | 29.2(13) | -7.4(11)  | -8.0(11)  | -3.1(11)  |
| N1   | 61(3)    | 35(2)    | 70(3)    | -23(2)    | -14(2)    | -2.9(18)  |
| N2   | 178(7)   | 104(5)   | 76(4)    | -65(4)    | 32(4)     | -36(5)    |
| N5   | 38.2(17) | 20.7(14) | 25.5(15) | -7.9(12)  | -1.1(13)  | -2.2(12)  |
| N6   | 37.8(17) | 23.6(15) | 30.4(16) | -11.7(13) | -4.3(13)  | 1.1(12)   |
| C1   | 36(2)    | 32.1(19) | 36(2)    | -18.7(17) | -8.9(16)  | 4.0(15)   |
| C2   | 39(2)    | 32.9(19) | 34(2)    | -15.8(16) | -6.3(16)  | 0.3(16)   |
| C3   | 31.5(18) | 28.2(18) | 31.3(19) | -12.6(15) | -8.0(15)  | 1.8(14)   |
| C4   | 49(2)    | 38(2)    | 48(3)    | -25(2)    | -4(2)     | -0.5(18)  |
| C5   | 94(4)    | 60(3)    | 56(3)    | -41(3)    | 11(3)     | -18(3)    |
| C6   | 51(3)    | 37(2)    | 57(3)    | -29(2)    | -11(2)    | 2.2(19)   |
| C7   | 31.6(18) | 25.6(17) | 31.5(19) | -12.0(15) | -5.4(15)  | -3.3(14)  |
| C8   | 37.0(17) | 41.5(18) | 48(2)    | -23.5(16) | -8.9(15)  | 8.1(15)   |
| C9   | 39.4(18) | 43.8(18) | 54(2)    | -24.4(16) | -7.8(15)  | 10.0(15)  |
| C10  | 44(2)    | 48(2)    | 45(2)    | -28(2)    | -1.1(19)  | -4.4(19)  |
| C11  | 45.3(19) | 39.1(18) | 41.8(18) | -14.4(15) | -10.4(15) | 2.2(15)   |
| C12  | 43.4(18) | 36.4(17) | 37.8(17) | -16.7(15) | -7.7(15)  | 4.6(14)   |
| C13  | 79(4)    | 73(3)    | 46(3)    | -36(3)    | 4(2)      | 3(3)      |
| C14  | 27.0(17) | 25.9(17) | 31.9(19) | -12.1(15) | -6.2(14)  | 1.5(14)   |
| C15  | 27.7(18) | 33.6(19) | 33.5(19) | -16.2(16) | -10.4(15) | 4.1(15)   |
| C16  | 30.3(18) | 35.9(19) | 28.9(18) | -13.0(16) | -9.9(15)  | 1.3(15)   |
| C17  | 25.4(17) | 28.3(18) | 37(2)    | -11.2(16) | -8.7(15)  | 2.6(14)   |
| C18  | 28.9(17) | 27.3(17) | 27.3(18) | -11.6(14) | -6.3(14)  | 2.8(14)   |
| C19  | 29.2(18) | 27.4(17) | 26.6(18) | -9.9(14)  | -3.9(14)  | 2.7(14)   |
| C20  | 31.5(18) | 25.1(17) | 29.1(18) | -10.7(15) | -7.1(14)  | 6.2(14)   |
| C21  | 38(2)    | 24.6(17) | 29.2(19) | -10.1(15) | -3.3(15)  | 0.3(15)   |
| C22  | 34.3(19) | 23.7(17) | 39(2)    | -13.1(16) | -5.1(16)  | 1.3(14)   |
| C23  | 36.9(19) | 25.6(17) | 27.4(18) | -13.1(15) | -2.5(15)  | 3.2(14)   |
| C24  | 57(3)    | 26.7(19) | 33(2)    | -12.1(16) | -4.9(18)  | -1.1(17)  |
| C25  | 60(3)    | 24.4(18) | 33(2)    | -9.3(16)  | -5.1(19)  | -5.9(18)  |
| C26  | 49(2)    | 29.6(19) | 39(2)    | -17.4(17) | -4.6(18)  | -3.5(17)  |
| C27  | 42(2)    | 26.9(18) | 29.8(19) | -10.3(15) | -3.0(16)  | -2.4(15)  |
| F2   | 298(12)  | 81(4)    | 62(3)    | -39(3)    | 81(5)     | -64(5)    |
| F1   | 101(5)   | 297(11)  | 105(5)   | -135(6)   | -16(4)    | 79(6)     |
| F3   | 80(4)    | 75(4)    | 46(3)    | -34(3)    | 4(3)      | 3(3)      |
| F03{ | 148(6)   | 184(7)   | 71(3)    | -86(4)    | 5(3)      | -67(5)    |

**Table S15 Anisotropic Displacement Parameters ( $\text{\AA}^2 \times 10^3$ ) for HPQ4. The Anisotropic displacement factor exponent takes the form:  $-2\pi^2[h^2a^*2U_{11}+2hka^*b^*U_{12}+\dots]$ .**

| Atom | $U_{11}$ | $U_{22}$ | $U_{33}$ | $U_{23}$  | $U_{13}$  | $U_{12}$  |
|------|----------|----------|----------|-----------|-----------|-----------|
| F04C | 75(5)    | 75(5)    | 45(4)    | -27(4)    | 13(4)     | 3(4)      |
| F14  | 81(5)    | 72(5)    | 43(4)    | -39(4)    | 6(4)      | 6(4)      |
| Cl3  | 48.1(5)  | 21.1(4)  | 57.0(6)  | -20.2(4)  | -21.3(5)  | 3.0(4)    |
| F10  | 107(3)   | 29.1(13) | 54.4(17) | -15.0(12) | 21.6(16)  | -26.4(15) |
| F11  | 127(3)   | 34.7(14) | 62.3(18) | -26.4(13) | -35.4(18) | -4.4(16)  |
| F12  | 89(2)    | 23.7(12) | 86(2)    | -18.2(13) | -20.0(18) | 9.9(13)   |
| O6   | 60.1(18) | 20.6(12) | 19.7(13) | -5.1(10)  | -5.9(11)  | -5.2(11)  |
| O8   | 38.8(14) | 20.9(11) | 26.9(13) | -11.3(10) | -4.4(10)  | -0.3(10)  |
| N11  | 28.6(14) | 20.5(13) | 23.9(14) | -11.9(11) | -5.2(11)  | -0.1(11)  |
| N12  | 44.1(18) | 16.7(13) | 24.4(15) | -9.2(12)  | -9.4(13)  | -0.5(12)  |
| N15  | 43.1(18) | 23.4(16) | 35.7(17) | -11.7(13) | -8.7(14)  | -2.4(13)  |
| N16  | 66(2)    | 27.3(16) | 33.0(18) | -10.8(15) | -10.4(17) | 9.9(16)   |
| C82  | 31.6(18) | 22.6(17) | 36(2)    | -12.3(15) | -11.2(15) | -1.0(14)  |
| C83  | 27.0(17) | 23.0(17) | 44(2)    | -16.5(16) | -12.3(15) | 0.6(13)   |
| C84  | 30.4(18) | 28.7(18) | 38(2)    | -23.1(16) | -9.2(15)  | 3.5(14)   |
| C85  | 28.1(17) | 27.0(17) | 27.7(18) | -15.4(15) | -3.2(14)  | 0.7(13)   |
| C86  | 22.1(15) | 20.2(15) | 26.7(17) | -10.6(13) | -3.3(13)  | -0.6(12)  |
| C87  | 30.5(17) | 20.5(16) | 27.4(17) | -10.3(14) | -8.7(14)  | -1.9(13)  |
| C88  | 34.7(19) | 19.5(16) | 31.7(19) | -10.4(14) | -8.9(15)  | -1.7(14)  |
| C89  | 25.3(16) | 17.7(15) | 26.0(17) | -7.3(13)  | -6.5(13)  | -1.3(12)  |
| C90  | 29.3(17) | 17.7(15) | 24.8(17) | -8.2(13)  | -8.4(13)  | 0.0(13)   |
| C91  | 27.6(17) | 21.9(16) | 22.2(16) | -10.7(13) | -3.8(13)  | -0.2(13)  |
| C92  | 32.1(18) | 20.5(16) | 25.7(17) | -6.4(14)  | -4.0(14)  | -0.1(13)  |
| C93  | 37.8(19) | 18.2(15) | 25.9(17) | -8.1(13)  | -7.0(14)  | 0.0(14)   |
| C94  | 37.5(19) | 20.1(16) | 22.2(17) | -8.3(13)  | -8.5(14)  | 1.9(14)   |
| C95  | 36.2(19) | 18.6(15) | 21.1(16) | -8.2(13)  | -5.4(14)  | 1.2(13)   |
| C96  | 38.6(19) | 17.6(15) | 22.4(17) | -7.7(13)  | -4.5(14)  | 1.3(13)   |
| C97  | 40(2)    | 17.4(15) | 28.1(18) | -10.9(14) | -7.8(15)  | 1.7(14)   |
| C98  | 34.3(18) | 18.6(15) | 22.7(16) | -8.5(13)  | -7.9(14)  | 1.9(13)   |
| C99  | 32.6(18) | 21.4(16) | 24.1(17) | -10.9(13) | -8.2(14)  | 0.8(13)   |
| C100 | 33.7(18) | 22.9(18) | 26.4(17) | -10.1(14) | -8.1(14)  | -1.9(14)  |
| C101 | 41(2)    | 19.1(16) | 25.5(18) | -6.7(14)  | -7.8(15)  | 0.1(14)   |
| C102 | 37.6(19) | 17.1(15) | 22.4(16) | -8.4(13)  | -3.9(14)  | -0.2(13)  |
| C103 | 37(2)    | 25.1(18) | 41(2)    | -15.2(16) | -6.2(17)  | 1.0(15)   |
| C104 | 47(2)    | 28.9(19) | 33(2)    | -11.4(16) | 0.8(17)   | -9.7(17)  |
| C105 | 55(2)    | 19.0(17) | 21.8(17) | -7.1(14)  | -3.8(16)  | -0.5(16)  |
| C106 | 46(2)    | 22.9(17) | 29.9(19) | -9.2(15)  | -4.3(16)  | 6.8(16)   |
| C107 | 35.7(19) | 23.1(17) | 28.6(18) | -7.9(14)  | -4.6(15)  | 0.4(14)   |
| C108 | 73(3)    | 23.6(19) | 40(2)    | -14.6(17) | -12(2)    | -2.7(19)  |
| Cl4  | 49.8(6)  | 27.3(4)  | 50.4(6)  | -15.6(4)  | -14.7(5)  | -6.4(4)   |
| O5   | 43.1(15) | 26.9(13) | 27.3(13) | -10.7(10) | -15.6(11) | 0.1(11)   |
| O7   | 62.0(18) | 23.5(12) | 26.8(14) | -8.3(11)  | -17.0(12) | -2.0(12)  |
| N9   | 42.7(19) | 38.8(18) | 33.6(17) | -16.8(15) | -2.3(14)  | -11.7(15) |
| N10  | 43.4(18) | 27.2(16) | 35.0(17) | -15.5(14) | -10.2(14) | 0.0(13)   |

**Table S15 Anisotropic Displacement Parameters ( $\text{\AA}^2 \times 10^3$ ) for HPQ4. The Anisotropic displacement factor exponent takes the form:  $-2\pi^2[h^2a^*2U_{11}+2hka^*b^*U_{12}+\dots]$ .**

| Atom | $U_{11}$ | $U_{22}$ | $U_{33}$ | $U_{23}$  | $U_{13}$  | $U_{12}$ |
|------|----------|----------|----------|-----------|-----------|----------|
| N13  | 39.9(17) | 20.4(14) | 24.0(14) | -9.7(12)  | -13.3(12) | 1.1(12)  |
| N14  | 28.2(14) | 26.3(14) | 22.1(14) | -11.1(12) | -7.2(11)  | 2.2(11)  |
| C55  | 182(5)   | 36.8(19) | 74(2)    | -8.9(19)  | -32(3)    | -35(2)   |
| C56  | 88(4)    | 29(2)    | 36(2)    | -9.9(18)  | -12(2)    | -12(2)   |
| C57  | 117(5)   | 30(2)    | 47(3)    | -20(2)    | 3(3)      | -3(3)    |
| C58  | 95(4)    | 31(2)    | 34(2)    | -14.4(19) | 11(2)     | -6(2)    |
| C60  | 49(2)    | 36(2)    | 36(2)    | -17.5(18) | -5.8(18)  | -7.5(18) |
| C61  | 60(3)    | 40(2)    | 39(2)    | -13.4(19) | 0(2)      | -18(2)   |
| C62  | 37.6(19) | 28.3(18) | 25.9(18) | -13.9(15) | -3.0(15)  | -3.0(15) |
| C63  | 35.8(19) | 26.2(17) | 25.9(17) | -14.2(14) | -4.6(14)  | -4.5(14) |
| C64  | 34.6(19) | 28.6(18) | 30.1(19) | -15.2(15) | -3.5(15)  | -4.4(15) |
| C65  | 34.4(19) | 32.8(19) | 21.4(16) | -15.2(15) | -7.2(14)  | 1.3(15)  |
| C66  | 43(2)    | 25.7(17) | 24.7(18) | -12.5(14) | -4.8(15)  | -5.3(15) |
| C67  | 45(2)    | 26.4(18) | 29.6(19) | -13.2(15) | -5.6(16)  | -6.1(16) |
| C68  | 43(2)    | 25.5(17) | 29.5(19) | -9.8(15)  | -12.6(16) | -4.5(15) |
| C69  | 40(2)    | 26.3(17) | 24.3(18) | -9.1(14)  | -10.2(15) | -1.8(15) |
| C70  | 32.9(18) | 20.5(16) | 23.5(17) | -8.4(13)  | -8.4(14)  | 1.9(13)  |
| C71  | 33.7(18) | 24.9(17) | 29.3(18) | -12.8(14) | -13.1(15) | 4.6(14)  |
| C72  | 43(2)    | 25.6(18) | 30.3(19) | -6.1(15)  | -14.6(16) | 1.0(15)  |
| C73  | 49(2)    | 21.5(17) | 32(2)    | -7.0(15)  | -11.8(17) | -5.0(16) |
| C74  | 27.4(17) | 24.1(16) | 24.6(17) | -10.5(14) | -7.0(13)  | 3.8(13)  |
| C75  | 35.5(19) | 24.3(17) | 24.7(17) | -10.4(14) | -10.6(14) | 4.2(14)  |
| C76  | 26.9(17) | 27.5(17) | 28.0(18) | -15.8(14) | -7.2(14)  | 4.3(13)  |
| C77  | 24.1(16) | 27.3(17) | 23.4(17) | -13.5(14) | -5.6(13)  | 3.7(13)  |
| C78  | 34.6(19) | 23.0(17) | 31.0(19) | -8.5(14)  | -11.4(15) | 1.3(14)  |
| C79  | 31.6(18) | 24.9(17) | 42(2)    | -15.3(16) | -12.6(16) | 1.5(14)  |
| C80  | 31.2(18) | 29.1(18) | 35(2)    | -16.7(16) | -12.6(15) | 1.5(14)  |
| C81  | 25.1(16) | 31.1(18) | 25.6(17) | -13.4(15) | -7.9(14)  | 3.7(14)  |
| F13  | 193(6)   | 43(3)    | 72(3)    | -16(3)    | -37(4)    | -47(3)   |
| F15  | 187(6)   | 32(3)    | 96(4)    | 3(3)      | -34(4)    | -19(3)   |
| F16  | 188(6)   | 45(3)    | 69(3)    | -9(3)     | -2(4)     | -42(4)   |
| C59  | 51(2)    | 25.2(18) | 25.7(18) | -12.1(15) | -8.5(16)  | -4.6(16) |
| F4   | 182(6)   | 50(3)    | 103(4)   | 5(4)      | -26(5)    | -37(4)   |
| F5   | 178(13)  | 45(5)    | 158(11)  | -67(7)    | 55(10)    | -24(7)   |
| F6   | 187(6)   | 41(3)    | 74(4)    | 10(3)     | -42(4)    | -27(4)   |

**Table S16. Bond Lengths for HPQ4.**

| Atom Atom | Length/ $\text{\AA}$ | Atom Atom | Length/ $\text{\AA}$ |
|-----------|----------------------|-----------|----------------------|
| Cl1 C28   | 1.738(3)             | Cl3 C83   | 1.735(3)             |
| F7 C54    | 1.411(8)             | F10 C108  | 1.331(5)             |
| F8 C54    | 1.300(6)             | F11 C108  | 1.338(5)             |
| F9 C54    | 1.295(6)             | F12 C108  | 1.340(6)             |

**Table S16. Bond Lengths for HPQ4.**

| Atom | Atom | Length/Å | Atom | Atom | Length/Å |
|------|------|----------|------|------|----------|
| O1   | C34  | 1.228(4) | O6   | C88  | 1.232(4) |
| O4   | C41  | 1.339(4) | O8   | C91  | 1.340(4) |
| N3   | C34  | 1.377(4) | N11  | C86  | 1.389(4) |
| N3   | C35  | 1.372(4) | N11  | C89  | 1.301(4) |
| N4   | C31  | 1.391(4) | N12  | C88  | 1.377(4) |
| N4   | C35  | 1.307(4) | N12  | C89  | 1.376(4) |
| N7   | C47  | 1.140(5) | N15  | C100 | 1.146(5) |
| N8   | C46  | 1.146(6) | N16  | C101 | 1.140(5) |
| C28  | C29  | 1.391(5) | C82  | C83  | 1.371(5) |
| C28  | C33  | 1.366(5) | C82  | C87  | 1.398(5) |
| C29  | C30  | 1.381(5) | C83  | C84  | 1.403(5) |
| C30  | C31  | 1.400(5) | C84  | C85  | 1.379(5) |
| C31  | C32  | 1.405(5) | C85  | C86  | 1.399(4) |
| C32  | C33  | 1.400(4) | C86  | C87  | 1.406(5) |
| C32  | C34  | 1.455(5) | C87  | C88  | 1.448(5) |
| C35  | C36  | 1.478(4) | C89  | C90  | 1.472(4) |
| C36  | C37  | 1.397(5) | C90  | C91  | 1.411(5) |
| C36  | C41  | 1.419(5) | C90  | C95  | 1.395(5) |
| C37  | C38  | 1.388(4) | C91  | C92  | 1.395(5) |
| C38  | C39  | 1.412(5) | C92  | C93  | 1.378(5) |
| C38  | C42  | 1.458(5) | C93  | C94  | 1.396(5) |
| C39  | C40  | 1.371(5) | C94  | C95  | 1.394(4) |
| C40  | C41  | 1.398(5) | C94  | C96  | 1.457(5) |
| C42  | C43  | 1.342(5) | C96  | C97  | 1.345(5) |
| C43  | C44  | 1.439(5) | C97  | C98  | 1.458(5) |
| C44  | C45  | 1.365(5) | C98  | C99  | 1.359(5) |
| C44  | C48  | 1.485(5) | C98  | C102 | 1.485(4) |
| C45  | C46  | 1.433(6) | C99  | C100 | 1.439(5) |
| C45  | C47  | 1.439(5) | C99  | C101 | 1.442(5) |
| C48  | C49  | 1.397(5) | C102 | C103 | 1.398(5) |
| C48  | C53  | 1.389(5) | C102 | C107 | 1.389(5) |
| C49  | C50  | 1.386(5) | C103 | C104 | 1.386(5) |
| C50  | C51  | 1.383(6) | C104 | C105 | 1.387(6) |
| C51  | C52  | 1.383(6) | C105 | C106 | 1.379(6) |
| C51  | C54  | 1.498(6) | C105 | C108 | 1.495(5) |
| C52  | C53  | 1.380(5) | C106 | C107 | 1.387(5) |
| Cl2  | C26  | 1.734(4) | Cl4  | C79  | 1.732(4) |
| O2   | C21  | 1.230(5) | O5   | C71  | 1.342(4) |
| O3   | C17  | 1.339(4) | O7   | C75  | 1.230(4) |
| N1   | C6   | 1.142(6) | N9   | C64  | 1.139(5) |
| N2   | C5   | 1.136(7) | N10  | C65  | 1.153(5) |
| N5   | C20  | 1.379(5) | N13  | C74  | 1.379(4) |
| N5   | C21  | 1.370(5) | N13  | C75  | 1.374(4) |
| N6   | C20  | 1.305(5) | N14  | C74  | 1.309(4) |
| N6   | C23  | 1.394(5) | N14  | C77  | 1.390(4) |

**Table S16. Bond Lengths for HPQ4.**

| Atom | Atom | Length/Å  | Atom | Atom | Length/Å  |
|------|------|-----------|------|------|-----------|
| C1   | C2   | 1.443(5)  | C55  | C56  | 1.487(7)  |
| C1   | C4   | 1.365(5)  | C55  | F13  | 1.315(10) |
| C1   | C7   | 1.496(5)  | C55  | F15  | 1.375(14) |
| C2   | C3   | 1.348(5)  | C55  | F16  | 1.329(13) |
| C3   | C14  | 1.457(5)  | C55  | F4   | 1.328(15) |
| C4   | C5   | 1.443(7)  | C55  | F5   | 1.271(12) |
| C4   | C6   | 1.445(6)  | C55  | F6   | 1.318(12) |
| C7   | C8   | 1.389(5)  | C56  | C57  | 1.375(7)  |
| C7   | C12  | 1.380(5)  | C56  | C61  | 1.372(7)  |
| C8   | C9   | 1.380(6)  | C57  | C58  | 1.389(6)  |
| C9   | C10  | 1.385(7)  | C58  | C59  | 1.373(6)  |
| C10  | C11  | 1.382(6)  | C60  | C61  | 1.388(6)  |
| C10  | C13  | 1.508(6)  | C60  | C59  | 1.379(6)  |
| C11  | C12  | 1.387(6)  | C62  | C63  | 1.366(5)  |
| C13  | F2   | 1.279(8)  | C62  | C66  | 1.442(5)  |
| C13  | F1   | 1.330(9)  | C62  | C59  | 1.492(5)  |
| C13  | F3   | 1.31(2)   | C63  | C64  | 1.439(5)  |
| C13  | F03{ | 1.298(8)  | C63  | C65  | 1.432(5)  |
| C13  | F04C | 1.27(2)   | C66  | C67  | 1.349(5)  |
| C13  | F14  | 1.280(19) | C67  | C68  | 1.453(5)  |
| C14  | C15  | 1.399(5)  | C68  | C69  | 1.390(5)  |
| C14  | C19  | 1.393(5)  | C68  | C73  | 1.410(5)  |
| C15  | C16  | 1.368(5)  | C69  | C70  | 1.393(5)  |
| C16  | C17  | 1.409(5)  | C70  | C71  | 1.418(5)  |
| C17  | C18  | 1.408(5)  | C70  | C74  | 1.468(5)  |
| C18  | C19  | 1.406(5)  | C71  | C72  | 1.395(5)  |
| C18  | C20  | 1.474(5)  | C72  | C73  | 1.367(5)  |
| C21  | C22  | 1.442(5)  | C75  | C76  | 1.449(5)  |
| C22  | C23  | 1.407(5)  | C76  | C77  | 1.398(5)  |
| C22  | C27  | 1.396(5)  | C76  | C78  | 1.393(5)  |
| C23  | C24  | 1.404(5)  | C77  | C81  | 1.411(4)  |
| C24  | C25  | 1.375(6)  | C78  | C79  | 1.377(5)  |
| C25  | C26  | 1.402(6)  | C79  | C80  | 1.399(5)  |
| C26  | C27  | 1.363(5)  | C80  | C81  | 1.378(5)  |
| F3   | F03{ | 1.25(2)   |      |      |           |

**Table S17. Bond Angles for HPQ4.**

| Atom | Atom | Atom | Angle/°  | Atom | Atom | Atom | Angle/°  |
|------|------|------|----------|------|------|------|----------|
| C35  | N3   | C34  | 124.9(3) | C89  | N11  | C86  | 118.8(3) |
| C35  | N4   | C31  | 118.2(3) | C89  | N12  | C88  | 124.1(3) |
| C29  | C28  | Cl1  | 118.3(3) | C83  | C82  | C87  | 118.4(3) |
| C33  | C28  | Cl1  | 119.9(3) | C82  | C83  | Cl3  | 119.5(3) |
| C33  | C28  | C29  | 121.8(3) | C82  | C83  | C84  | 121.8(3) |

**Table S17. Bond Angles for HPQ4.**

| Atom | Atom | Atom | Angle/°  | Atom | Atom | Atom | Angle/°  |
|------|------|------|----------|------|------|------|----------|
| C30  | C29  | C28  | 119.9(3) | C84  | C83  | Cl3  | 118.7(3) |
| C29  | C30  | C31  | 119.7(3) | C85  | C84  | C83  | 119.7(3) |
| N4   | C31  | C30  | 118.1(3) | C84  | C85  | C86  | 119.9(3) |
| N4   | C31  | C32  | 122.5(3) | N11  | C86  | C85  | 118.9(3) |
| C30  | C31  | C32  | 119.4(3) | N11  | C86  | C87  | 121.9(3) |
| C31  | C32  | C34  | 118.6(3) | C85  | C86  | C87  | 119.3(3) |
| C33  | C32  | C31  | 120.3(3) | C82  | C87  | C86  | 120.9(3) |
| C33  | C32  | C34  | 121.2(3) | C82  | C87  | C88  | 120.4(3) |
| C28  | C33  | C32  | 118.9(3) | C86  | C87  | C88  | 118.7(3) |
| O1   | C34  | N3   | 121.2(3) | O6   | C88  | N12  | 120.3(3) |
| O1   | C34  | C32  | 124.8(3) | O6   | C88  | C87  | 125.1(3) |
| N3   | C34  | C32  | 114.0(3) | N12  | C88  | C87  | 114.6(3) |
| N3   | C35  | C36  | 119.1(3) | N11  | C89  | N12  | 121.9(3) |
| N4   | C35  | N3   | 121.8(3) | N11  | C89  | C90  | 119.9(3) |
| N4   | C35  | C36  | 119.1(3) | N12  | C89  | C90  | 118.2(3) |
| C37  | C36  | C35  | 121.1(3) | C91  | C90  | C89  | 120.5(3) |
| C37  | C36  | C41  | 118.5(3) | C95  | C90  | C89  | 121.2(3) |
| C41  | C36  | C35  | 120.3(3) | C95  | C90  | C91  | 118.3(3) |
| C38  | C37  | C36  | 122.7(3) | O8   | C91  | C90  | 123.0(3) |
| C37  | C38  | C39  | 117.4(3) | O8   | C91  | C92  | 117.5(3) |
| C37  | C38  | C42  | 123.0(3) | C92  | C91  | C90  | 119.5(3) |
| C39  | C38  | C42  | 119.5(3) | C93  | C92  | C91  | 120.7(3) |
| C40  | C39  | C38  | 121.3(3) | C92  | C93  | C94  | 121.3(3) |
| C39  | C40  | C41  | 121.0(3) | C93  | C94  | C96  | 120.4(3) |
| O4   | C41  | C36  | 123.6(3) | C95  | C94  | C93  | 117.7(3) |
| O4   | C41  | C40  | 117.3(3) | C95  | C94  | C96  | 121.9(3) |
| C40  | C41  | C36  | 119.1(3) | C94  | C95  | C90  | 122.5(3) |
| C43  | C42  | C38  | 126.2(3) | C97  | C96  | C94  | 125.9(3) |
| C42  | C43  | C44  | 125.8(3) | C96  | C97  | C98  | 124.7(3) |
| C43  | C44  | C48  | 120.7(3) | C97  | C98  | C102 | 120.2(3) |
| C45  | C44  | C43  | 121.0(3) | C99  | C98  | C97  | 121.0(3) |
| C45  | C44  | C48  | 118.3(3) | C99  | C98  | C102 | 118.8(3) |
| C44  | C45  | C46  | 122.4(4) | C98  | C99  | C100 | 121.4(3) |
| C44  | C45  | C47  | 121.7(4) | C98  | C99  | C101 | 121.9(3) |
| C46  | C45  | C47  | 115.9(4) | C100 | C99  | C101 | 116.7(3) |
| N8   | C46  | C45  | 178.0(6) | N15  | C100 | C99  | 177.4(4) |
| N7   | C47  | C45  | 178.4(5) | N16  | C101 | C99  | 177.2(4) |
| C49  | C48  | C44  | 119.2(3) | C103 | C102 | C98  | 119.4(3) |
| C53  | C48  | C44  | 121.2(3) | C107 | C102 | C98  | 120.8(3) |
| C53  | C48  | C49  | 119.6(3) | C107 | C102 | C103 | 119.7(3) |
| C50  | C49  | C48  | 120.1(4) | C104 | C103 | C102 | 119.7(4) |
| C51  | C50  | C49  | 119.6(4) | C103 | C104 | C105 | 119.7(4) |
| C50  | C51  | C52  | 120.4(4) | C104 | C105 | C108 | 118.2(4) |
| C50  | C51  | C54  | 119.7(4) | C106 | C105 | C104 | 121.0(3) |
| C52  | C51  | C54  | 119.7(4) | C106 | C105 | C108 | 120.7(4) |

**Table S17. Bond Angles for HPQ4.**

| Atom | Atom | Atom | Angle/°   | Atom | Atom | Atom | Angle/°   |
|------|------|------|-----------|------|------|------|-----------|
| C53  | C52  | C51  | 120.2(4)  | C105 | C106 | C107 | 119.3(4)  |
| C52  | C53  | C48  | 120.0(4)  | C106 | C107 | C102 | 120.5(4)  |
| F7   | C54  | C51  | 111.0(5)  | F10  | C108 | F11  | 106.9(4)  |
| F8   | C54  | F7   | 101.8(5)  | F10  | C108 | F12  | 106.2(4)  |
| F8   | C54  | C51  | 113.6(5)  | F10  | C108 | C105 | 113.1(3)  |
| F9   | C54  | F7   | 101.1(5)  | F11  | C108 | F12  | 104.7(4)  |
| F9   | C54  | F8   | 113.2(5)  | F11  | C108 | C105 | 112.2(3)  |
| F9   | C54  | C51  | 114.5(5)  | F12  | C108 | C105 | 113.1(4)  |
| C21  | N5   | C20  | 123.5(3)  | C75  | N13  | C74  | 123.8(3)  |
| C20  | N6   | C23  | 118.5(3)  | C74  | N14  | C77  | 118.4(3)  |
| C2   | C1   | C7   | 119.3(3)  | F13  | C55  | C56  | 110.7(6)  |
| C4   | C1   | C2   | 121.5(4)  | F13  | C55  | F15  | 106.0(9)  |
| C4   | C1   | C7   | 119.1(4)  | F13  | C55  | F16  | 102.7(10) |
| C3   | C2   | C1   | 123.1(4)  | F15  | C55  | C56  | 111.0(8)  |
| C2   | C3   | C14  | 126.3(4)  | F16  | C55  | C56  | 114.1(7)  |
| C1   | C4   | C5   | 121.0(4)  | F16  | C55  | F15  | 111.9(8)  |
| C1   | C4   | C6   | 122.0(4)  | F4   | C55  | C56  | 114.3(9)  |
| C6   | C4   | C5   | 116.9(4)  | F5   | C55  | C56  | 118.3(8)  |
| N2   | C5   | C4   | 178.3(6)  | F5   | C55  | F4   | 103.2(10) |
| N1   | C6   | C4   | 178.3(5)  | F5   | C55  | F6   | 106.5(12) |
| C8   | C7   | C1   | 118.2(3)  | F6   | C55  | C56  | 112.8(6)  |
| C12  | C7   | C1   | 122.1(3)  | F6   | C55  | F4   | 99.7(10)  |
| C12  | C7   | C8   | 119.6(4)  | C57  | C56  | C55  | 118.5(5)  |
| C9   | C8   | C7   | 120.2(4)  | C61  | C56  | C55  | 120.9(5)  |
| C8   | C9   | C10  | 119.8(4)  | C61  | C56  | C57  | 120.6(4)  |
| C9   | C10  | C13  | 120.2(4)  | C56  | C57  | C58  | 119.6(4)  |
| C11  | C10  | C9   | 120.3(4)  | C59  | C58  | C57  | 120.3(4)  |
| C11  | C10  | C13  | 119.5(5)  | C59  | C60  | C61  | 120.2(4)  |
| C10  | C11  | C12  | 119.6(4)  | C56  | C61  | C60  | 119.6(4)  |
| C7   | C12  | C11  | 120.4(4)  | C63  | C62  | C66  | 121.7(3)  |
| F2   | C13  | C10  | 114.7(5)  | C63  | C62  | C59  | 118.9(3)  |
| F1   | C13  | C10  | 112.9(5)  | C66  | C62  | C59  | 119.4(3)  |
| F3   | C13  | C10  | 109.1(9)  | C62  | C63  | C64  | 121.2(3)  |
| F3   | C13  | F1   | 138.0(9)  | C62  | C63  | C65  | 122.1(3)  |
| F03{ | C13  | C10  | 112.7(5)  | C65  | C63  | C64  | 116.7(3)  |
| F03{ | C13  | F1   | 103.4(6)  | N9   | C64  | C63  | 178.7(4)  |
| F03{ | C13  | F3   | 57.2(10)  | N10  | C65  | C63  | 178.9(4)  |
| F04C | C13  | C10  | 109.5(10) | C67  | C66  | C62  | 123.8(3)  |
| F04C | C13  | F14  | 107.7(16) | C66  | C67  | C68  | 126.9(3)  |
| F14  | C13  | C10  | 109.2(9)  | C69  | C68  | C67  | 122.1(3)  |
| C15  | C14  | C3   | 123.3(3)  | C69  | C68  | C73  | 118.2(3)  |
| C19  | C14  | C3   | 118.6(3)  | C73  | C68  | C67  | 119.6(3)  |
| C19  | C14  | C15  | 118.1(3)  | C68  | C69  | C70  | 121.9(3)  |
| C16  | C15  | C14  | 121.6(3)  | C69  | C70  | C71  | 118.6(3)  |
| C15  | C16  | C17  | 120.1(3)  | C69  | C70  | C74  | 121.5(3)  |



**Table S17. Bond Angles for HPQ4.**

| Atom | Atom | Atom | Angle/°  | Atom | Atom | Atom | Angle/°  |
|------|------|------|----------|------|------|------|----------|
| O3   | C17  | C16  | 116.4(3) | C71  | C70  | C74  | 119.9(3) |
| O3   | C17  | C18  | 123.8(3) | O5   | C71  | C70  | 122.9(3) |
| C18  | C17  | C16  | 119.8(3) | O5   | C71  | C72  | 117.7(3) |
| C17  | C18  | C20  | 119.9(3) | C72  | C71  | C70  | 119.4(3) |
| C19  | C18  | C17  | 118.1(3) | C73  | C72  | C71  | 120.9(3) |
| C19  | C18  | C20  | 121.9(3) | C72  | C73  | C68  | 120.9(3) |
| C14  | C19  | C18  | 122.0(3) | N13  | C74  | C70  | 118.2(3) |
| N5   | C20  | C18  | 119.4(3) | N14  | C74  | N13  | 121.9(3) |
| N6   | C20  | N5   | 122.2(3) | N14  | C74  | C70  | 119.9(3) |
| N6   | C20  | C18  | 118.3(3) | O7   | C75  | N13  | 120.7(3) |
| O2   | C21  | N5   | 121.3(3) | O7   | C75  | C76  | 124.3(3) |
| O2   | C21  | C22  | 123.4(3) | N13  | C75  | C76  | 115.0(3) |
| N5   | C21  | C22  | 115.3(3) | C77  | C76  | C75  | 118.6(3) |
| C23  | C22  | C21  | 118.8(3) | C78  | C76  | C75  | 120.3(3) |
| C27  | C22  | C21  | 120.3(4) | C78  | C76  | C77  | 121.1(3) |
| C27  | C22  | C23  | 120.9(3) | N14  | C77  | C76  | 122.2(3) |
| N6   | C23  | C22  | 121.5(3) | N14  | C77  | C81  | 118.6(3) |
| N6   | C23  | C24  | 119.2(3) | C76  | C77  | C81  | 119.1(3) |
| C24  | C23  | C22  | 119.2(3) | C79  | C78  | C76  | 118.9(3) |
| C25  | C24  | C23  | 119.5(4) | C78  | C79  | Cl4  | 119.3(3) |
| C24  | C25  | C26  | 120.2(4) | C78  | C79  | C80  | 120.9(3) |
| C25  | C26  | Cl2  | 119.0(3) | C80  | C79  | Cl4  | 119.8(3) |
| C27  | C26  | Cl2  | 119.3(3) | C81  | C80  | C79  | 120.4(3) |
| C27  | C26  | C25  | 121.7(4) | C80  | C81  | C77  | 119.5(3) |
| C26  | C27  | C22  | 118.5(4) | C58  | C59  | C60  | 119.7(4) |
| F03{ | F3   | C13  | 60.7(11) | C58  | C59  | C62  | 118.9(4) |
| F3   | F03{ | C13  | 62.1(10) | C60  | C59  | C62  | 121.3(3) |

**Table S18. Torsion Angles for HPQ4.**

| A   | B   | C   | D   | Angle/°   | A   | B   | C    | D    | Angle/°   |
|-----|-----|-----|-----|-----------|-----|-----|------|------|-----------|
| Cl1 | C28 | C29 | C30 | 177.9(3)  | F1  | C13 | F3   | F03{ | -72.3(18) |
| Cl1 | C28 | C33 | C32 | -177.3(3) | F1  | C13 | F03{ | F3   | 139.1(11) |
| N3  | C35 | C36 | C37 | 6.5(5)    | Cl3 | C83 | C84  | C85  | 177.0(3)  |
| N3  | C35 | C36 | C41 | -177.4(3) | O8  | C91 | C92  | C93  | 177.8(3)  |
| N4  | C31 | C32 | C33 | 178.9(3)  | N11 | C86 | C87  | C82  | 177.2(3)  |
| N4  | C31 | C32 | C34 | -0.1(5)   | N11 | C86 | C87  | C88  | -2.8(5)   |
| N4  | C35 | C36 | C37 | -172.7(3) | N11 | C89 | C90  | C91  | -7.1(5)   |
| N4  | C35 | C36 | C41 | 3.5(5)    | N11 | C89 | C90  | C95  | 172.2(3)  |
| C28 | C29 | C30 | C31 | -0.6(6)   | N12 | C89 | C90  | C91  | 175.0(3)  |
| C29 | C28 | C33 | C32 | 2.3(6)    | N12 | C89 | C90  | C95  | -5.7(5)   |
| C29 | C30 | C31 | N4  | -178.3(3) | C82 | C83 | C84  | C85  | -1.2(5)   |
| C29 | C30 | C31 | C32 | 2.3(5)    | C82 | C87 | C88  | O6   | 0.1(6)    |
| C30 | C31 | C32 | C33 | -1.7(5)   | C82 | C87 | C88  | N12  | -179.6(3) |

**Table S18. Torsion Angles for HPQ4.**

| A   | B   | C   | D   | Angle/°   | A    | B    | C    | D    | Angle/°   |
|-----|-----|-----|-----|-----------|------|------|------|------|-----------|
| C30 | C31 | C32 | C34 | 179.2(3)  | C83  | C82  | C87  | C86  | 1.1(5)    |
| C31 | N4  | C35 | N3  | -1.6(5)   | C83  | C82  | C87  | C88  | -178.9(3) |
| C31 | N4  | C35 | C36 | 177.6(3)  | C83  | C84  | C85  | C86  | 1.0(5)    |
| C31 | C32 | C33 | C28 | -0.6(5)   | C84  | C85  | C86  | N11  | -178.3(3) |
| C31 | C32 | C34 | O1  | -177.5(3) | C84  | C85  | C86  | C87  | 0.2(5)    |
| C31 | C32 | C34 | N3  | 2.6(5)    | C85  | C86  | C87  | C82  | -1.2(5)   |
| C33 | C28 | C29 | C30 | -1.7(6)   | C85  | C86  | C87  | C88  | 178.7(3)  |
| C33 | C32 | C34 | O1  | 3.5(6)    | C86  | N11  | C89  | N12  | 0.7(5)    |
| C33 | C32 | C34 | N3  | -176.4(3) | C86  | N11  | C89  | C90  | -177.1(3) |
| C34 | N3  | C35 | N4  | 4.6(5)    | C86  | C87  | C88  | O6   | -179.8(3) |
| C34 | N3  | C35 | C36 | -174.6(3) | C86  | C87  | C88  | N12  | 0.5(5)    |
| C34 | C32 | C33 | C28 | 178.5(3)  | C87  | C82  | C83  | Cl3  | -178.0(3) |
| C35 | N3  | C34 | O1  | 175.2(3)  | C87  | C82  | C83  | C84  | 0.2(5)    |
| C35 | N3  | C34 | C32 | -4.9(5)   | C88  | N12  | C89  | N11  | -3.3(5)   |
| C35 | N4  | C31 | C30 | -179.9(3) | C88  | N12  | C89  | C90  | 174.6(3)  |
| C35 | N4  | C31 | C32 | -0.5(5)   | C89  | N11  | C86  | C85  | -179.2(3) |
| C35 | C36 | C37 | C38 | 178.0(3)  | C89  | N11  | C86  | C87  | 2.3(5)    |
| C35 | C36 | C41 | O4  | 0.9(5)    | C89  | N12  | C88  | O6   | -177.2(3) |
| C35 | C36 | C41 | C40 | -178.8(3) | C89  | N12  | C88  | C87  | 2.5(5)    |
| C36 | C37 | C38 | C39 | 0.4(5)    | C89  | C90  | C91  | O8   | 2.8(5)    |
| C36 | C37 | C38 | C42 | -177.6(3) | C89  | C90  | C91  | C92  | -178.5(3) |
| C37 | C36 | C41 | O4  | 177.1(3)  | C89  | C90  | C95  | C94  | 178.9(3)  |
| C37 | C36 | C41 | C40 | -2.6(5)   | C90  | C91  | C92  | C93  | -1.0(5)   |
| C37 | C38 | C39 | C40 | -2.0(5)   | C91  | C90  | C95  | C94  | -1.8(5)   |
| C37 | C38 | C42 | C43 | 5.3(6)    | C91  | C92  | C93  | C94  | -0.6(6)   |
| C38 | C39 | C40 | C41 | 1.2(5)    | C92  | C93  | C94  | C95  | 1.0(5)    |
| C38 | C42 | C43 | C44 | -178.4(3) | C92  | C93  | C94  | C96  | -177.4(3) |
| C39 | C38 | C42 | C43 | -172.7(4) | C93  | C94  | C95  | C90  | 0.2(5)    |
| C39 | C40 | C41 | O4  | -178.6(3) | C93  | C94  | C96  | C97  | 177.9(4)  |
| C39 | C40 | C41 | C36 | 1.1(5)    | C94  | C96  | C97  | C98  | -172.9(3) |
| C41 | C36 | C37 | C38 | 1.8(5)    | C95  | C90  | C91  | O8   | -176.6(3) |
| C42 | C38 | C39 | C40 | 176.1(3)  | C95  | C90  | C91  | C92  | 2.1(5)    |
| C42 | C43 | C44 | C45 | -175.9(4) | C95  | C94  | C96  | C97  | -0.4(6)   |
| C42 | C43 | C44 | C48 | 4.2(6)    | C96  | C94  | C95  | C90  | 178.6(3)  |
| C43 | C44 | C45 | C46 | -170.6(4) | C96  | C97  | C98  | C99  | 166.3(4)  |
| C43 | C44 | C45 | C47 | 9.7(6)    | C96  | C97  | C98  | C102 | -14.5(6)  |
| C43 | C44 | C48 | C49 | -125.2(4) | C97  | C98  | C99  | C100 | 3.2(5)    |
| C43 | C44 | C48 | C53 | 55.2(5)   | C97  | C98  | C99  | C101 | -175.1(3) |
| C44 | C48 | C49 | C50 | 177.9(4)  | C97  | C98  | C102 | C103 | -62.2(5)  |
| C44 | C48 | C53 | C52 | -178.2(4) | C97  | C98  | C102 | C107 | 121.9(4)  |
| C45 | C44 | C48 | C49 | 54.9(5)   | C98  | C102 | C103 | C104 | -174.3(3) |
| C45 | C44 | C48 | C53 | -124.7(4) | C98  | C102 | C107 | C106 | 174.7(3)  |
| C48 | C44 | C45 | C46 | 9.3(6)    | C99  | C98  | C102 | C103 | 117.1(4)  |
| C48 | C44 | C45 | C47 | -170.4(4) | C99  | C98  | C102 | C107 | -58.9(5)  |
| C48 | C49 | C50 | C51 | 0.9(7)    | C102 | C98  | C99  | C100 | -176.0(3) |

**Table S18. Torsion Angles for HPQ4.**

| A   | B   | C   | D   | Angle/°   | A    | B    | C    | D    | Angle/°   |
|-----|-----|-----|-----|-----------|------|------|------|------|-----------|
| C49 | C48 | C53 | C52 | 2.2(6)    | C102 | C98  | C99  | C101 | 5.7(5)    |
| C49 | C50 | C51 | C52 | 0.8(7)    | C102 | C103 | C104 | C105 | -0.8(6)   |
| C49 | C50 | C51 | C54 | -175.1(5) | C103 | C102 | C107 | C106 | -1.2(5)   |
| C50 | C51 | C52 | C53 | -1.0(7)   | C103 | C104 | C105 | C106 | -0.7(6)   |
| C50 | C51 | C54 | F7  | 88.8(6)   | C103 | C104 | C105 | C108 | 178.9(4)  |
| C50 | C51 | C54 | F8  | -157.1(5) | C104 | C105 | C106 | C107 | 1.3(6)    |
| C50 | C51 | C54 | F9  | -24.9(8)  | C104 | C105 | C108 | F10  | 48.8(5)   |
| C51 | C52 | C53 | C48 | -0.5(7)   | C104 | C105 | C108 | F11  | -72.2(5)  |
| C52 | C51 | C54 | F7  | -87.1(6)  | C104 | C105 | C108 | F12  | 169.7(4)  |
| C52 | C51 | C54 | F8  | 27.0(8)   | C105 | C106 | C107 | C102 | -0.3(6)   |
| C52 | C51 | C54 | F9  | 159.2(5)  | C106 | C105 | C108 | F10  | -131.5(4) |
| C53 | C48 | C49 | C50 | -2.4(6)   | C106 | C105 | C108 | F11  | 107.5(5)  |
| C54 | C51 | C52 | C53 | 174.9(5)  | C106 | C105 | C108 | F12  | -10.6(5)  |
| C12 | C26 | C27 | C22 | -179.2(3) | C107 | C102 | C103 | C104 | 1.8(6)    |
| O2  | C21 | C22 | C23 | -175.8(4) | C108 | C105 | C106 | C107 | -178.4(3) |
| O2  | C21 | C22 | C27 | 2.7(6)    | C14  | C79  | C80  | C81  | 179.6(3)  |
| O3  | C17 | C18 | C19 | 176.0(3)  | O5   | C71  | C72  | C73  | 178.0(4)  |
| O3  | C17 | C18 | C20 | -6.2(5)   | O7   | C75  | C76  | C77  | 179.6(3)  |
| N5  | C21 | C22 | C23 | 4.2(5)    | O7   | C75  | C76  | C78  | 0.7(6)    |
| N5  | C21 | C22 | C27 | -177.3(3) | N13  | C75  | C76  | C77  | -1.4(5)   |
| N6  | C23 | C24 | C25 | -178.5(4) | N13  | C75  | C76  | C78  | 179.7(3)  |
| C1  | C2  | C3  | C14 | -179.0(4) | N14  | C77  | C81  | C80  | -179.6(3) |
| C1  | C7  | C8  | C9  | 178.8(4)  | C55  | C56  | C57  | C58  | -179.7(6) |
| C1  | C7  | C12 | C11 | -179.9(4) | C55  | C56  | C61  | C60  | 179.3(6)  |
| C2  | C1  | C4  | C5  | -1.0(7)   | C56  | C57  | C58  | C59  | 0.2(9)    |
| C2  | C1  | C4  | C6  | 179.5(4)  | C57  | C56  | C61  | C60  | -0.3(8)   |
| C2  | C1  | C7  | C8  | 60.5(5)   | C57  | C58  | C59  | C60  | 0.2(8)    |
| C2  | C1  | C7  | C12 | -119.6(4) | C57  | C58  | C59  | C62  | -179.5(5) |
| C2  | C3  | C14 | C15 | 4.9(6)    | C61  | C56  | C57  | C58  | -0.1(9)   |
| C2  | C3  | C14 | C19 | -175.6(4) | C61  | C60  | C59  | C58  | -0.6(7)   |
| C3  | C14 | C15 | C16 | 176.9(3)  | C61  | C60  | C59  | C62  | 179.1(4)  |
| C3  | C14 | C19 | C18 | -177.7(3) | C62  | C66  | C67  | C68  | 179.6(4)  |
| C4  | C1  | C2  | C3  | -167.7(4) | C63  | C62  | C66  | C67  | 179.6(4)  |
| C4  | C1  | C7  | C8  | -117.9(4) | C63  | C62  | C59  | C58  | 70.8(6)   |
| C4  | C1  | C7  | C12 | 62.0(5)   | C63  | C62  | C59  | C60  | -108.9(4) |
| C7  | C1  | C2  | C3  | 14.0(6)   | C66  | C62  | C63  | C64  | -178.6(3) |
| C7  | C1  | C4  | C5  | 177.4(5)  | C66  | C62  | C63  | C65  | 0.3(6)    |
| C7  | C1  | C4  | C6  | -2.2(6)   | C66  | C62  | C59  | C58  | -109.8(5) |
| C7  | C8  | C9  | C10 | 1.8(7)    | C66  | C62  | C59  | C60  | 70.5(5)   |
| C8  | C7  | C12 | C11 | 0.0(6)    | C66  | C67  | C68  | C69  | -5.5(7)   |
| C8  | C9  | C10 | C11 | -1.4(7)   | C66  | C67  | C68  | C73  | 175.3(4)  |
| C8  | C9  | C10 | C13 | 177.5(5)  | C67  | C68  | C69  | C70  | -179.6(4) |
| C9  | C10 | C11 | C12 | 0.3(7)    | C67  | C68  | C73  | C72  | -179.0(4) |
| C9  | C10 | C13 | F2  | 134.8(8)  | C68  | C69  | C70  | C71  | -1.9(6)   |
| C9  | C10 | C13 | F1  | 12.7(9)   | C68  | C69  | C70  | C74  | -179.9(3) |

**Table S18. Torsion Angles for HPQ4.**

| A   | B   | C    | D    | Angle/°    | A   | B   | C   | D   | Angle/°    |
|-----|-----|------|------|------------|-----|-----|-----|-----|------------|
| C9  | C10 | C13  | F3   | -165.5(13) | C69 | C68 | C73 | C72 | 1.8(6)     |
| C9  | C10 | C13  | F03{ | -104.0(7)  | C69 | C70 | C71 | O5  | -176.6(3)  |
| C9  | C10 | C13  | F04C | 73.9(15)   | C69 | C70 | C71 | C72 | 2.7(5)     |
| C9  | C10 | C13  | F14  | -43.8(16)  | C69 | C70 | C74 | N13 | -11.2(5)   |
| C10 | C11 | C12  | C7   | 0.4(6)     | C69 | C70 | C74 | N14 | 168.5(3)   |
| C10 | C13 | F3   | F03{ | 105.3(7)   | C70 | C71 | C72 | C73 | -1.3(6)    |
| C10 | C13 | F03{ | F3   | -98.7(11)  | C71 | C70 | C74 | N13 | 170.8(3)   |
| C11 | C10 | C13  | F2   | -46.3(10)  | C71 | C70 | C74 | N14 | -9.5(5)    |
| C11 | C10 | C13  | F1   | -168.4(7)  | C71 | C72 | C73 | C68 | -1.0(6)    |
| C11 | C10 | C13  | F3   | 13.4(14)   | C73 | C68 | C69 | C70 | -0.4(6)    |
| C11 | C10 | C13  | F03{ | 74.9(8)    | C74 | N13 | C75 | O7  | -178.0(3)  |
| C11 | C10 | C13  | F04C | -107.2(14) | C74 | N13 | C75 | C76 | 3.0(5)     |
| C11 | C10 | C13  | F14  | 135.1(15)  | C74 | N14 | C77 | C76 | 0.0(5)     |
| C12 | C7  | C8   | C9   | -1.1(6)    | C74 | N14 | C77 | C81 | 179.4(3)   |
| C13 | C10 | C11  | C12  | -178.6(4)  | C74 | C70 | C71 | O5  | 1.4(5)     |
| C14 | C15 | C16  | C17  | -0.5(5)    | C74 | C70 | C71 | C72 | -179.3(3)  |
| C15 | C14 | C19  | C18  | 1.9(5)     | C75 | N13 | C74 | N14 | -3.3(5)    |
| C15 | C16 | C17  | O3   | -176.5(3)  | C75 | N13 | C74 | C70 | 176.4(3)   |
| C15 | C16 | C17  | C18  | 4.5(5)     | C75 | C76 | C77 | N14 | 0.0(5)     |
| C16 | C17 | C18  | C19  | -5.1(5)    | C75 | C76 | C77 | C81 | -179.4(3)  |
| C16 | C17 | C18  | C20  | 172.7(3)   | C75 | C76 | C78 | C79 | 179.8(3)   |
| C17 | C18 | C19  | C14  | 1.9(5)     | C76 | C77 | C81 | C80 | -0.2(5)    |
| C17 | C18 | C20  | N5   | -169.0(3)  | C76 | C78 | C79 | C14 | 179.7(3)   |
| C17 | C18 | C20  | N6   | 7.7(5)     | C76 | C78 | C79 | C80 | -0.6(6)    |
| C19 | C14 | C15  | C16  | -2.6(5)    | C77 | N14 | C74 | N13 | 1.6(5)     |
| C19 | C18 | C20  | N5   | 8.8(5)     | C77 | N14 | C74 | C70 | -178.1(3)  |
| C19 | C18 | C20  | N6   | -174.5(3)  | C77 | C76 | C78 | C79 | 0.8(5)     |
| C20 | N5  | C21  | O2   | 177.5(4)   | C78 | C76 | C77 | N14 | 178.9(3)   |
| C20 | N5  | C21  | C22  | -2.5(5)    | C78 | C76 | C77 | C81 | -0.5(5)    |
| C20 | N6  | C23  | C22  | 0.6(5)     | C78 | C79 | C80 | C81 | -0.1(6)    |
| C20 | N6  | C23  | C24  | -179.8(4)  | C79 | C80 | C81 | C77 | 0.5(5)     |
| C20 | C18 | C19  | C14  | -175.9(3)  | F13 | C55 | C56 | C57 | -70.7(12)  |
| C21 | N5  | C20  | N6   | -0.4(6)    | F13 | C55 | C56 | C61 | 109.7(10)  |
| C21 | N5  | C20  | C18  | 176.2(3)   | F15 | C55 | C56 | C57 | 46.7(9)    |
| C21 | C22 | C23  | N6   | -3.5(5)    | F15 | C55 | C56 | C61 | -133.0(8)  |
| C21 | C22 | C23  | C24  | 177.0(4)   | F16 | C55 | C56 | C57 | 174.1(9)   |
| C21 | C22 | C27  | C26  | -177.6(4)  | F16 | C55 | C56 | C61 | -5.5(12)   |
| C22 | C23 | C24  | C25  | 1.1(6)     | C59 | C60 | C61 | C56 | 0.7(7)     |
| C23 | N6  | C20  | N5   | 1.4(5)     | C59 | C62 | C63 | C64 | 0.8(6)     |
| C23 | N6  | C20  | C18  | -175.2(3)  | C59 | C62 | C63 | C65 | 179.7(3)   |
| C23 | C22 | C27  | C26  | 0.8(6)     | C59 | C62 | C66 | C67 | 0.2(6)     |
| C23 | C24 | C25  | C26  | -0.1(7)    | F4  | C55 | C56 | C57 | -128.6(10) |
| C24 | C25 | C26  | C12  | 178.8(4)   | F4  | C55 | C56 | C61 | 51.7(11)   |
| C24 | C25 | C26  | C27  | -0.7(7)    | F5  | C55 | C56 | C57 | -6.7(16)   |
| C25 | C26 | C27  | C22  | 0.3(6)     | F5  | C55 | C56 | C61 | 173.6(13)  |

**Table S18. Torsion Angles for HPQ4.**

| A   | B   | C   | D   | Angle/°  | A  | B   | C   | D   | Angle/°   |
|-----|-----|-----|-----|----------|----|-----|-----|-----|-----------|
| C27 | C22 | C23 | N6  | 178.1(4) | F6 | C55 | C56 | C57 | 118.4(11) |
| C27 | C22 | C23 | C24 | -1.5(6)  | F6 | C55 | C56 | C61 | -61.2(13) |

**Table S19. Hydrogen Atom Coordinates ( $\text{\AA}\times 10^4$ ) and Isotropic Displacement Parameters ( $\text{\AA}^2\times 10^3$ ) for HPQ4.**

| Atom | x        | y        | z        | U(eq) |
|------|----------|----------|----------|-------|
| H4   | 6390.78  | -1230.6  | 10692.38 | 45    |
| H3B  | 6567.28  | -72.99   | 8468.16  | 31    |
| H29  | 6490.3   | -3507.43 | 10189.37 | 41    |
| H30  | 6366.21  | -2641.62 | 10576.26 | 39    |
| H33  | 6598.08  | -2109.99 | 8234.78  | 35    |
| H37  | 6245.16  | 662.37   | 8786.57  | 31    |
| H39  | 6059.16  | 1225.86  | 10352.49 | 37    |
| H40  | 6169.17  | 99.42    | 11102.32 | 34    |
| H42  | 5961.62  | 2110.47  | 9218.06  | 35    |
| H43  | 5845.19  | 1714.21  | 8183.88  | 38    |
| H49  | 4417.55  | 3725.19  | 7968.55  | 42    |
| H50  | 4481.49  | 4561.37  | 8377.41  | 51    |
| H52  | 7298.99  | 3908.86  | 8799.24  | 53    |
| H53  | 7239.28  | 3068.91  | 8400.14  | 46    |
| H3   | 7017.61  | 1657.52  | 4799.42  | 52    |
| H5   | 6636.51  | 256.8    | 6994.13  | 35    |
| H2   | 5371.55  | -1635.07 | 5638.51  | 41    |
| H3A  | 5258.6   | -1350.15 | 6779.37  | 36    |
| H8   | 3193.89  | -1751.77 | 7037.8   | 49    |
| H9   | 2365.75  | -1910.35 | 8147.16  | 54    |
| H11  | 4366.83  | -3402.94 | 8932.66  | 51    |
| H12  | 5161.7   | -3265.48 | 7820.22  | 47    |
| H15  | 5951     | -585     | 4919.05  | 36    |
| H16  | 6586.66  | 509.85   | 4234.18  | 37    |
| H19  | 5983.32  | -303.35  | 6628.32  | 34    |
| H24  | 7706.05  | 2886.12  | 5047.62  | 48    |
| H25  | 8355.27  | 3535.18  | 5504.83  | 48    |
| H27  | 7991.93  | 1933.66  | 7374.43  | 41    |
| H8A  | 11355.73 | 11118.08 | -490.9   | 43    |
| H12A | 10599.65 | 10409.85 | 1751.63  | 33    |
| H82  | 10526.47 | 8181.73  | 1995.86  | 35    |
| H84  | 11319.79 | 8406.83  | 13.1     | 35    |
| H85  | 11399.25 | 9591.26  | -374.59  | 32    |
| H92  | 11337.8  | 12782.44 | -872.32  | 33    |
| H93  | 10857.65 | 13262.23 | -86.72   | 33    |
| H95  | 10343.63 | 11380.02 | 1463.36  | 31    |
| H96  | 10208.32 | 13167.72 | 1084.38  | 32    |

**Table S19. Hydrogen Atom Coordinates ( $\text{\AA}\times 10^4$ ) and Isotropic Displacement Parameters ( $\text{\AA}^2\times 10^3$ ) for HPQ4.**

| Atom | x        | y        | z       | U(eq) |
|------|----------|----------|---------|-------|
| H97  | 9897.76  | 11872.06 | 2147.48 | 33    |
| H103 | 11095.12 | 13453.43 | 1989.51 | 41    |
| H104 | 11282.12 | 14613.91 | 1725.88 | 45    |
| H106 | 8172.62  | 14816.51 | 2009.91 | 41    |
| H107 | 7978.14  | 13653.17 | 2290.93 | 36    |
| H5A  | 10722.06 | 8795.99  | 5296.96 | 47    |
| H13  | 10400.3  | 9520.67  | 3157.82 | 32    |
| H57  | 8224.94  | 5350.37  | 3196    | 79    |
| H58  | 8691.17  | 6510.75  | 2676.28 | 68    |
| H60  | 6448.08  | 6854.07  | 4057.05 | 47    |
| H61  | 5965.93  | 5696.74  | 4569.92 | 57    |
| H66  | 8623.65  | 8295.72  | 3088.57 | 37    |
| H67  | 8455.71  | 7004.61  | 4166.4  | 40    |
| H69  | 9524.24  | 8681.96  | 3589.55 | 36    |
| H72  | 9782.21  | 7223.03  | 5841.32 | 40    |
| H73  | 9014.75  | 6835.9   | 5212.33 | 42    |
| H78  | 11649.58 | 11632.88 | 2712.29 | 36    |
| H80  | 12092.82 | 11389.16 | 4578.24 | 36    |
| H81  | 11469.3  | 10267.33 | 5069.56 | 32    |

**Table S20. Atomic Occupancy for HPQ4.**

| Atom | Occupancy | Atom | Occupancy | Atom | Occupancy |
|------|-----------|------|-----------|------|-----------|
| F2   | 0.823(7)  | F1   | 0.823(7)  | F3   | 0.177(7)  |
| F03{ | 0.823(7)  | F04C | 0.177(7)  | F14  | 0.177(7)  |
| F13  | 0.534(7)  | F15  | 0.534(7)  | F16  | 0.534(7)  |
| F4   | 0.466(7)  | F5   | 0.466(7)  | F6   | 0.466(7)  |

**Table S21. Solvent masks information for HPQ4.**

| Number | X     | Y     | Z     | Volume | Electron count | Content |
|--------|-------|-------|-------|--------|----------------|---------|
| 1      | 0.000 | 0.500 | 0.500 | 453.3  | 130.6          |         |
| 2      | 0.000 | 0.500 | 0.000 | 225.0  | 52.1           |         |
| 3      | 0.318 | 0.015 | 0.717 | 204.8  | 62.0           |         |
| 4      | 0.682 | 0.985 | 0.283 | 204.8  | 62.0           |         |

## SI References

1. S. Terzyan *et al.*, Human  $\gamma$ -glutamyl transpeptidase 1: structures of the free enzyme, inhibitor-bound tetrahedral transition states, and glutamate-bound enzyme reveal novel movement within the active site during catalysis. *J. Bio. Chem.* **290**,17576-17586 (2015).
2. E. Bobyr *et al.*, High-Resolution Analysis of  $Zn^{2+}$  Coordination in the Alkaline Phosphatase Superfamily by EXAFS and X-ray Crystallography. *J. Mol. Biol.* **415**, 102-117 (2012).
3. H. Liu, F. Liu, F. Wang, R. Q. Yu, J. H. Jiang, A novel mitochondrial-targeting near-infrared fluorescent probe for imaging  $\gamma$ -glutamyl transpeptidase activity in living cells. *Analyst* **143**, 5530-5535 (2018).
4. L. Zhou *et al.*, A high-resolution mitochondria-targeting ratiometric fluorescent probe for detection of the endogenous hypochlorous acid. *Spectrochimica Acta Part A* **166**, 129-134 (2016).
5. P. Gopalan *et al.*, Star-shaped azo-based dipolar chromophores: design, synthesis, matrix compatibility, and electro-optic activity. *J. Am. Chem. Soc.* **126**, 1741-1747 (2004).
6. J. Wang *et al.*, Two-photon near infrared fluorescent turn-on probe toward cysteine and its imaging applications. *ACS Sens.* **1**, 882-887 (2016).
7. K. Li *et al.*, *In situ* imaging of furin activity with a highly stable probe by releasing of precipitating fluorochrome. *Anal. chem.* **90**, 11680-11687 (2018).
8. M. Prost, L. Canaple, J. Samarut, J. Hasserodt, Tagging live cells that express specific peptidase activity with solid-state fluorescence. *Chembiochem* **15**, 1413-1417 (2014).
9. H. W. Liu *et al.*, *In situ* localization of enzyme activity in live cells by a molecular probe releasing a precipitating fluorochrome. *Angew. Chem. Int. Ed.* **56**, 11788-11792 (2017).
10. P. Zhang *et al.*, A two-photon fluorescent sensor revealing drug-induced liver injury via tracking gamma-glutamyltranspeptidase (GGT) level in vivo. *Biomaterials* **80**, 46-56 (2016).
11. L. Li, W. Shi, Z. Wang, Q. Gong, H. Ma, Sensitive fluorescence probe with long analytical wavelengths for gamma-glutamyl transpeptidase detection in human serum and living cells. *Anal. Chem.* **87**, 8353-8359 (2015).
12. P. Wang *et al.*, An efficient two-photon fluorescent probe for measuring gamma-glutamyltranspeptidase activity during the oxidative stress process in tumor cells and tissues. *Analyst* **142**, 1813-1820 (2017).
